# Supplementary material for: Colubrid Venom Composition: An -Omics Perspective
Source: Toxins (Basel). 2016 Jul 23;8(8):230. doi: 10.3390/toxins8080230 (PMC4999846; doi:10.3390/toxins8080230)
Supplement: Supplementary file 1 [file toxins-08-00230-s001.xlsx]

## Sheet: E miliaris
Seq. Name	Accession	Length	RPKM	Reads	Description
EMILCON_00016	GEFK01001864	556	293.12	15	agkistrodon contortrix clone e33difj02fk9jw microsatellite sequence
EMILCON_00022	GEFK01001865	551	1715.5	87	mus musculus large homolog-associated protein 1 transcript variant mrna
EMILCON_00024	GEFK01001866	591	165.45	9	laticauda semifasciata gene for long chain neurotoxin complete clone:4-1n
EMILCON_00026	GEFK01001867	708	598.49	39	orf2-encoded protein
EMILCON_00033	GEFK01001868	662	475.95	29	reverse transcriptase-like protein
EMILCON_00048	GEFK01001869	963	1421.57	126	---NA---
EMILCON_00057	GEFK01001870	568	363.44	19	agkistrodon contortrix clone e33difj02gg1mt microsatellite sequence
EMILCON_00061	GEFK01001871	511	318.93	15	bothrops jararaca toxin 2 partial cds
EMILCON_00068	GEFK01001872	502	259.72	12	agkahbgloydius halys gene for prepro-halystatin 2 and partial cds
EMILCON_00075	GEFK01001873	1029	411.79	39	---NA---
EMILCON_00079	GEFK01001874	960	984.62	87	orf2-encoded protein
EMILCON_00080	GEFK01001875	663	524.4	32	reverse transcriptase-like protein
EMILCON_00082	GEFK01001876	580	262.25	14	bothrops jararaca toxin 1 partial cds
EMILCON_00085	GEFK01001877	1357	488.4	61	agkistrodon contortrix clone e33difj02i19ov microsatellite sequence
EMILCON_00087	GEFK01001878	1889	885.75	154	vmmoc_najmo ame: full=zinc metalloproteinase mocarhagin-1 short=moc flags: precursor
EMILCON_00097	GEFK01001879	511	467.76	22	orf2-encoded protein
EMILCON_00105	GEFK01001880	978	788.76	71	agkistrodon contortrix clone e33difj02h7m2q microsatellite sequence
EMILCON_00113	GEFK01001881	927	550.86	47	---NA---
EMILCON_00116	GEFK01001882	651	1184.95	71	mus musculus naked cuticle 1 homolog transcript variant mrna
EMILCON_00123	GEFK01001883	1665	887.46	136	agkistrodon contortrix clone e33difj02gnsex microsatellite sequence
EMILCON_00124	GEFK01001884	790	23366.2	1699	vm3_agkpl ame: full=zinc metalloproteinase-disintegrin vmp-iii short= -iii flags: precursor
EMILCON_00134	GEFK01001885	630	827.8	48	endonuclease-reverse transcriptase
EMILCON_00136	GEFK01001886	1016	919.66	86	c-type lectin precursor
EMILCON_00153	GEFK01001887	1373	348.18	44	gloydius blomhoffi brevicaudus mrna for aminopeptidase complete cds
EMILCON_00154	GEFK01001888	809	550.63	41	reverse transcriptase-like protein
EMILCON_00155	GEFK01001889	518	419.49	20	orf2-encoded protein
EMILCON_00163	GEFK01001890	537	384.42	19	reverse transcriptase-like protein
EMILCON_00165	GEFK01001891	815	1359.77	102	philodryas olfersii cluster polf0083c c-type lectin complete cds
EMILCON_00166	GEFK01001892	1676	622.33	96	uhrf1-binding protein 1-like
EMILCON_00168	GEFK01001893	660	32.92	2	ophiophagus hannah l-amino acid oxidase complete cds
EMILCON_00183	GEFK01001894	528	308.66	15	---NA---
EMILCON_00227	GEFK01001895	767	1841.5	130	monosiga brevicollis mx1 protein monbrdraft_34038 complete cds
EMILCON_00233	GEFK01001896	808	1210.19	90	rtbs_drome ame: full=probable rna-directed dna polymerase from transposon bs ame: full=reverse transcriptase
EMILCON_00234	GEFK01001897	651	300.41	18	endonuclease reverse transcriptase
EMILCON_00235	GEFK01001898	654	448.55	27	endonuclease reverse transcriptase
EMILCON_00259	GEFK01001899	642	846.17	50	philodryas olfersii cluster polf0083c c-type lectin complete cds
EMILCON_00263	GEFK01001900	2037	768.06	144	lec3_sisca ame: full=c-type lectin isoform 3 flags: precursor
EMILCON_00267	GEFK01001901	1777	385.19	63	mus musculus activated spleen riken full-length enriched clone:f830027f12 product: full insert sequence
EMILCON_00268	GEFK01001902	673	1081.64	67	reverse
EMILCON_00270	GEFK01001903	1027	1481.09	140	agkistrodon contortrix clone e33difj02fv7z5 microsatellite sequence
EMILCON_00322	GEFK01001905	515	400.84	19	---NA---
EMILCON_00325	GEFK01001906	1307	1404.86	169	crotalus adamanteus serine proteinase 3 complete cds
EMILCON_00328	GEFK01001907	538	60.58	3	agkistrodon contortrix clone e33difj02jyuh0 microsatellite sequence
EMILCON_00336	GEFK01001908	548	495.66	25	mus musculus dna chr brigham & women s genetics 0562 expressed mrna
EMILCON_00355	GEFK01001909	979	5804.19	523	---NA---
EMILCON_00389	GEFK01001910	756	2558.12	178	reverse transcriptase-like protein
EMILCON_00393	GEFK01001911	1798	1758.43	291	rattus norvegicus tl0aea35yb24 mrna sequence
EMILCON_00394	GEFK01001912	505	150.6	7	mus musculus adult retina riken full-length enriched clone:a930006p13 product: full insert sequence
EMILCON_00442	GEFK01001913	546	8337.66	419	---NA---
EMILCON_00516	GEFK01001914	1759	2433.62	394	yo84_caeel ame: full= uncharacterized transposon-derived protein
EMILCON_00525	GEFK01001915	945	1828.05	159	reverse transcriptase-like protein
EMILCON_00599	GEFK01001916	522	145.7	7	pantherophis guttatus hoxc13 complete cds and hoxc12 partial cds
EMILCON_00619	GEFK01001917	502	1298.58	60	PREDICTED: hypothetical protein [Oryctolagus cuniculus]
EMILCON_00738	GEFK01001918	842	851.64	66	homo sapiens zinc finger protein 585b mrna
EMILCON_00743	GEFK01001919	607	1646.73	92	---NA---
EMILCON_00746	GEFK01001920	5158	2003.19	951	cfdp2_bovin ame: full=craniofacial development protein 2 ame: full=p97 bucentaur protein
EMILCON_00748	GEFK01001921	1491	3825.64	525	sus scrofa clone: expressed in lung
EMILCON_00749	GEFK01001922	1075	2890.55	286	homo sapiens cdna flj45576 clone brtha3011229
EMILCON_00754	GEFK01001923	859	4237.16	335	rattus norvegicus h lysosomal v1 subunit b1 mrna
EMILCON_00786	GEFK01001924	534	610.38	30	agkistrodon contortrix clone e33difj02hudy2 microsatellite sequence
EMILCON_00788	GEFK01001925	1145	759.11	80	elaphe quadrivirgata mrna for phospholipase a2 complete cds
EMILCON_00804	GEFK01001926	694	234.83	15	varanus griseus clone vgr-11 sauria complete sequence
EMILCON_00987	GEFK01001927	614	513.16	29	---NA---
EMILISO_00002	GEFK01000001	2437	855.99	192	crvp_trist ame: full=cysteine-rich secretory protein ame: full=stecrisp flags: precursor
EMILISO_00003	GEFK01000002	2431	831.29	186	crvp_trist ame: full=cysteine-rich secretory protein ame: full=stecrisp flags: precursor
EMILISO_00004	GEFK01000003	2424	726.11	162	crvp_trist ame: full=cysteine-rich secretory protein ame: full=stecrisp flags: precursor
EMILISO_00006	GEFK01000004	2418	795.32	177	crvp_trist ame: full=cysteine-rich secretory protein ame: full=stecrisp flags: precursor
EMILISO_00010	GEFK01000005	2480	420.57	96	agkistrodon contortrix clone e33difj02gmwkc microsatellite sequence
EMILISO_00011	GEFK01000006	1492	5366.87	737	crvp_liopo ame: full=cysteine-rich secretory protein lio1 short=crisp-lio1 flags: precursor
EMILISO_00012	GEFK01000007	1479	5061.44	689	crvp_liopo ame: full=cysteine-rich secretory protein lio1 short=crisp-lio1 flags: precursor
EMILISO_00015	GEFK01000008	1347	8235.33	1021	crvp_liopo ame: full=cysteine-rich secretory protein lio1 short=crisp-lio1 flags: precursor
EMILISO_00016	GEFK01000009	1334	9024.16	1108	crvp_liopo ame: full=cysteine-rich secretory protein lio1 short=crisp-lio1 flags: precursor
EMILISO_00019	GEFK01000010	723	11240.5	748	crvp_liopo ame: full=cysteine-rich secretory protein lio1 short=crisp-lio1 flags: precursor
EMILISO_00020	GEFK01000011	770	98.77	7	philodryas olfersii c-type natriuretic peptide complete cds
EMILISO_00021	GEFK01000012	768	155.62	11	philodryas olfersii c-type natriuretic peptide complete cds
EMILISO_00022	GEFK01000013	746	116.51	8	---NA---
EMILISO_00023	GEFK01000014	744	160.64	11	---NA---
EMILISO_00024	GEFK01000015	707	107.57	7	philodryas olfersii c-type natriuretic peptide complete cds
EMILISO_00025	GEFK01000016	705	0	0	philodryas olfersii c-type natriuretic peptide complete cds
EMILISO_00026	GEFK01000017	683	95.45	6	---NA---
EMILISO_00027	GEFK01000018	681	47.86	3	---NA---
EMILISO_00028	GEFK01000019	532	20.42	1	---NA---
EMILISO_00029	GEFK01000020	530	20.5	1	---NA---
EMILISO_00030	GEFK01000021	486	67.07	3	---NA---
EMILISO_00031	GEFK01000022	484	0	0	---NA---
EMILISO_00032	GEFK01000023	477	22.78	1	---NA---
EMILISO_00033	GEFK01000024	361	0	0	---NA---
EMILISO_00034	GEFK01000025	375	0	0	---NA---
EMILISO_00035	GEFK01000026	359	0	0	---NA---
EMILISO_00036	GEFK01000027	373	58.26	2	---NA---
EMILISO_00037	GEFK01000028	306	71.01	2	---NA---
EMILISO_00038	GEFK01000029	1454	9639.36	1290	clecb_phiol ame: full=c-type lectin subunit b flags: precursor
EMILISO_00039	GEFK01000030	1363	773.21	97	clecb_phiol ame: full=c-type lectin subunit b flags: precursor
EMILISO_00040	GEFK01000031	573	417.15	22	micrurus corallinus mcor0024c c-type lectin complete cds
EMILISO_00041	GEFK01000032	4173	5852.89	2248	vmipa_viple ame: full=zinc metalloproteinase-disintegrin vlaip-a flags: precursor
EMILISO_00042	GEFK01000033	529	410.77	20	mus musculus 2 days neonate thymus thymic cells riken full-length enriched clone:c920004d16 product: full insert sequence
EMILISO_00043	GEFK01000034	472	575.47	25	homo sapiens cdna flj41319 clone bramy2044349
EMILISO_00044	GEFK01000035	2712	60.09	15	endonuclease-reverse transcriptase
EMILISO_00045	GEFK01000036	2235	29.17	6	endonuclease-reverse transcriptase
EMILISO_00046	GEFK01000037	1904	97.01	17	yo84_caeel ame: full= uncharacterized transposon-derived protein
EMILISO_00047	GEFK01000038	2046	164.62	31	dna-dependent protein kinase catalytic subunit
EMILISO_00048	GEFK01000039	1790	127.46	21	yo84_caeel ame: full= uncharacterized transposon-derived protein
EMILISO_00049	GEFK01000040	1708	25.44	4	pinctada martensi clone liver04-70 microsatellite sequence
EMILISO_00050	GEFK01000041	1578	433.77	63	ywv1_caeel ame: full=uncharacterized protein
EMILISO_00051	GEFK01000042	1427	137.05	18	yo84_caeel ame: full= uncharacterized transposon-derived protein
EMILISO_00052	GEFK01000043	1569	124.64	18	dna-dependent protein kinase catalytic subunit
EMILISO_00053	GEFK01000044	1313	182.05	22	yo84_caeel ame: full= uncharacterized transposon-derived protein
EMILISO_00054	GEFK01000045	1231	61.78	7	philodryas olfersii cluster polf0081c cysteine-rich secretory protein complete cds
EMILISO_00055	GEFK01000046	770	42.33	3	yo84_caeel ame: full= uncharacterized transposon-derived protein
EMILISO_00056	GEFK01000047	656	99.37	6	yo84_caeel ame: full= uncharacterized transposon-derived protein
EMILISO_00057	GEFK01000048	2427	720.74	161	vmmoc_najmo ame: full=zinc metalloproteinase mocarhagin-1 short=moc flags: precursor
EMILISO_00058	GEFK01000049	2427	667.02	149	vmmoc_najmo ame: full=zinc metalloproteinase mocarhagin-1 short=moc flags: precursor
EMILISO_00059	GEFK01000050	2281	1043.14	219	vmmoc_najmo ame: full=zinc metalloproteinase mocarhagin-1 short=moc flags: precursor
EMILISO_00060	GEFK01000051	2281	704.95	148	vmmoc_najmo ame: full=zinc metalloproteinase mocarhagin-1 short=moc flags: precursor
EMILISO_00061	GEFK01000052	1997	582.14	107	vmmoc_najmo ame: full=zinc metalloproteinase mocarhagin-1 short=moc flags: precursor
EMILISO_00062	GEFK01000053	1997	369.96	68	vmmoc_najmo ame: full=zinc metalloproteinase mocarhagin-1 short=moc flags: precursor
EMILISO_00063	GEFK01000054	1851	716.1	122	vmmoc_najmo ame: full=zinc metalloproteinase mocarhagin-1 short=moc flags: precursor
EMILISO_00064	GEFK01000055	1851	622.19	106	vmmoc_najmo ame: full=zinc metalloproteinase mocarhagin-1 short=moc flags: precursor
EMILISO_00065	GEFK01000056	439	74.25	3	human chromosome 14 dna sequence bac r-325d8 of library rpci-11 from chromosome 14 of homo sapiens complete sequence
EMILISO_00066	GEFK01000057	2133	30.56	6	dna-dependent protein kinase catalytic subunit
EMILISO_00067	GEFK01000058	1985	175.15	32	dna-dependent protein kinase catalytic subunit
EMILISO_00068	GEFK01000059	1591	68.29	10	endonuclease-reverse transcriptase
EMILISO_00069	GEFK01000060	1443	15.06	2	dna-dependent protein kinase catalytic subunit
EMILISO_00070	GEFK01000061	1259	51.78	6	endonuclease-reverse transcriptase
EMILISO_00071	GEFK01000062	1111	19.56	2	dna-dependent protein kinase catalytic subunit
EMILISO_00072	GEFK01000063	931	58.35	5	bungarus flaviceps beta-bgt a2 mrna for beta-bungarotoxin a2 chain complete cds
EMILISO_00073	GEFK01000064	845	192.87	15	reverse transcriptase
EMILISO_00074	GEFK01000065	875	285.59	23	cordylus subviridis voucher nmbr8558 myosin heavy chain 2 partial sequence
EMILISO_00075	GEFK01000066	852	63.76	5	endonuclease-reverse transcriptase
EMILISO_00076	GEFK01000067	865	0	0	aspidoscelis hyperythra microsatellite ashy18 sequence
EMILISO_00077	GEFK01000068	771	28.18	2	danio rerio ubiquitin-conjugating enzyme e2b (rad6 homolog) mrna
EMILISO_00078	GEFK01000069	763	85.44	6	ophiophagus hannah ohanin complete cds
EMILISO_00079	GEFK01000070	724	15.01	1	cordylus subviridis voucher nmbr8558 myosin heavy chain 2 partial sequence
EMILISO_00080	GEFK01000071	714	45.65	3	aspidoscelis hyperythra microsatellite ashy18 sequence
EMILISO_00081	GEFK01000072	620	192.76	11	danio rerio ubiquitin-conjugating enzyme e2b (rad6 homolog) mrna
EMILISO_00082	GEFK01000073	612	0	0	ophiophagus hannah ohanin complete cds
EMILISO_00083	GEFK01000074	5634	3529.04	1830	lec1_phiol ame: full=lectoxin-phi1 flags: precursor
EMILISO_00084	GEFK01000075	5611	410.5	212	lec1_phiol ame: full=lectoxin-phi1 flags: precursor
EMILISO_00085	GEFK01000076	261	749.3	18	dictyostelium discoideum ax4 domain-containing protein complete cds
EMILISO_00086	GEFK01000077	766	0	0	---NA---
EMILISO_00087	GEFK01000078	590	55.24	3	---NA---
EMILISO_00088	GEFK01000079	544	0	0	---NA---
EMILISO_00089	GEFK01000080	489	88.87	4	---NA---
EMILISO_00090	GEFK01000081	368	88.57	3	---NA---
EMILISO_00091	GEFK01000082	313	173.56	5	---NA---
EMILISO_00092	GEFK01000083	1217	35.71	4	---NA---
EMILISO_00093	GEFK01000084	1101	29.6	3	reverse transcriptase family protein
EMILISO_00094	GEFK01000085	672	129.34	8	---NA---
EMILISO_00095	GEFK01000086	586	37.08	2	---NA---
EMILISO_00096	GEFK01000087	1434	447.02	59	vmipb_viple ame: full=zinc metalloproteinase-disintegrin vlaip-b flags: precursor
EMILISO_00097	GEFK01000088	1434	272.76	36	vmipb_viple ame: full=zinc metalloproteinase-disintegrin vlaip-b flags: precursor
EMILISO_00098	GEFK01000089	1522	35.69	5	ddx5_ponab ame: full=probable atp-dependent rna helicase ddx5 ame: full=dead box protein 5
EMILISO_00099	GEFK01000090	1406	193.19	25	ddx5_macfa ame: full=probable atp-dependent rna helicase ddx5 ame: full=dead box protein 5
EMILISO_00100	GEFK01000091	1398	15.54	2	ddx5_ponab ame: full=probable atp-dependent rna helicase ddx5 ame: full=dead box protein 5
EMILISO_00101	GEFK01000092	1022	116.94	11	ddx5_ponab ame: full=probable atp-dependent rna helicase ddx5 ame: full=dead box protein 5
EMILISO_00102	GEFK01000093	898	96.79	8	ddx5_mouse ame: full=probable atp-dependent rna helicase ddx5 ame: full=dead box rna helicase dead1 short=mdead1 ame: full=dead box protein 5 ame: full=rna helicase p68
EMILISO_00103	GEFK01000094	1105	717.77	73	tprg1_human ame: full=tumor protein p63-regulated gene 1 protein ame: full=protein fam79b
EMILISO_00104	GEFK01000095	945	22.99	2	tprg1_human ame: full=tumor protein p63-regulated gene 1 protein ame: full=protein fam79b
EMILISO_00105	GEFK01000096	311	2375.59	68	populus est from severe drought-stressed leaves
EMILISO_00107	GEFK01000097	3102	77.06	22	ppr1b_human ame: full=protein phosphatase 1 regulatory subunit 1b ame: full=darpp-32 ame: full=dopamine- and camp-regulated neuronal phosphoprotein
EMILISO_00108	GEFK01000098	3030	268.93	75	ppr1b_bovin ame: full=protein phosphatase 1 regulatory subunit 1b ame: full=darpp-32 ame: full=dopamine- and camp-regulated neuronal phosphoprotein
EMILISO_00109	GEFK01000099	2643	61.66	15	reverse transcriptase-like
EMILISO_00110	GEFK01000100	426	127.52	5	ppr1b_bovin ame: full=protein phosphatase 1 regulatory subunit 1b ame: full=darpp-32 ame: full=dopamine- and camp-regulated neuronal phosphoprotein
EMILISO_00111	GEFK01000101	1010	21.51	2	cfah_human ame: full=complement factor h ame: full=h factor 1 flags: precursor
EMILISO_00112	GEFK01000102	821	66.17	5	cfah_mouse ame: full=complement factor h ame: full=protein beta-1-h flags: precursor
EMILISO_00113	GEFK01000103	749	0	0	f13b_mouse ame: full=coagulation factor xiii b chain ame: full=protein-glutamine gamma-glutamyltransferase b chain ame: full=transglutaminase b chain flags: precursor
EMILISO_00114	GEFK01000104	560	58.2	3	fhr1_human ame: full=complement factor h-related protein 1 short=fhr-1 ame: full=h factor-like protein 1 short=h-factor-like 1 ame: full=h36 flags: precursor
EMILISO_00115	GEFK01000105	2445	559.91	126	vm3_agkpl ame: full=zinc metalloproteinase-disintegrin vmp-iii short= -iii flags: precursor
EMILISO_00116	GEFK01000106	2445	573.24	129	vm3_agkpl ame: full=zinc metalloproteinase-disintegrin vmp-iii short= -iii flags: precursor
EMILISO_00117	GEFK01000107	548	39.65	2	---NA---
EMILISO_00118	GEFK01000108	1183	45.92	5	uba1_mouse ame: full=ubiquitin-like modifier-activating enzyme 1 ame: full=ubiquitin-activating enzyme e1 ame: full=ubiquitin-activating enzyme e1 x ame: full=ubiquitin-like modifier-activating enzyme 1 x
EMILISO_00119	GEFK01000109	1117	175.08	18	uba1_mouse ame: full=ubiquitin-like modifier-activating enzyme 1 ame: full=ubiquitin-activating enzyme e1 ame: full=ubiquitin-activating enzyme e1 x ame: full=ubiquitin-like modifier-activating enzyme 1 x
EMILISO_00120	GEFK01000110	697	46.76	3	uba1_bovin ame: full=ubiquitin-like modifier-activating enzyme 1 ame: full=ubiquitin-activating enzyme e1
EMILISO_00121	GEFK01000111	2527	1298.45	302	pdia1_mouse ame: full=protein disulfide-isomerase short=pdi ame: full=cellular thyroid hormone-binding protein ame: full=endoplasmic reticulum resident protein 59 short=er protein 59 short=erp59 ame: full=prolyl 4-hydroxylase subunit beta ame: full=p55 flags: precursor
EMILISO_00122	GEFK01000112	2527	1083.47	252	pdia1_mouse ame: full=protein disulfide-isomerase short=pdi ame: full=cellular thyroid hormone-binding protein ame: full=endoplasmic reticulum resident protein 59 short=er protein 59 short=erp59 ame: full=prolyl 4-hydroxylase subunit beta ame: full=p55 flags: precursor
EMILISO_00123	GEFK01000113	2380	1410.6	309	pdia1_mouse ame: full=protein disulfide-isomerase short=pdi ame: full=cellular thyroid hormone-binding protein ame: full=endoplasmic reticulum resident protein 59 short=er protein 59 short=erp59 ame: full=prolyl 4-hydroxylase subunit beta ame: full=p55 flags: precursor
EMILISO_00124	GEFK01000114	2380	1154.96	253	pdia1_mouse ame: full=protein disulfide-isomerase short=pdi ame: full=cellular thyroid hormone-binding protein ame: full=endoplasmic reticulum resident protein 59 short=er protein 59 short=erp59 ame: full=prolyl 4-hydroxylase subunit beta ame: full=p55 flags: precursor
EMILISO_00125	GEFK01000115	2209	255.76	52	hyal2_rat ame: full=hyaluronidase-2 short=hyal-2 ame: full=hyaluronoglucosaminidase-2 flags: precursor
EMILISO_00126	GEFK01000116	2180	274.11	55	hyal2_rat ame: full=hyaluronidase-2 short=hyal-2 ame: full=hyaluronoglucosaminidase-2 flags: precursor
EMILISO_00127	GEFK01000117	2129	193.92	38	hyal2_rat ame: full=hyaluronidase-2 short=hyal-2 ame: full=hyaluronoglucosaminidase-2 flags: precursor
EMILISO_00128	GEFK01000118	2100	305.25	59	hyal2_rat ame: full=hyaluronidase-2 short=hyal-2 ame: full=hyaluronoglucosaminidase-2 flags: precursor
EMILISO_00129	GEFK01000119	1030	73.84	7	pcbp2_mouse ame: full=poly -binding protein 2 ame: full=alpha-cp2 ame: full=ctbp short=cbp ame: full= heterogeneous nuclear ribonucleoprotein x short=hnrnp x
EMILISO_00130	GEFK01000120	991	296.01	27	pcbp2_mouse ame: full=poly -binding protein 2 ame: full=alpha-cp2 ame: full=ctbp short=cbp ame: full= heterogeneous nuclear ribonucleoprotein x short=hnrnp x
EMILISO_00131	GEFK01000121	988	43.99	4	pcbp2_mouse ame: full=poly -binding protein 2 ame: full=alpha-cp2 ame: full=ctbp short=cbp ame: full= heterogeneous nuclear ribonucleoprotein x short=hnrnp x
EMILISO_00132	GEFK01000122	949	57.24	5	pcbp2_mouse ame: full=poly -binding protein 2 ame: full=alpha-cp2 ame: full=ctbp short=cbp ame: full= heterogeneous nuclear ribonucleoprotein x short=hnrnp x
EMILISO_00133	GEFK01000123	880	185.2	15	bungarus multicinctus clone b250_20e_1 three-finger toxin partial cds
EMILISO_00134	GEFK01000124	836	38.99	3	---NA---
EMILISO_00135	GEFK01000125	713	60.95	4	bungarus multicinctus clone b250_20e_1 three-finger toxin partial cds
EMILISO_00136	GEFK01000126	669	48.72	3	bungarus multicinctus clone b250_20e_1 three-finger toxin partial cds
EMILISO_00137	GEFK01000127	869	187.54	15	xenopus tropicalis clone ch216- complete sequence
EMILISO_00138	GEFK01000128	773	28.11	2	xenopus tropicalis clone ch216- complete sequence
EMILISO_00139	GEFK01000129	490	66.52	3	xenopus tropicalis clone ch216- complete sequence
EMILISO_00140	GEFK01000130	394	137.88	5	xenopus tropicalis clone ch216- complete sequence
EMILISO_00141	GEFK01000131	733	29.64	2	ahnk_human ame: full=neuroblast differentiation-associated protein ahnak ame: full=desmoyokin
EMILISO_00142	GEFK01000132	645	84.22	5	ahnk_human ame: full=neuroblast differentiation-associated protein ahnak ame: full=desmoyokin
EMILISO_00143	GEFK01000133	601	54.23	3	ahnk_human ame: full=neuroblast differentiation-associated protein ahnak ame: full=desmoyokin
EMILISO_00144	GEFK01000134	513	84.72	4	ahnk_human ame: full=neuroblast differentiation-associated protein ahnak ame: full=desmoyokin
EMILISO_00145	GEFK01000135	793	54.8	4	dna-dependent protein kinase catalytic subunit
EMILISO_00146	GEFK01000136	619	70.21	4	dna-dependent protein kinase catalytic subunit
EMILISO_00147	GEFK01000137	594	219.49	12	agkistrodon contortrix clone e33difj02hudy2 microsatellite sequence
EMILISO_00148	GEFK01000138	420	672.58	26	endonuclease-reverse transcriptase
EMILISO_00149	GEFK01000139	750	43.46	3	lat3_human ame: full=large neutral amino acids transporter small subunit 3 ame: full=l-type amino acid transporter 3 ame: full=prostate cancer overexpressed gene 1 protein ame: full=solute carrier family 43 member 1
EMILISO_00150	GEFK01000140	733	74.11	5	lat3_human ame: full=large neutral amino acids transporter small subunit 3 ame: full=l-type amino acid transporter 3 ame: full=prostate cancer overexpressed gene 1 protein ame: full=solute carrier family 43 member 1
EMILISO_00151	GEFK01000141	476	45.65	2	anolis carolinensis solute carrier family member 1 mrna
EMILISO_00152	GEFK01000142	459	0	0	lat3_human ame: full=large neutral amino acids transporter small subunit 3 ame: full=l-type amino acid transporter 3 ame: full=prostate cancer overexpressed gene 1 protein ame: full=solute carrier family 43 member 1
EMILISO_00153	GEFK01000143	1173	333.45	36	reverse transcriptase
EMILISO_00154	GEFK01000144	818	132.82	10	mus musculus tbc1 domain member 24 transcript variant mrna
EMILISO_00155	GEFK01000145	719	75.56	5	mus musculus tbc1 domain member 24 transcript variant mrna
EMILISO_00156	GEFK01000146	1126	192.98	20	bothrops jararaca toxin 1 partial cds
EMILISO_00157	GEFK01000147	882	135.5	11	anolis carolinensis arylsulfatase d-like mrna
EMILISO_00158	GEFK01000148	603	18.02	1	mus musculus 16 days embryo head riken full-length enriched clone:c130064g18 product: full insert sequence
EMILISO_00159	GEFK01000149	1483	139.2	19	agkistrodon contortrix clone e33difj02h7sne microsatellite sequence
EMILISO_00160	GEFK01000150	503	43.2	2	---NA---
EMILISO_00161	GEFK01000151	405	26.83	1	---NA---
EMILISO_00162	GEFK01000152	893	535.33	44	rna-directed dna polymerase from mobile element jockey-like
EMILISO_00163	GEFK01000153	801	325.54	24	rna-directed dna polymerase from mobile element jockey-like
EMILISO_00164	GEFK01000154	585	55.72	3	drymarchon couperi microsatellite dry06 sequence
EMILISO_00165	GEFK01000155	861	63.09	5	sjchgc04878 protein
EMILISO_00166	GEFK01000156	864	138.33	11	salmo salar clone ssal-rgf-515-255 angio-associated migratory cell protein complete cds
EMILISO_00167	GEFK01000157	193	112.59	2	sjchgc04878 protein
EMILISO_00168	GEFK01000158	1456	1111.85	149	leg3_canfa ame: full=galectin-3 short=gal-3 ame: full=35 kda lectin ame: full=carbohydrate-binding protein 35 short=cbp 35 ame: full=galactose-specific lectin 3 ame: full= -binding protein ame: full=laminin-binding protein ame: full=lectin l-29 ame: full=mac-2 antigen
EMILISO_00169	GEFK01000159	473	0	0	naja sputatrix neutral phospholipase a2 complete cds
EMILISO_00170	GEFK01000160	464	70.25	3	---NA---
EMILISO_00171	GEFK01000161	571	171.25	9	bpil2_mouse ame: full=bactericidal permeability-increasing 2 flags: precursor
EMILISO_00172	GEFK01000162	459	355.06	15	schistosoma japonicum sjchgc06985 protein complete cds
EMILISO_00173	GEFK01000163	380	228.73	8	schistosoma japonicum sjchgc06985 protein complete cds
EMILISO_00174	GEFK01000164	470	161.82	7	zn572_bovin ame: full=zinc finger protein 572
EMILISO_00175	GEFK01000165	147	886.92	12	zn572_human ame: full=zinc finger protein 572
EMILISO_00176	GEFK01000166	107	304.62	3	znf2_mouse ame: full=zinc finger protein 2 ame: full=zinc finger protein 661 short=zfp-661
EMILISO_00177	GEFK01000167	2612	445.08	107	muc24_mouse ame: full=sialomucin core protein 24 short=muc-24 ame: full=endolyn ame: full=multi-glycosylated core protein 24 short=mgc-24 short=mgc-24v ame: cd_antigen=cd164 flags: precursor
EMILISO_00178	GEFK01000168	2612	266.21	64	muc24_mouse ame: full=sialomucin core protein 24 short=muc-24 ame: full=endolyn ame: full=multi-glycosylated core protein 24 short=mgc-24 short=mgc-24v ame: cd_antigen=cd164 flags: precursor
EMILISO_00179	GEFK01000169	1726	358.8	57	elaphe quadrivirgata mrna for phospholipase a2 complete cds
EMILISO_00180	GEFK01000170	1706	165.58	26	elaphe quadrivirgata mrna for phospholipase a2 complete cds
EMILISO_00181	GEFK01000171	3336	726.28	223	dmbt1_rat ame: full=deleted in malignant brain tumors 1 protein ame: full=ebnerin ame: full=hensin ame: full=pancrin flags: precursor
EMILISO_00182	GEFK01000172	1533	92.13	13	cld15_bovin ame: full=claudin-15
EMILISO_00183	GEFK01000173	1527	220.57	31	cld15_bovin ame: full=claudin-15
EMILISO_00186	GEFK01000176	651	83.45	5	tm87b_mouse ame: full=transmembrane protein 87b flags: precursor
EMILISO_00187	GEFK01000177	648	83.83	5	tm87b_mouse ame: full=transmembrane protein 87b flags: precursor
EMILISO_00188	GEFK01000178	562	579.97	30	nu5m_dinse ame: full=nadh-ubiquinone oxidoreductase chain 5 ame: full=nadh dehydrogenase subunit 5
EMILISO_00189	GEFK01000179	547	99.31	5	nu5m_dinse ame: full=nadh-ubiquinone oxidoreductase chain 5 ame: full=nadh dehydrogenase subunit 5
EMILISO_00190	GEFK01000180	781	1711.11	123	---NA---
EMILISO_00191	GEFK01000181	5536	51.03	26	mgt4a_chick ame: full=alpha- -mannosyl-glycoprotein 4-beta-n-acetylglucosaminyltransferase a ame: full=n-glycosyl-oligosaccharide-glycoprotein n-acetylglucosaminyltransferase iva short= c-t iva short= -iva short=n-acetylglucosaminyltransferase iva ame
EMILISO_00192	GEFK01000182	5504	357.29	181	mgt4a_chick ame: full=alpha- -mannosyl-glycoprotein 4-beta-n-acetylglucosaminyltransferase a ame: full=n-glycosyl-oligosaccharide-glycoprotein n-acetylglucosaminyltransferase iva short= c-t iva short= -iva short=n-acetylglucosaminyltransferase iva ame
EMILISO_00193	GEFK01000183	5532	817.02	416	vegfa_trifl ame: full=vascular endothelial growth factor a short=vegf-a ame: full=vascular permeability factor short=vpf flags: precursor
EMILISO_00194	GEFK01000184	2903	101.05	27	vegfa_trifl ame: full=vascular endothelial growth factor a short=vegf-a ame: full=vascular permeability factor short=vpf flags: precursor
EMILISO_00195	GEFK01000185	3047	228.21	64	er degradation-enhancing alpha-mannosidase-like 3-like
EMILISO_00196	GEFK01000186	3017	126.04	35	er degradation-enhancing alpha-mannosidase-like 3-like
EMILISO_00197	GEFK01000187	2332	293.52	63	---NA---
EMILISO_00198	GEFK01000188	1841	17.7	3	epinephelus coioides ldl receptor-related protein associated protein 1 complete cds
EMILISO_00199	GEFK01000189	2052	285.92	54	gfpt1_mouse ame: full=glucosamine--fructose-6-phosphate aminotransferase 1 ame: full=d-fructose-6-phosphate amidotransferase 1 ame: full=glutamine:fructose 6 phosphate amidotransferase 1 short=gfat 1 short=gfat1 ame: full=hexosephosphate aminotransferase 1
EMILISO_00200	GEFK01000190	1998	87.01	16	gfpt1_rat ame: full=glucosamine--fructose-6-phosphate aminotransferase 1 ame: full=d-fructose-6-phosphate amidotransferase 1 ame: full=glutamine:fructose 6 phosphate amidotransferase 1 short=gfat 1 short=gfat1 ame: full=hexosephosphate aminotransferase 1
EMILISO_00201	GEFK01000191	1900	388.85	68	vmha_agkhp ame: full=zinc metalloprotease-disintegrin halysase flags: precursor
EMILISO_00202	GEFK01000192	1900	211.58	37	vmha_agkhp ame: full=zinc metalloprotease-disintegrin halysase flags: precursor
EMILISO_00203	GEFK01000193	1858	409.33	70	nec1_human ame: full=neuroendocrine convertase 1 short=nec 1 ame: full=prohormone convertase 1 ame: full=proprotein convertase 1 short=pc1 flags: precursor
EMILISO_00204	GEFK01000194	1795	127.11	21	nec1_human ame: full=neuroendocrine convertase 1 short=nec 1 ame: full=prohormone convertase 1 ame: full=proprotein convertase 1 short=pc1 flags: precursor
EMILISO_00205	GEFK01000195	2042	558.67	105	vmipb_viple ame: full=zinc metalloproteinase-disintegrin vlaip-b flags: precursor
EMILISO_00206	GEFK01000196	1156	498.13	53	vmv1_croat ame: full=zinc metalloproteinase-disintegrin vap1 ame: full=vascular apoptosis-inducing protein 1 short=vap-1 flags: precursor
EMILISO_00207	GEFK01000197	2281	457.27	96	agkistrodon contortrix clone e33difj02jotsj microsatellite sequence
EMILISO_00208	GEFK01000198	881	123.32	10	anx11_mouse ame: full=annexin a11 ame: full=annexin xi ame: full=annexin-11 ame: full=calcyclin-associated annexin 50 short=cap-50
EMILISO_00209	GEFK01000199	1655	78.78	12	metrl_human ame: full=meteorin-like protein flags: precursor
EMILISO_00210	GEFK01000200	1502	499.12	69	metrl_xenla ame: full=meteorin-like protein flags: precursor
EMILISO_00211	GEFK01000201	1546	210.83	30	pairb_mouse ame: full=plasminogen activator inhibitor 1 rna-binding protein ame: full=pai1 rna-binding protein 1 short=pai-rbp1 ame: full=serpine1 mrna-binding protein 1
EMILISO_00212	GEFK01000202	1522	171.32	24	pairb_mouse ame: full=plasminogen activator inhibitor 1 rna-binding protein ame: full=pai1 rna-binding protein 1 short=pai-rbp1 ame: full=serpine1 mrna-binding protein 1
EMILISO_00213	GEFK01000203	1377	47.34	6	pdia4_rat ame: full=protein disulfide-isomerase a4 ame: full=calcium-binding protein 2 short= 2 ame: full=endoplasmic reticulum resident protein 70 short=er protein 70 short=erp70
EMILISO_00214	GEFK01000204	1295	109.07	13	pdia4_rat ame: full=protein disulfide-isomerase a4 ame: full=calcium-binding protein 2 short= 2 ame: full=endoplasmic reticulum resident protein 70 short=er protein 70 short=erp70
EMILISO_00215	GEFK01000205	1271	111.13	13	copia_drome ame: full=copia protein ame: full=gag-int-pol protein contains: ame: full=copia vlp protein contains: ame: full=copia protease
EMILISO_00216	GEFK01000206	1239	35.08	4	copia_drome ame: full=copia protein ame: full=gag-int-pol protein contains: ame: full=copia vlp protein contains: ame: full=copia protease
EMILISO_00217	GEFK01000207	1733	376.16	60	gfra4_chick ame: full=gdnf family receptor alpha-4 short=gdnf receptor alpha-4 short=gdnfr-alpha-4 short=gfr-alpha-4 flags: precursor
EMILISO_00218	GEFK01000208	718	45.4	3	gfra4_chick ame: full=gdnf family receptor alpha-4 short=gdnf receptor alpha-4 short=gdnfr-alpha-4 short=gfr-alpha-4 flags: precursor
EMILISO_00219	GEFK01000209	1735	651.26	104	k2co_chick ame: full= type ii cytoskeletal cochleal ame: full=cytokeratin otokeratin
EMILISO_00220	GEFK01000210	679	64	4	k2co_chick ame: full= type ii cytoskeletal cochleal ame: full=cytokeratin otokeratin
EMILISO_00221	GEFK01000211	1066	9152.55	898	---NA---
EMILISO_00222	GEFK01000212	1051	7877.26	762	---NA---
EMILISO_00223	GEFK01000213	1019	95.96	9	tpmt_bovin ame: full=thiopurine s-methyltransferase ame: full=thiopurine methyltransferase
EMILISO_00224	GEFK01000214	1004	227.25	21	tpmt_bovin ame: full=thiopurine s-methyltransferase ame: full=thiopurine methyltransferase
EMILISO_00225	GEFK01000215	1428	243.47	32	orf2-encoded protein
EMILISO_00226	GEFK01000216	452	48.07	2	orf2-encoded protein
EMILISO_00227	GEFK01000217	1194	227.49	25	at2a3_chick ame: full=sarcoplasmic endoplasmic reticulum calcium atpase 3 short= 3 short=serca3 short=sr ca(2+)-atpase 3 ame: full=calcium pump 3
EMILISO_00228	GEFK01000218	666	48.94	3	at2a3_chick ame: full=sarcoplasmic endoplasmic reticulum calcium atpase 3 short= 3 short=serca3 short=sr ca(2+)-atpase 3 ame: full=calcium pump 3
EMILISO_00229	GEFK01000219	1025	222.6	21	rtjk_drome ame: full=rna-directed dna polymerase from mobile element jockey ame: full=reverse transcriptase
EMILISO_00230	GEFK01000220	817	79.79	6	rtjk_drome ame: full=rna-directed dna polymerase from mobile element jockey ame: full=reverse transcriptase
EMILISO_00231	GEFK01000221	939	393.4	34	mus musculus tripartite motif-containing 12c transcript variant mrna
EMILISO_00232	GEFK01000222	911	59.63	5	thamnophis elegans isolate voltage-gated sodium channel exon 20 and partial cds
EMILISO_00233	GEFK01000223	1299	326.2	39	leg8_mouse ame: full=galectin-8 short=gal-8 ame: full=lgals-8
EMILISO_00234	GEFK01000224	497	87.44	4	---NA---
EMILISO_00235	GEFK01000225	930	186.92	16	mus musculus nod-derived cd11c +ve dendritic cells riken full-length enriched clone:f630223f16 product: full insert sequence
EMILISO_00236	GEFK01000226	855	127.07	10	agkistrodon contortrix clone e33difj02hqhx0 microsatellite sequence
EMILISO_00237	GEFK01000227	853	89.16	7	salmo salar clone ssal-rgf-537-017 transposable element tcb2 transposase pseudogene cds
EMILISO_00238	GEFK01000228	808	107.57	8	salmo salar clone ssal-rgf-537-017 transposable element tcb2 transposase pseudogene cds
EMILISO_00239	GEFK01000229	990	702.37	64	drosophila pseudoobscura pseudoobscura ga27216 (dpse\ga27216) mrna
EMILISO_00240	GEFK01000230	651	500.68	30	---NA---
EMILISO_00241	GEFK01000231	1083	140.45	14	lin1_nycco ame: full=line-1 reverse transcriptase homolog
EMILISO_00242	GEFK01000232	529	41.08	2	lin1_nycco ame: full=line-1 reverse transcriptase homolog
EMILISO_00243	GEFK01000233	940	300.52	26	anolis carolinensis zinc finger protein 420-like mrna
EMILISO_00244	GEFK01000234	674	112.84	7	anolis carolinensis zinc finger protein 420-like mrna
EMILISO_00245	GEFK01000235	802	149.02	11	acidic leucine-rich nuclear phosphoprotein 32 family member b
EMILISO_00246	GEFK01000236	783	55.5	4	transposable element tcb1 transposase
EMILISO_00247	GEFK01000237	921	200.55	17	xenopus tropicalis finished clone tegg114n09
EMILISO_00248	GEFK01000238	635	342.2	20	agkistrodon contortrix clone e33difj02hudy2 microsatellite sequence
EMILISO_00249	GEFK01000239	835	143.13	11	qcr2_rat ame: full=cytochrome b-c1 complex subunit mitochondrial ame: full=complex iii subunit 2 ame: full=core protein ii ame: full=ubiquinol-cytochrome-c reductase complex core protein 2 flags: precursor
EMILISO_00250	GEFK01000240	732	44.53	3	qcr2_bovin ame: full=cytochrome b-c1 complex subunit mitochondrial ame: full=complex iii subunit 2 ame: full=core protein ii ame: full=ubiquinol-cytochrome-c reductase complex core protein 2 flags: precursor
EMILISO_00251	GEFK01000241	822	237.92	18	halocynthia roretzi genes for adult body-wall muscle troponin adult cardiac troponin complete cds
EMILISO_00252	GEFK01000242	700	77.61	5	carollia perspicillata clone complete sequence
EMILISO_00253	GEFK01000243	785	692.03	50	---NA---
EMILISO_00254	GEFK01000244	743	204.72	14	---NA---
EMILISO_00255	GEFK01000245	763	156.64	11	---NA---
EMILISO_00256	GEFK01000246	753	72.14	5	---NA---
EMILISO_00257	GEFK01000247	815	79.99	6	---NA---
EMILISO_00258	GEFK01000248	706	492.46	32	---NA---
EMILISO_00259	GEFK01000249	762	128.32	9	gryllus bimaculatus gbcontig24010
EMILISO_00260	GEFK01000250	752	375.65	26	dictyostelium discoideum ax4 g-protein-coupled receptor family 3 protein 17 complete cds
EMILISO_00261	GEFK01000251	1007	356.05	33	mgt4a_chick ame: full=alpha- -mannosyl-glycoprotein 4-beta-n-acetylglucosaminyltransferase a ame: full=n-glycosyl-oligosaccharide-glycoprotein n-acetylglucosaminyltransferase
EMILISO_00262	GEFK01000252	496	43.81	2	---NA---
EMILISO_00263	GEFK01000253	744	102.22	7	hmr1_rat ame: full=major histocompatibility complex class i-related gene protein ame: full=mhc class i-related gene protein flags: precursor
EMILISO_00264	GEFK01000254	730	282.78	19	hmr1_rat ame: full=major histocompatibility complex class i-related gene protein ame: full=mhc class i-related gene protein flags: precursor
EMILISO_00265	GEFK01000255	900	193.15	16	gale_rat ame: full=udp-glucose 4-epimerase ame: full=galactowaldenase ame: full=udp-galactose 4-epimerase
EMILISO_00266	GEFK01000256	525	41.39	2	gale_ponab ame: full=udp-glucose 4-epimerase ame: full=galactowaldenase ame: full=udp-galactose 4-epimerase
EMILISO_00267	GEFK01000257	814	373.73	28	yo84_caeel ame: full= uncharacterized transposon-derived protein
EMILISO_00268	GEFK01000258	580	243.52	13	yo84_caeel ame: full= uncharacterized transposon-derived protein
EMILISO_00269	GEFK01000259	697	639.11	41	lec3_liopo ame: full=lectoxin-lio3 flags: precursor
EMILISO_00270	GEFK01000260	700	760.54	49	lec3_liopo ame: full=lectoxin-lio3 flags: precursor
EMILISO_00271	GEFK01000261	749	43.52	3	anolis carolinensis actin-related protein 2 3 complex subunit 2-like mrna
EMILISO_00272	GEFK01000262	605	125.71	7	arpc2_bovin ame: full=actin-related protein 2 3 complex subunit 2 ame: full=arp2 3 complex 34 kda subunit short=p34-arc
EMILISO_00273	GEFK01000263	951	422.71	37	tlcd1_mouse ame: full=tlc domain-containing protein 1 flags: precursor
EMILISO_00274	GEFK01000264	354	0	0	gallus gallus calfacilitin complete cds
EMILISO_00277	GEFK01000265	669	64.96	4	---NA---
EMILISO_00278	GEFK01000266	599	163.24	9	danio rerio calcyon neuron-specific vesicular protein mrna
EMILISO_00279	GEFK01000267	754	57.64	4	big3_mouse ame: full=brefeldin a-inhibited guanine nucleotide-exchange protein 3
EMILISO_00280	GEFK01000268	519	125.6	6	imantodes cenchoa voucher mvz 149878 complete genome
EMILISO_00281	GEFK01000269	729	238.46	16	roa2_sagoe ame: full=heterogeneous nuclear ribonucleoproteins a2 b1 short=hnrnp a2 b1 ame: full=vitamin d response element-binding protein 2 short=vdre-bp 2
EMILISO_00282	GEFK01000270	539	120.94	6	roa2_sagoe ame: full=heterogeneous nuclear ribonucleoproteins a2 b1 short=hnrnp a2 b1 ame: full=vitamin d response element-binding protein 2 short=vdre-bp 2
EMILISO_00283	GEFK01000271	903	156.41	13	phospholipase a2 inhibitor 31 kda subunit-like
EMILISO_00284	GEFK01000272	334	130.12	4	---NA---
EMILISO_00285	GEFK01000273	777	41.95	3	s41a2_macfa ame: full=solute carrier family 41 member 2
EMILISO_00286	GEFK01000274	454	71.79	3	s41a2_macfa ame: full=solute carrier family 41 member 2
EMILISO_00289	GEFK01000277	716	136.57	9	bcat1_human ame: full=branched-chain-amino-acid cytosolic short=bcat ame: full=protein eca39
EMILISO_00290	GEFK01000278	489	111.09	5	bcat1_human ame: full=branched-chain-amino-acid cytosolic short=bcat ame: full=protein eca39
EMILISO_00291	GEFK01000279	667	114.02	7	aph1b_danre ame: full=gamma-secretase subunit aph-1b ame: full=anterior-pharynx-defective protein 1b
EMILISO_00292	GEFK01000280	538	181.75	9	aph1b_danre ame: full=gamma-secretase subunit aph-1b ame: full=anterior-pharynx-defective protein 1b
EMILISO_00293	GEFK01000281	657	380.35	23	philodryas olfersii cluster polf0081c cysteine-rich secretory protein complete cds
EMILISO_00294	GEFK01000282	534	488.31	24	philodryas olfersii polf0034c snake venom metalloprotease complete cds
EMILISO_00295	GEFK01000283	647	268.68	16	---NA---
EMILISO_00296	GEFK01000284	513	21.18	1	danio rerio zgc:154077 (zgc:154077) mrna
EMILISO_00297	GEFK01000285	707	122.94	8	ophiophagus hannah l-amino acid oxidase complete cds
EMILISO_00298	GEFK01000286	428	76.16	3	agkahbgloydius halys gene for prepro-halystatin 2 and partial cds
EMILISO_00299	GEFK01000287	599	399.04	22	rs3a_ophha ame: full=40s ribosomal protein s3a
EMILISO_00300	GEFK01000288	552	590.48	30	rs3a_ophha ame: full=40s ribosomal protein s3a
EMILISO_00301	GEFK01000289	610	35.62	2	agkistrodon contortrix clone e33difj02f9ucm microsatellite sequence
EMILISO_00302	GEFK01000290	495	43.9	2	agkistrodon contortrix clone e33difj02f9ucm microsatellite sequence
EMILISO_00303	GEFK01000291	746	87.38	6	---NA---
EMILISO_00304	GEFK01000292	343	126.7	4	---NA---
EMILISO_00305	GEFK01000293	573	37.92	2	anolis carolinensis protein tyrosine receptor f polypeptide interacting protein alpha 3 mrna
EMILISO_00306	GEFK01000294	517	147.11	7	lipa3_mouse ame: full=liprin-alpha-3 ame: full=protein tyrosine phosphatase receptor type f polypeptide-interacting protein alpha-3 short=ptprf-interacting protein alpha-3
EMILISO_00307	GEFK01000295	671	80.96	5	---NA---
EMILISO_00308	GEFK01000296	401	54.19	2	---NA---
EMILISO_00309	GEFK01000297	579	37.53	2	bothrops jararaca bradykinin-potentiating c-type natriuretic peptide-related pseudogene complete sequence
EMILISO_00310	GEFK01000298	485	112.01	5	---NA---
EMILISO_00311	GEFK01000299	549	59.37	3	---NA---
EMILISO_00312	GEFK01000300	494	175.95	8	loxodonta africana rap1 gtpase-activating protein 1-like mrna
EMILISO_00313	GEFK01000301	552	59.05	3	gallus gallus muscleblind-like 3 transcript variant mrna
EMILISO_00314	GEFK01000302	471	69.2	3	mus musculus adult male testis riken full-length enriched clone:4932416e18 product: full insert sequence
EMILISO_00315	GEFK01000303	544	39.94	2	---NA---
EMILISO_00316	GEFK01000304	477	45.55	2	cc125_human ame: full=coiled-coil domain-containing protein 125 ame: full=protein kenae
EMILISO_00317	GEFK01000305	529	20.54	1	psd7_mouse ame: full=26s proteasome non-atpase regulatory subunit 7 ame: full=26s proteasome regulatory subunit rpn8 ame: full=26s proteasome regulatory subunit s12 ame: full=mov34 protein ame: full=proteasome subunit p40
EMILISO_00318	GEFK01000306	488	111.32	5	psd7_human ame: full=26s proteasome non-atpase regulatory subunit 7 ame: full=26s proteasome regulatory subunit rpn8 ame: full=26s proteasome regulatory subunit s12 ame: full=mov34 protein homolog ame: full=proteasome subunit p40
EMILISO_00319	GEFK01000307	520	146.26	7	ip6k2_rabit ame: full=inositol hexakisphosphate kinase 2 short= 6 kinase 2 ame: full=p -uptake stimulator short=
EMILISO_00320	GEFK01000308	474	45.84	2	ip6k2_rabit ame: full=inositol hexakisphosphate kinase 2 short= 6 kinase 2 ame: full=p -uptake stimulator short=
EMILISO_00321	GEFK01000309	530	205	10	---NA---
EMILISO_00322	GEFK01000310	417	52.11	2	---NA---
EMILISO_00323	GEFK01000311	480	2014.52	89	ubiqp_xenla ame: full=polyubiquitin contains: ame: full=ubiquitin flags: precursor
EMILISO_00324	GEFK01000312	470	994.02	43	ubiqp_xenla ame: full=polyubiquitin contains: ame: full=ubiquitin flags: precursor
EMILISO_00325	GEFK01000313	528	82.31	4	thim_mouse ame: full=3-ketoacyl- mitochondrial ame: full=acetyl- acyltransferase ame: full=beta-ketothiolase ame: full=mitochondrial 3-oxoacyl- thiolase
EMILISO_00326	GEFK01000314	401	54.19	2	thim_mouse ame: full=3-ketoacyl- mitochondrial ame: full=acetyl- acyltransferase ame: full=beta-ketothiolase ame: full=mitochondrial 3-oxoacyl- thiolase
EMILISO_00327	GEFK01000315	572	37.99	2	zn197_human ame: full=zinc finger protein 197 ame: full=zinc finger protein with krab and scan domains 9 ame: full= 20
EMILISO_00328	GEFK01000316	350	62.08	2	zn836_human ame: full=zinc finger protein 836
EMILISO_00329	GEFK01000317	508	278.04	13	lec1_liopo ame: full=lectoxin-lio1 flags: precursor
EMILISO_00330	GEFK01000318	415	130.9	5	lec2_liopo ame: full=lectoxin-lio2 flags: precursor
EMILISO_00331	GEFK01000319	496	65.71	3	---NA---
EMILISO_00332	GEFK01000320	427	76.33	3	---NA---
EMILISO_00333	GEFK01000321	570	38.12	2	ap1b1_human ame: full=ap-1 complex subunit beta-1 ame: full=adapter-related protein complex 1 subunit beta-1 ame: full=adaptor protein complex ap-1 subunit beta-1 ame: full=beta-1-adaptin ame: full=beta-adaptin 1
EMILISO_00334	GEFK01000322	327	33.23	1	philodryas olfersii cluster polf0081c cysteine-rich secretory protein complete cds
EMILISO_00335	GEFK01000323	458	308.39	13	loxodonta africana protein bhlhb9-like mrna
EMILISO_00336	GEFK01000324	385	197.54	7	---NA---
EMILISO_00337	GEFK01000325	440	98.77	4	anolis carolinensis zinc finger protein 135-like partial mrna
EMILISO_00338	GEFK01000326	394	27.58	1	anolis carolinensis zinc finger protein 135-like partial mrna
EMILISO_00339	GEFK01000327	501	65.06	3	igll5_human ame: full=immunoglobulin lambda-like polypeptide 5 ame: full=g lambda-1 ame: full=germline immunoglobulin lambda 1 flags: precursor
EMILISO_00340	GEFK01000328	299	72.67	2	lac2_mouse ame: full=ig lambda-2 chain c region
EMILISO_00341	GEFK01000329	440	49.39	2	---NA---
EMILISO_00342	GEFK01000330	340	63.91	2	---NA---
EMILISO_00343	GEFK01000331	358	91.05	3	homo sapiens cdna flj45941 clone highly maltase- intestinal
EMILISO_00344	GEFK01000332	298	36.46	1	homo sapiens cdna flj45941 clone highly maltase- intestinal
EMILISO_00345	GEFK01000333	292	74.42	2	endonuclease-reverse transcriptase
EMILISO_00346	GEFK01000334	122	0	0	---NA---
EMILISO_00347	GEFK01000335	2946	984.69	267	ndrg2_pantr ame: full=protein ndrg2
EMILISO_00348	GEFK01000336	1317	8.25	1	ndrg2_pantr ame: full=protein ndrg2
EMILISO_00349	GEFK01000337	1042	2074.95	199	rla0_chick ame: full=60s acidic ribosomal protein p0 ame: full=60s ribosomal protein l10e
EMILISO_00350	GEFK01000338	1010	129.09	12	rla0_chick ame: full=60s acidic ribosomal protein p0 ame: full=60s ribosomal protein l10e
EMILISO_00351	GEFK01000339	910	811.88	68	rs2_human ame: full=40s ribosomal protein s2 ame: full=40s ribosomal protein s4 ame: full=protein llrep3
EMILISO_00352	GEFK01000340	759	100.2	7	rs2_human ame: full=40s ribosomal protein s2 ame: full=40s ribosomal protein s4 ame: full=protein llrep3
EMILISO_00353	GEFK01000341	1626	8245.51	1234	cox1_dinse ame: full=cytochrome c oxidase subunit 1 ame: full=cytochrome c oxidase polypeptide i
EMILISO_00354	GEFK01000342	779	1757.34	126	dictyostelium discoideum ax4 sam domain-containing protein complete cds
EMILISO_00355	GEFK01000343	644	776.06	46	dictyostelium discoideum ax4 sam domain-containing protein complete cds
EMILISO_00356	GEFK01000344	824	145.04	11	safb2_human ame: full=scaffold attachment factor b2 short=saf-b2
EMILISO_00357	GEFK01000345	445	24.42	1	safb2_human ame: full=scaffold attachment factor b2 short=saf-b2
EMILISO_00358	GEFK01000346	349	809.41	26	s10a6_chick ame: full=protein s100-a6 ame: full=calcyclin ame: full=s100 calcium-binding protein a6
EMILISO_00359	GEFK01000347	320	0	0	s10a6_chick ame: full=protein s100-a6 ame: full=calcyclin ame: full=s100 calcium-binding protein a6
EMILISO_00360	GEFK01000348	506	1760.7	82	---NA---
EMILISO_00361	GEFK01000349	6726	1203.43	745	s12a2_human ame: full=solute carrier family 12 member 2 ame: full=basolateral na-k-cl symporter ame: full=bumetanide-sensitive sodium- -chloride cotransporter 1
EMILISO_00362	GEFK01000350	6372	1166.28	684	---NA---
EMILISO_00363	GEFK01000351	6112	360.86	203	sort_human ame: full=sortilin ame: full=100 kda nt receptor ame: full=glycoprotein 95 short=gp95 ame: full=neurotensin receptor 3 short=nt3 short=ntr3 flags: precursor
EMILISO_00364	GEFK01000352	3754	714.87	247	pp1b_pig ame: full=serine threonine-protein phosphatase pp1-beta catalytic subunit short=pp-1b
EMILISO_00365	GEFK01000353	2926	946.87	255	muc5b_human ame: full=mucin-5b short=muc-5b ame: full=cervical mucin ame: full=high molecular weight salivary mucin mg1 ame: full=mucin-5 subtype tracheobronchial ame: full=sublingual gland mucin flags: precursor
EMILISO_00366	GEFK01000354	2705	2695.12	671	ef2_bovin ame: full=elongation factor 2 short=ef-2
EMILISO_00367	GEFK01000355	2660	1074.23	263	s39ad_chick ame: full=zinc transporter zip13 ame: full=solute carrier family 39 member 13 ame: full=zrt- and irt-like protein 13 short=zip-13
EMILISO_00368	GEFK01000356	2663	1509.57	370	ero1b_human ame: full=ero1-like protein beta short=ero1-l-beta ame: full=endoplasmic oxidoreductin-1-like protein b ame: full=oxidoreductin-1-l-beta flags: precursor
EMILISO_00369	GEFK01000357	2639	370.53	90	pantherophis guttatus hoxc13 complete cds and hoxc12 partial cds
EMILISO_00370	GEFK01000358	2388	136.49	30	---NA---
EMILISO_00371	GEFK01000359	2392	576.85	127	s39a6_ponab ame: full=zinc transporter zip6 ame: full=solute carrier family 39 member 6 ame: full=zrt- and irt-like protein 6 short=zip-6 flags: precursor
EMILISO_00372	GEFK01000360	2238	1441.85	297	muc5b_human ame: full=mucin-5b short=muc-5b ame: full=cervical mucin ame: full=high molecular weight salivary mucin mg1 ame: full=mucin-5 subtype tracheobronchial ame: full=sublingual gland mucin flags: precursor
EMILISO_00373	GEFK01000361	2229	292.46	60	---NA---
EMILISO_00374	GEFK01000362	2167	411.13	82	flna_human ame: full=filamin-a short=fln-a ame: full=actin-binding protein 280 short=abp-280 ame: full=alpha-filamin ame: full=endothelial actin-binding protein ame: full=filamin-1 ame: full=non-muscle filamin
EMILISO_00375	GEFK01000363	2092	197.35	38	ppal_ponab ame: full=lysosomal acid phosphatase short=lap flags: precursor
EMILISO_00376	GEFK01000364	2027	643.21	120	chle_rabit ame: full=cholinesterase ame: full=acylcholine acylhydrolase ame: full=butyrylcholine esterase ame: full=choline esterase ii ame: full=pseudocholinesterase flags: precursor
EMILISO_00377	GEFK01000365	2001	244.34	45	sytl2_mouse ame: full=synaptotagmin-like protein 2 ame: full=exophilin-4
EMILISO_00378	GEFK01000366	1986	1860.04	340	calr_cerae ame: full=calreticulin flags: precursor
EMILISO_00379	GEFK01000367	1976	214.44	39	gallus gallus insulin induced gene 1 mrna
EMILISO_00380	GEFK01000368	1926	220	39	snd1_ponab ame: full=staphylococcal nuclease domain-containing protein 1 ame: full=100 kda coactivator ame: full=p100 co-activator
EMILISO_00381	GEFK01000369	1923	237.3	42	muc5b_human ame: full=mucin-5b short=muc-5b ame: full=cervical mucin ame: full=high molecular weight salivary mucin mg1 ame: full=mucin-5 subtype tracheobronchial ame: full=sublingual gland mucin flags: precursor
EMILISO_00382	GEFK01000370	1907	569.73	100	h10_human ame: full=histone ame: full=histone h1 ame: full=histone h1
EMILISO_00383	GEFK01000371	1899	800.99	140	actg_rat ame: full= cytoplasmic 2 ame: full=gamma-actin contains: ame: full= cytoplasmic n-terminally processed
EMILISO_00384	GEFK01000372	1881	606.49	105	lin1_nycco ame: full=line-1 reverse transcriptase homolog
EMILISO_00385	GEFK01000373	1841	318.69	54	at1b1_sheep ame: full=sodium potassium-transporting atpase subunit beta-1 ame: full=sodium potassium-dependent atpase subunit beta-1
EMILISO_00386	GEFK01000374	1839	490.36	83	grp78_human ame: full=78 kda glucose-regulated protein short=grp-78 ame: full=endoplasmic reticulum lumenal ca(2+)-binding protein grp78 ame: full=heat shock 70 kda protein 5 ame: full=immunoglobulin heavy chain-binding protein short= flags: precursor
EMILISO_00387	GEFK01000375	1836	680.53	115	enpl_chick ame: full=endoplasmin ame: full=heat shock 108 kda protein short=hsp 108 short=hsp108 ame: full=heat shock protein 90 kda beta member 1 ame: full=transferrin-binding protein flags: precursor
EMILISO_00388	GEFK01000376	1825	208.37	35	calx_canfa ame: full=calnexin ame: full=pp90 flags: precursor
EMILISO_00390	GEFK01000378	1805	728.33	121	at1a1_human ame: full=sodium potassium-transporting atpase subunit alpha-1 short=na(+) k(+) atpase alpha-1 subunit ame: full=sodium pump subunit alpha-1 flags: precursor
EMILISO_00391	GEFK01000379	1799	289.89	48	kcnn4_mouse ame: full=intermediate conductance calcium-activated potassium channel protein 4 short=sk4 short=skca 4 short=skca4 ame: full=ik1 ame: full= ame: full=kca4
EMILISO_00392	GEFK01000380	1801	880.77	146	pabp1_ponab ame: full=polyadenylate-binding protein 1 short=pabp-1 short=poly -binding protein 1
EMILISO_00393	GEFK01000381	1772	496.64	81	atpb_bovin ame: full=atp synthase subunit mitochondrial flags: precursor
EMILISO_00394	GEFK01000382	1766	1519.6	247	vmat1_botat ame: full=zinc metalloproteinase atroxlysin-1 ame: full=atroxlysin-i
EMILISO_00395	GEFK01000383	1768	233.52	38	if4g2_human ame: full=eukaryotic translation initiation factor 4 gamma 2 short=eif-4-gamma 2 short=eif-4g 2 short=eif4g 2 ame: full=death-associated protein 5 short=dap-5 ame: full=p97
EMILISO_00396	GEFK01000384	1764	505.05	82	kcc1a_mouse ame: full=calcium calmodulin-dependent protein kinase type 1 ame: full= kinase i short= -ki ame: full= kinase i alpha short= -alpha
EMILISO_00397	GEFK01000385	1753	582.6	94	---NA---
EMILISO_00398	GEFK01000386	1708	4592.74	722	ef1a_chick ame: full=elongation factor 1-alpha 1 short=ef-1-alpha-1 ame: full=elongation factor tu short=ef-tu
EMILISO_00399	GEFK01000387	1668	267.06	41	copb2_mouse ame: full=coatomer subunit beta ame: full=beta -coat protein short=beta -cop ame: full=p102
EMILISO_00400	GEFK01000388	1670	260.24	40	itm2b_chick ame: full=integral membrane protein 2b ame: full=transmembrane protein e3-16
EMILISO_00401	GEFK01000389	1664	150.17	23	gallus gallus wiskott-aldrich syndrome-like mrna
EMILISO_00402	GEFK01000390	1636	365.26	55	orf2-encoded protein
EMILISO_00403	GEFK01000391	1613	498.45	74	stt3a_bovin ame: full=dolichyl-diphosphooligosaccharide--protein glycosyltransferase subunit stt3a short=oligosaccharyl transferase subunit stt3a short=stt3-a
EMILISO_00404	GEFK01000392	1606	358.55	53	tpd52_rabit ame: full=tumor protein d52 ame: full=28 kda calcium-dependent phosphoprotein ame: full=pp28
EMILISO_00405	GEFK01000393	1598	183.57	27	---NA---
EMILISO_00406	GEFK01000394	1601	332.53	49	---NA---
EMILISO_00407	GEFK01000395	1594	265.83	39	hmcn1_human ame: full=hemicentin-1 ame: full=fibulin-6 short=fibl-6 flags: precursor
EMILISO_00408	GEFK01000396	1591	341.45	50	atpa_ponab ame: full=atp synthase subunit mitochondrial flags: precursor
EMILISO_00409	GEFK01000397	1585	287.9	42	if4b_human ame: full=eukaryotic translation initiation factor 4b short=eif-4b
EMILISO_00410	GEFK01000398	1563	3308.8	476	---NA---
EMILISO_00411	GEFK01000399	1563	125.12	18	---NA---
EMILISO_00412	GEFK01000400	1554	1985.59	284	nu4m_dinse ame: full=nadh-ubiquinone oxidoreductase chain 4 ame: full=nadh dehydrogenase subunit 4
EMILISO_00413	GEFK01000401	1548	484.28	69	a2mg_bovin ame: full=alpha-2-macroglobulin short=alpha-2-m flags: precursor
EMILISO_00414	GEFK01000402	1543	232.37	33	mus musculus 12 days embryo eyeball riken full-length enriched clone:d230045e19 product: full insert sequence
EMILISO_00415	GEFK01000403	1534	1196.97	169	pdia3_chick ame: full=protein disulfide-isomerase a3 ame: full=endoplasmic reticulum resident protein 57 short=er protein 57 short=erp57 ame: full=glucose-regulated thiol oxidoreductase 58 kda protein flags: precursor
EMILISO_00416	GEFK01000404	1507	281.17	39	reverse transcriptase-like protein
EMILISO_00417	GEFK01000405	1485	321.92	44	if4g2_human ame: full=eukaryotic translation initiation factor 4 gamma 2 short=eif-4-gamma 2 short=eif-4g 2 short=eif4g 2 ame: full=death-associated protein 5 short=dap-5 ame: full=p97
EMILISO_00418	GEFK01000406	1475	265.18	36	eif3b_bovin ame: full=eukaryotic translation initiation factor 3 subunit b short=eif3b ame: full=eukaryotic translation initiation factor 3 subunit 9 ame: full=eif-3-eta
EMILISO_00419	GEFK01000407	1462	431.03	58	---NA---
EMILISO_00420	GEFK01000408	1456	1708.82	229	nu5m_dinse ame: full=nadh-ubiquinone oxidoreductase chain 5 ame: full=nadh dehydrogenase subunit 5
EMILISO_00421	GEFK01000409	1444	662.12	88	---NA---
EMILISO_00422	GEFK01000410	1429	1733.51	228	tsn1_human ame: full=tetraspanin-1 short=tspan-1 ame: full=tetraspan net-1 ame: full=tetraspanin tm4-c
EMILISO_00423	GEFK01000411	1429	501.8	66	vegfa_vipaa ame: full=vascular endothelial growth factor a flags: precursor
EMILISO_00424	GEFK01000412	1415	299.45	39	hmgb1_human ame: full=high mobility group protein b1 ame: full=high mobility group protein 1 short=hmg-1
EMILISO_00425	GEFK01000413	1416	291.57	38	zinc finger protein 224- partial
EMILISO_00426	GEFK01000414	1415	3877.55	505	---NA---
EMILISO_00427	GEFK01000415	1404	1346.5	174	tctp_chick ame: full=translationally-controlled tumor protein homolog short=tctp ame: full=p23 ame: full=pchk23
EMILISO_00428	GEFK01000416	1395	116.83	15	tor1b_mouse ame: full=torsin-1b ame: full=torsin family 1 member b flags: precursor
EMILISO_00429	GEFK01000417	1390	648.76	83	actg_ranle ame: full= cytoplasmic 2 ame: full=cytoplasmic actin type 5 ame: full=gamma-actin contains: ame: full= cytoplasmic n-terminally processed
EMILISO_00430	GEFK01000418	1379	275.76	35	---NA---
EMILISO_00431	GEFK01000419	1368	222.38	28	tcpa_human ame: full=t-complex protein 1 subunit alpha short=tcp-1-alpha ame: full=cct-alpha
EMILISO_00432	GEFK01000420	1365	557.17	70	chit1_human ame: full=chitotriosidase-1 ame: full=chitinase-1 flags: precursor
EMILISO_00433	GEFK01000421	1365	453.7	57	hs90b_ponab ame: full=heat shock protein hsp 90-beta
EMILISO_00434	GEFK01000422	1355	914.09	114	rgs2_bovin ame: full=regulator of g-protein signaling 2 short=rgs2
EMILISO_00435	GEFK01000423	1349	257.73	32	hsp7c_ponab ame: full=heat shock cognate 71 kda protein ame: full=heat shock 70 kda protein 8
EMILISO_00436	GEFK01000424	1344	363.78	45	a2mg_human ame: full=alpha-2-macroglobulin short=alpha-2-m ame: full=c3 and pzp-like alpha-2-macroglobulin domain-containing protein 5 flags: precursor
EMILISO_00437	GEFK01000425	1334	293.2	36	vigln_chick ame: full=vigilin
EMILISO_00438	GEFK01000426	1325	319.79	39	mpcp_ponab ame: full=phosphate carrier mitochondrial ame: full=phosphate transport protein short=ptp ame: full=solute carrier family 25 member 3 flags: precursor
EMILISO_00439	GEFK01000427	1321	583.95	71	adt3_human ame: full=adp atp translocase 3 ame: full= carrier protein 3 ame: full= carrier isoform t2 short=ant 2 ame: full=adenine nucleotide translocator 3 short=ant 3 ame: full=solute carrier family 25 member 6
EMILISO_00440	GEFK01000428	1317	321.74	39	hnrh1_human ame: full=heterogeneous nuclear ribonucleoprotein h short=hnrnp h contains: ame: full=heterogeneous nuclear ribonucleoprotein n-terminally processed
EMILISO_00441	GEFK01000429	1303	250.15	30	bzw1_human ame: full=basic leucine zipper and w2 domain-containing protein 1 ame: full=protein orf
EMILISO_00442	GEFK01000430	1294	562.55	67	itm2a_human ame: full=integral membrane protein 2a ame: full=protein e25
EMILISO_00443	GEFK01000431	1285	828.6	98	ef1g_rabit ame: full=elongation factor 1-gamma short=ef-1-gamma ame: full=eef-1b gamma
EMILISO_00444	GEFK01000432	1286	177.42	21	gors2_human ame: full=golgi reassembly-stacking protein 2 short=grs2 ame: full=golgi phosphoprotein 6 short=golph6 ame: full=golgi reassembly-stacking protein of 55 kda short=grasp55 ame: full=p59
EMILISO_00445	GEFK01000433	1277	229.72	27	bpil3_human ame: full=bactericidal permeability-increasing 3 flags: precursor
EMILISO_00446	GEFK01000434	1276	476.83	56	philodryas olfersii c-type natriuretic peptide complete cds
EMILISO_00447	GEFK01000435	1272	136.66	16	catl1_pig ame: full=cathepsin l1 contains: ame: full=cathepsin l1 heavy chain contains: ame: full=cathepsin l1 light chain flags: precursor
EMILISO_00448	GEFK01000436	1272	128.12	15	canis familiaris cytoplasmic polyadenylation element binding protein transcript variant 2 mrna
EMILISO_00449	GEFK01000437	1260	267.31	31	roa3_human ame: full=heterogeneous nuclear ribonucleoprotein a3 short=hnrnp a3
EMILISO_00450	GEFK01000438	1263	129.04	15	retrotransposable element tf2 155 kda protein type 1-like
EMILISO_00451	GEFK01000439	1256	250.86	29	flna_human ame: full=filamin-a short=fln-a ame: full=actin-binding protein 280 short=abp-280 ame: full=alpha-filamin ame: full=endothelial actin-binding protein ame: full=filamin-1 ame: full=non-muscle filamin
EMILISO_00452	GEFK01000440	1259	172.59	20	dc1i2_mouse ame: full=cytoplasmic dynein 1 intermediate chain 2 ame: full=cytoplasmic dynein intermediate chain 2 ame: full=dynein intermediate chain cytosolic short=dh ic-2
EMILISO_00453	GEFK01000441	1257	285.23	33	reverse transcriptase-like protein
EMILISO_00454	GEFK01000442	1259	647.23	75	atf4_human ame: full=cyclic amp-dependent transcription factor atf-4 short=camp-dependent transcription factor atf-4 ame: full=activating transcription factor 4
EMILISO_00455	GEFK01000443	1257	1279.23	148	rl4_human ame: full=60s ribosomal protein l4 ame: full=60s ribosomal protein l1
EMILISO_00456	GEFK01000444	1254	589.16	68	qpct_boiir ame: full=glutaminyl-peptide cyclotransferase ame: full=glutaminyl cyclase short=qc ame: full=glutaminyl-trna cyclotransferase flags: precursor
EMILISO_00457	GEFK01000445	1245	296.71	34	insi1_human ame: full=insulin-induced gene 1 protein short=insig-1
EMILISO_00458	GEFK01000446	1241	910.51	104	vmmoc_najmo ame: full=zinc metalloproteinase mocarhagin-1 short=moc flags: precursor
EMILISO_00459	GEFK01000447	1238	272.06	31	calm_rat ame: full=calmodulin short=
EMILISO_00460	GEFK01000448	1229	176.81	20	ccpg1_chick ame: full=cell cycle progression protein 1
EMILISO_00461	GEFK01000449	1222	177.82	20	---NA---
EMILISO_00462	GEFK01000450	1228	221.19	25	at2a2_canfa ame: full=sarcoplasmic endoplasmic reticulum calcium atpase 2 short=serca2 short=sr ca(2+)-atpase 2 ame: full=calcium pump 2
EMILISO_00463	GEFK01000451	1217	249.97	28	ighm_human ame: full=ig mu chain c region
EMILISO_00464	GEFK01000452	1223	328.7	37	ost48_chick ame: full=dolichyl-diphosphooligosaccharide--protein glycosyltransferase 48 kda subunit short=ddost 48 kda subunit short=oligosaccharyl transferase 48 kda subunit ame: full=ost 50 kda subunit
EMILISO_00465	GEFK01000453	1186	283.99	31	---NA---
EMILISO_00466	GEFK01000454	1186	219.86	24	cbs_human ame: full=cystathionine beta-synthase ame: full=beta-thionase ame: full=serine sulfhydrase
EMILISO_00467	GEFK01000455	1175	453.09	49	at1a1_bovin ame: full=sodium potassium-transporting atpase subunit alpha-1 short=na(+) k(+) atpase alpha-1 subunit ame: full=sodium pump subunit alpha-1 flags: precursor
EMILISO_00468	GEFK01000456	1167	353.78	38	sc11c_canfa ame: full=signal peptidase complex catalytic subunit sec11c ame: full=microsomal signal peptidase 21 kda subunit short=spase 21 kda subunit ame: full=sec11 homolog c ame: full=sec11-like protein 3 ame: full=spc21
EMILISO_00469	GEFK01000457	1164	270.69	29	npdc1_mouse ame: full=neural proliferation differentiation and control protein 1 short=npdc-1 flags: precursor
EMILISO_00470	GEFK01000458	1166	121.13	13	smca2_mouse ame: full=probable global transcription activator snf2l2 ame: full=atp-dependent helicase smarca2 ame: full=brg1-associated factor 190b short=baf190b
EMILISO_00471	GEFK01000459	1167	186.2	20	hnrl2_human ame: full=heterogeneous nuclear ribonucleoprotein u-like protein 2 ame: full=scaffold-attachment factor a2 short=saf-a2
EMILISO_00472	GEFK01000460	1164	308.02	33	pim3_cotja ame: full=serine threonine-protein kinase pim-3 ame: full=qpim
EMILISO_00473	GEFK01000461	1162	336.6	36	---NA---
EMILISO_00474	GEFK01000462	1155	197.54	21	danio rerio homeo box (expressed in es cells) mrna (cdna clone mgc:193787 image:9037911) complete cds
EMILISO_00475	GEFK01000463	1149	444.43	47	qsox1_chick ame: full=sulfhydryl oxidase 1 ame: full=quiescin q6 flags: precursor
EMILISO_00476	GEFK01000464	1146	559.36	59	g3p_trisi ame: full=glyceraldehyde-3-phosphate dehydrogenase short=gapdh ame: full=peptidyl-cysteine s-nitrosylase gapdh
EMILISO_00477	GEFK01000465	1144	294.41	31	hyou1_danre ame: full=hypoxia up-regulated protein 1 flags: precursor
EMILISO_00478	GEFK01000466	1143	199.62	21	acts_chick ame: full= alpha skeletal muscle ame: full=alpha-actin-1 flags: precursor
EMILISO_00479	GEFK01000467	1132	182.36	19	stt3b_mouse ame: full=dolichyl-diphosphooligosaccharide--protein glycosyltransferase subunit stt3b short=oligosaccharyl transferase subunit stt3b short=stt3-b ame: full=b6dom1 antigen ame: full=source of immunodominant mhc-associated peptides
EMILISO_00480	GEFK01000468	1135	430.76	45	fxyd domain-containing ion transport regulator 5-like
EMILISO_00481	GEFK01000469	1129	288.7	30	sync_human ame: full=asparaginyl-trna cytoplasmic ame: full=asparagine--trna ligase short=
EMILISO_00482	GEFK01000470	1123	145.12	15	azemiops feae clone afe-22 complete sequence
EMILISO_00483	GEFK01000471	1127	482.02	50	aqp5_human ame: full=aquaporin-5 short=aqp-5
EMILISO_00484	GEFK01000472	1114	234.07	24	a1m_rat ame: full=alpha-1-macroglobulin short=alpha-1-m ame: full=alpha-1-macroglobulin 165 kda subunit contains: ame: full=alpha-1-macroglobulin 45 kda subunit flags: precursor
EMILISO_00485	GEFK01000473	1113	302.61	31	ddx21_human ame: full=nucleolar rna helicase 2 ame: full=dead box protein 21 ame: full=gu-alpha ame: full=nucleolar rna helicase gu ame: full=nucleolar rna helicase ii ame: full=rh ii gu
EMILISO_00486	GEFK01000474	1110	1624.83	166	gblp_rat ame: full=guanine nucleotide-binding protein subunit beta-2-like 1 ame: full=receptor for activated c kinase ame: full=receptor of activated protein kinase c 1 short=rack1
EMILISO_00487	GEFK01000475	1102	236.62	24	ampn_chick ame: full=aminopeptidase n ame: full=aminopeptidase ey
EMILISO_00488	GEFK01000476	1103	108.35	11	---NA---
EMILISO_00489	GEFK01000477	1102	177.47	18	rap1b_mouse ame: full=ras-related protein rap-1b ame: full=gtp-binding protein smg p21b flags: precursor
EMILISO_00490	GEFK01000478	1100	197.54	20	rod1_rat ame: full=regulator of differentiation 1 short=rod1
EMILISO_00491	GEFK01000479	1098	2543.04	257	cyb_farab ame: full=cytochrome b ame: full=complex iii subunit 3 ame: full=complex iii subunit iii ame: full=cytochrome b-c1 complex subunit 3 ame: full=ubiquinol-cytochrome-c reductase complex cytochrome b subunit
EMILISO_00492	GEFK01000480	1095	357.2	36	ampe_pig ame: full=glutamyl aminopeptidase short=eap ame: full=aminopeptidase a short=ap-a ame: cd_antigen=cd249
EMILISO_00493	GEFK01000481	1078	221.73	22	eif3e_human ame: full=eukaryotic translation initiation factor 3 subunit e short=eif3e ame: full=eukaryotic translation initiation factor 3 subunit 6 ame: full=viral integration site protein int-6 homolog ame: full=eif-3 p48
EMILISO_00494	GEFK01000482	1076	191.85	19	ma1a2_human ame: full=mannosyl-oligosaccharide -alpha-mannosidase ib ame: full=mannosidase alpha class 1a member 2 ame: full=processing alpha- -mannosidase ib short=alpha- -mannosidase ib
EMILISO_00495	GEFK01000483	1076	131.27	13	uncharacterized protein kiaa0467-like
EMILISO_00496	GEFK01000484	1068	193.29	19	fnd3a_mouse ame: full=fibronectin type-iii domain-containing protein 3a
EMILISO_00497	GEFK01000485	1073	101.26	10	txnd5_human ame: full=thioredoxin domain-containing protein 5 ame: full=endoplasmic reticulum resident protein 46 short=er protein 46 short=erp46 ame: full=thioredoxin-like protein p46 flags: precursor
EMILISO_00498	GEFK01000486	1072	608.11	60	rl3_mouse ame: full=60s ribosomal protein l3 ame: full=j1 protein
EMILISO_00499	GEFK01000487	1068	447.61	44	bothrops jararaca toxin 1 partial cds
EMILISO_00500	GEFK01000488	1072	527.03	52	cirbp_human ame: full=cold-inducible rna-binding protein ame: full=a18 hnrnp ame: full=glycine-rich rna-binding protein cirp
EMILISO_00501	GEFK01000489	1054	257.7	25	---NA---
EMILISO_00502	GEFK01000490	1069	274.42	27	1433t_chick ame: full=14-3-3 protein theta
EMILISO_00503	GEFK01000491	1066	428.07	42	eif1_mouse ame: full=eukaryotic translation initiation factor 1 short=eif1 ame: full=protein translation factor sui1 homolog
EMILISO_00504	GEFK01000492	1059	3375.38	329	zp3r_mouse ame: full=zona pellucida sperm-binding protein 3 receptor ame: full=sperm fertilization protein 56 short=sp56 flags: precursor
EMILISO_00505	GEFK01000493	1047	103.77	10	anolis carolinensis succinyl- ligase subunit mitochondrial-like mrna
EMILISO_00506	GEFK01000494	1060	491.99	48	tetraodon nigroviridis full-length cdna
EMILISO_00507	GEFK01000495	1061	327.69	32	brugia malayi t-cell receptor beta chain ana 11 partial mrna
EMILISO_00508	GEFK01000496	1057	277.53	27	k1c19_chick ame: full= type i cytoskeletal 19 ame: full=cytokeratin-19 short=ck-19 ame: full=gk-19 ame: full=keratin-19 short=k19
EMILISO_00509	GEFK01000497	1044	291.39	28	set_human ame: full=protein set ame: full=hla-dr-associated protein ii ame: full=inhibitor of granzyme a-activated dnase short=igaad ame: full=phapii ame: full=phosphatase 2a inhibitor i2pp2a short=i-2pp2a ame: full=template-activating factor i short=taf-i
EMILISO_00510	GEFK01000498	1045	332.7	32	acod_cypca ame: full=acyl- desaturase ame: full=delta -desaturase short=delta-9 desaturase ame: full=fatty acid desaturase ame: full=stearoyl- desaturase
EMILISO_00511	GEFK01000499	1039	324.17	31	rpn1_mouse ame: full=dolichyl-diphosphooligosaccharide--protein glycosyltransferase subunit 1 ame: full=dolichyl-diphosphooligosaccharide--protein glycosyltransferase 67 kda subunit ame: full=ribophorin i short=rpn-i ame: full=ribophorin-1 flags: precursor
EMILISO_00512	GEFK01000500	1037	167.63	16	gslg1_chick ame: full=golgi apparatus protein 1 ame: full=cysteine-rich fibroblast growth factor receptor flags: precursor
EMILISO_00513	GEFK01000501	1036	293.64	28	prr7_mouse ame: full=proline-rich protein 7 ame: full=synaptic proline-rich membrane protein
EMILISO_00514	GEFK01000502	1032	263.2	25	mylip_rat ame: full=e3 ubiquitin-protein ligase mylip ame: full=inducible degrader of the ldl-receptor short=idol ame: full=myosin regulatory light chain interacting protein short=mir
EMILISO_00515	GEFK01000503	1026	180.02	17	k2c75_rat ame: full= type ii cytoskeletal 75 ame: full=cytokeratin-75 short=ck-75 ame: full=keratin-6 hair follicle ame: full=keratin-75 short=k75 ame: full=type ii keratin-k6hf ame: full=type-ii keratin kb18
EMILISO_00516	GEFK01000504	1012	869.62	81	sftpd_rat ame: full=pulmonary surfactant-associated protein d short=psp-d short=sp-d ame: full=cp4 ame: full=lung surfactant protein d flags: precursor
EMILISO_00517	GEFK01000505	1012	611.95	57	bi1_bovin ame: full=bax inhibitor 1 short=bi-1 ame: full=testis-enhanced gene transcript protein ame: full=transmembrane bax inhibitor motif-containing protein 6
EMILISO_00518	GEFK01000506	1013	353.94	33	arf4_bovin ame: full=adp-ribosylation factor 4
EMILISO_00519	GEFK01000507	1013	289.59	27	sep15_danre ame: full=15 kda selenoprotein flags: precursor
EMILISO_00520	GEFK01000508	1006	442.8	41	ef1d_rat ame: full=elongation factor 1-delta short=ef-1-delta
EMILISO_00521	GEFK01000509	1005	140.54	13	rtf23_schpo ame: full=retrotransposable element tf2 155 kda protein type 3
EMILISO_00522	GEFK01000510	1003	281.64	26	prs6a_rat ame: full=26s protease regulatory subunit 6a ame: full=26s proteasome aaa-atpase subunit rpt5 ame: full=proteasome 26s subunit atpase 3 ame: full=spermatogenic cell sperm-associated tat-binding protein homolog sata ame: full=tat-binding protein 1 short=tbp-1
EMILISO_00523	GEFK01000511	1001	108.54	10	---NA---
EMILISO_00524	GEFK01000512	1000	282.49	26	vdac2_melga ame: full=voltage-dependent anion-selective channel protein 2 short=vdac-2 ame: full=outer mitochondrial membrane protein porin 2
EMILISO_00525	GEFK01000513	995	185.63	17	wasl_mouse ame: full=neural wiskott-aldrich syndrome protein short=n-wasp
EMILISO_00526	GEFK01000514	996	141.81	13	fam3d_mouse ame: full=protein fam3d ame: full=oncoprotein-induced protein 1 ame: full=protein ef-7 flags: precursor
EMILISO_00527	GEFK01000515	993	218.83	20	s4a4_bovin ame: full=electrogenic sodium bicarbonate cotransporter 1 short=sodium bicarbonate cotransporter ame: full=solute carrier family 4 member 4
EMILISO_00528	GEFK01000516	994	273.26	25	tmed7_human ame: full=transmembrane emp24 domain-containing protein 7 flags: precursor
EMILISO_00529	GEFK01000517	995	251.15	23	ampb_rat ame: full=aminopeptidase b short=ap-b ame: full=arginine aminopeptidase ame: full=arginyl aminopeptidase ame: full=cytosol aminopeptidase iv
EMILISO_00530	GEFK01000518	989	131.83	12	slmap_rabit ame: full=sarcolemmal membrane-associated protein short=sarcolemmal-associated protein
EMILISO_00531	GEFK01000519	989	307.6	28	zea mays loc100381862 mrna
EMILISO_00532	GEFK01000520	986	231.4	21	cbpd_mouse ame: full=carboxypeptidase d ame: full=metallocarboxypeptidase d ame: full=gp180 flags: precursor
EMILISO_00533	GEFK01000521	982	276.6	25	sorcn_human ame: full=sorcin ame: full=22 kda protein ame: full=cp-22 short=cp22 ame: full=v19
EMILISO_00535	GEFK01000523	985	441.21	40	ampe_bovin ame: full=glutamyl aminopeptidase short=eap ame: full=aminopeptidase a short=ap-a ame: cd_antigen=cd249
EMILISO_00536	GEFK01000524	977	366.98	33	equus caballus 14-3-3 protein epsilon-like mrna
EMILISO_00537	GEFK01000525	981	675.59	61	cnbp_chick ame: full=cellular nucleic acid-binding protein short=cnbp ame: full=zinc finger protein 9
EMILISO_00538	GEFK01000526	983	143.69	13	dhe3_rat ame: full=glutamate dehydrogenase mitochondrial short=gdh 1 ame: full=memory-related gene 2 protein short=mrg-2 flags: precursor
EMILISO_00539	GEFK01000527	978	111.09	10	---NA---
EMILISO_00540	GEFK01000528	980	321.51	29	gale_human ame: full=udp-glucose 4-epimerase ame: full=galactowaldenase ame: full=udp-galactose 4-epimerase
EMILISO_00541	GEFK01000529	973	89.33	8	srbs1_mouse ame: full=sorbin and sh3 domain-containing protein 1 ame: full=ponsin ame: full=sh3 domain protein 5 ame: full=sh3p12 ame: full=c-cbl-associated protein short=cap
EMILISO_00542	GEFK01000530	976	122.45	11	dldh_mouse ame: full=dihydrolipoyl mitochondrial ame: full=dihydrolipoamide dehydrogenase flags: precursor
EMILISO_00543	GEFK01000531	976	445.28	40	tpm4_pig ame: full=tropomyosin alpha-4 chain ame: full=tropomyosin-4
EMILISO_00544	GEFK01000532	973	111.66	10	---NA---
EMILISO_00545	GEFK01000533	974	524.28	47	cd63_human ame: full=cd63 antigen ame: full=granulophysin ame: full=lysosomal-associated membrane protein 3 short=lamp-3 ame: full=melanoma-associated antigen me491
EMILISO_00546	GEFK01000534	966	236.19	21	---NA---
EMILISO_00547	GEFK01000535	967	157.3	14	s4a4_bovin ame: full=electrogenic sodium bicarbonate cotransporter 1 short=sodium bicarbonate cotransporter ame: full=solute carrier family 4 member 4
EMILISO_00548	GEFK01000536	967	213.48	19	s39aa_human ame: full=zinc transporter zip10 ame: full=solute carrier family 39 member 10 ame: full=zrt- and irt-like protein 10 short=zip-10 flags: precursor
EMILISO_00549	GEFK01000537	963	541.55	48	kcrb_chick ame: full=creatine kinase b-type ame: full=b-ck ame: full=creatine kinase b chain
EMILISO_00550	GEFK01000538	954	273.33	24	anolis carolinensis nucleobindin 2 mrna
EMILISO_00551	GEFK01000539	962	937.4	83	nu2m_dinse ame: full=nadh-ubiquinone oxidoreductase chain 2 ame: full=nadh dehydrogenase subunit 2
EMILISO_00552	GEFK01000540	958	102.07	9	pantherophis guttatus hoxc13 complete cds and hoxc12 partial cds
EMILISO_00553	GEFK01000541	957	908.24	80	gpx3_rat ame: full=glutathione peroxidase 3 short=gpx-3 short=gshpx-3 ame: full=plasma glutathione peroxidase short=gpx-p short=gshpx-p flags: precursor
EMILISO_00554	GEFK01000542	956	340.95	30	edem3_mouse ame: full=er degradation-enhancing alpha-mannosidase-like 3 flags: precursor
EMILISO_00555	GEFK01000543	949	80.14	7	ilf2_human ame: full=interleukin enhancer-binding factor 2 ame: full=nuclear factor of activated t-cells 45 kda
EMILISO_00556	GEFK01000544	949	103.04	9	sf3b1_human ame: full=splicing factor 3b subunit 1 ame: full=pre-mrna-splicing factor sf3b 155 kda subunit short=sf3b155 ame: full=spliceosome-associated protein 155 short=sap 155
EMILISO_00557	GEFK01000545	951	159.94	14	b3gn2_human ame: full=udp- c:betagal beta- -n-acetylglucosaminyltransferase 2 short=b -2 short=beta- -gn-t2 short=beta- -n-acetylglucosaminyltransferase 2 short=beta3gn-t2
EMILISO_00558	GEFK01000546	948	240.68	21	vime_chick ame: full=vimentin
EMILISO_00559	GEFK01000547	944	80.57	7	dpp3_human ame: full=dipeptidyl peptidase 3 ame: full=dipeptidyl aminopeptidase iii ame: full=dipeptidyl arylamidase iii ame: full=dipeptidyl peptidase iii short=dpp iii
EMILISO_00560	GEFK01000548	943	241.95	21	---NA---
EMILISO_00561	GEFK01000549	947	252.4	22	if5_rat ame: full=eukaryotic translation initiation factor 5 short=eif-5
EMILISO_00562	GEFK01000550	942	853.5	74	tecta_mouse ame: full=alpha-tectorin flags: precursor
EMILISO_00563	GEFK01000551	936	81.25	7	ubp46_danre ame: full=ubiquitin carboxyl-terminal hydrolase 46 ame: full=deubiquitinating enzyme 46 ame: full=ubiquitin thiolesterase 46 ame: full=ubiquitin-specific-processing protease 46
EMILISO_00564	GEFK01000552	935	69.72	6	kibra_xentr ame: full=protein kibra ame: full=ww domain-containing protein 1
EMILISO_00565	GEFK01000553	929	187.12	16	reep5_human ame: full=receptor expression-enhancing protein 5 ame: full=polyposis locus protein 1 ame: full=protein tb2
EMILISO_00566	GEFK01000554	932	442.99	38	b3gn2_mouse ame: full=udp- c:betagal beta- -n-acetylglucosaminyltransferase 2 short=b -2 short=beta- -gn-t2 short=beta- -n-acetylglucosaminyltransferase 2 short=beta3gn-t2 ame: full=beta- -n-acetylglucosaminyltransferase
EMILISO_00567	GEFK01000555	931	233.4	20	mus musculus 3 days neonate thymus riken full-length enriched clone:a630053j03 product: full insert sequence
EMILISO_00568	GEFK01000556	931	151.71	13	copb_chick ame: full=coatomer subunit beta ame: full=beta-coat protein short=beta-cop
EMILISO_00569	GEFK01000557	925	505.07	43	spcs3_canfa ame: full=signal peptidase complex subunit 3 ame: full=microsomal signal peptidase 22 23 kda subunit short=spc22 23 short=spase 22 23 kda subunit
EMILISO_00570	GEFK01000558	923	70.63	6	sjchgc04878 protein
EMILISO_00571	GEFK01000559	921	188.75	16	cbpd_anapl ame: full=carboxypeptidase d ame: full=metallocarboxypeptidase d ame: full=gp180 ame: full=p170 flags: precursor
EMILISO_00572	GEFK01000560	906	143.9	12	thermophis baileyi microsatellite 08 sequence
EMILISO_00573	GEFK01000561	911	166.97	14	---NA---
EMILISO_00574	GEFK01000562	916	498.17	42	vmmoc_najmo ame: full=zinc metalloproteinase mocarhagin-1 short=moc flags: precursor
EMILISO_00575	GEFK01000563	910	214.91	18	sytl2_human ame: full=synaptotagmin-like protein 2 ame: full=breast cancer-associated antigen sga-72m ame: full=exophilin-4
EMILISO_00576	GEFK01000564	912	357.4	30	s61a1_bovin ame: full=protein transport protein sec61 subunit alpha isoform 1 short=sec61 alpha-1
EMILISO_00577	GEFK01000565	913	83.3	7	gp125_human ame: full=probable g-protein coupled receptor 125 flags: precursor
EMILISO_00578	GEFK01000566	913	238	20	prrc1_chick ame: full=protein prrc1 ame: full=proline-rich and coiled-coil-containing protein 1
EMILISO_00579	GEFK01000567	912	142.96	12	mus musculus 16 days embryo head riken full-length enriched clone:c130032n12 product:hypothetical sterile alpha motif homology containing full insert sequence
EMILISO_00580	GEFK01000568	906	155.9	13	bi2l1_mouse ame: full=brain-specific angiogenesis inhibitor 1-associated protein 2-like protein 1 short=bai1-associated protein 2-like protein 1 ame: full=insulin receptor tyrosine kinase substrate
EMILISO_00581	GEFK01000569	903	721.92	60	---NA---
EMILISO_00582	GEFK01000570	909	2055.83	172	nu1m_dinse ame: full=nadh-ubiquinone oxidoreductase chain 1 ame: full=nadh dehydrogenase subunit 1
EMILISO_00583	GEFK01000571	906	71.95	6	pantherophis guttatus hoxc13 complete cds and hoxc12 partial cds
EMILISO_00584	GEFK01000572	902	313.18	26	mcp_bovin ame: full=membrane cofactor protein ame: cd_antigen=cd46 flags: precursor
EMILISO_00585	GEFK01000573	897	193.8	16	sahh2_mouse ame: full= adenosylhomocysteinase 2 short= cyase 2 ame: full=ip3r-binding protein released with inositol -trisphosphate ame: full=s-adenosyl-l-homocysteine hydrolase 2 ame: full=s-adenosylhomocysteine hydrolase-like protein 1
EMILISO_00586	GEFK01000574	903	168.45	14	alligator mississippiensis hsp70-bp mrna for heat shock protein 70-binding complete cds
EMILISO_00587	GEFK01000575	891	170.72	14	rhinoplocephalus nigrescens clone rn117 microsatellite sequence
EMILISO_00588	GEFK01000576	892	60.9	5	agkistrodon contortrix clone e33difj02fpiag microsatellite sequence
EMILISO_00589	GEFK01000577	896	157.64	13	grsf1_human ame: full=g-rich sequence factor 1 short=grsf-1
EMILISO_00590	GEFK01000578	896	109.13	9	rn103_human ame: full=e3 ubiquitin-protein ligase rnf103 ame: full=kf-1 short=hkf-1 ame: full=ring finger protein 103 ame: full=zinc finger protein 103 homolog short=zfp-103
EMILISO_00591	GEFK01000579	895	412.74	34	copd_bovin ame: full=coatomer subunit delta ame: full=archain ame: full=delta-coat protein short=delta-cop
EMILISO_00592	GEFK01000580	891	231.69	19	homo sapiens high density lipoprotein binding protein transcript variant mrna
EMILISO_00593	GEFK01000581	883	61.52	5	---NA---
EMILISO_00594	GEFK01000582	889	317.76	26	g7c_rat ame: full=protein g7c flags: precursor
EMILISO_00595	GEFK01000583	886	331.1	27	rab2a_chick ame: full=ras-related protein rab-2a
EMILISO_00596	GEFK01000584	885	147.32	12	irx2_xenla ame: full=iroquois-class homeodomain protein irx-2 short=irx2-a ame: full=iroquois homeobox protein 2 short=xiro2
EMILISO_00597	GEFK01000585	887	110.24	9	k2c8_human ame: full= type ii cytoskeletal 8 ame: full=cytokeratin-8 short=ck-8 ame: full=keratin-8 short=k8 ame: full=type-ii keratin kb8
EMILISO_00598	GEFK01000586	884	147.49	12	agkistrodon contortrix clone e33difj02fpiag microsatellite sequence
EMILISO_00599	GEFK01000587	882	258.69	21	sqstm_human ame: full=sequestosome-1 ame: full=ebi3-associated protein of 60 kda short=ebiap short=p60 ame: full=phosphotyrosine-independent ligand for the lck sh2 domain of 62 kda ame: full=ubiquitin-binding protein p62
EMILISO_00600	GEFK01000588	886	539.56	44	---NA---
EMILISO_00601	GEFK01000589	885	368.3	30	eif3m_chick ame: full=eukaryotic translation initiation factor 3 subunit m short=eif3m
EMILISO_00602	GEFK01000590	884	159.78	13	---NA---
EMILISO_00603	GEFK01000591	884	368.72	30	sera_macfa ame: full=d-3-phosphoglycerate dehydrogenase short=3-pgdh
EMILISO_00604	GEFK01000592	875	99.34	8	pr15l_human ame: full=proline-rich protein 15-like protein ame: full=protein atad4
EMILISO_00605	GEFK01000593	873	311.13	25	Lodderomyces elongisporus NRRL YB-4239 conserved hypothetical protein (LELG_00796) partial mRNA
EMILISO_00606	GEFK01000594	873	87.12	7	entp6_human ame: full=ectonucleoside triphosphate diphosphohydrolase 6 short=ntpdase 6 ame: full=cd39 antigen-like 2
EMILISO_00607	GEFK01000595	876	260.46	21	k1c15_rat ame: full= type i cytoskeletal 15 ame: full=cytokeratin-15 short=ck-15 ame: full=keratin-15 short=k15 ame: full=type i keratin ka15
EMILISO_00608	GEFK01000596	874	111.88	9	ru17_mouse ame: full=u1 small nuclear ribonucleoprotein 70 kda short=u1 snrnp 70 kda short=u1-70k short=snrnp70
EMILISO_00609	GEFK01000597	872	1457.78	117	---NA---
EMILISO_00610	GEFK01000598	870	99.91	8	traf4_mouse ame: full=tnf receptor-associated factor 4 ame: full=cysteine-rich motif associated to ring and traf domains protein 1
EMILISO_00611	GEFK01000599	869	75.02	6	ecm1_mouse ame: full=extracellular matrix protein 1 ame: full=secretory component p85 flags: precursor
EMILISO_00612	GEFK01000600	868	112.65	9	anolis carolinensis leukocyte receptor cluster member 8 homolog mrna
EMILISO_00613	GEFK01000601	869	187.54	15	agkistrodon contortrix clone e33difj02iww5x microsatellite sequence
EMILISO_00614	GEFK01000602	864	62.88	5	---NA---
EMILISO_00615	GEFK01000603	869	425.09	34	ssrb_canfa ame: full=translocon-associated protein subunit beta short=trap-beta ame: full=glycoprotein 25h short=gp25h ame: full=signal sequence receptor subunit beta short=ssr-beta flags: precursor
EMILISO_00616	GEFK01000604	869	200.04	16	at5f1_human ame: full=atp synthase subunit mitochondrial short=atpase subunit b flags: precursor
EMILISO_00617	GEFK01000605	868	137.69	11	cftr_ornan ame: full=cystic fibrosis transmembrane conductance regulator short=cftr ame: full=atp-binding cassette sub-family c member 7 ame: full=channel conductance-controlling atpase ame: full=camp-dependent chloride channel
EMILISO_00618	GEFK01000606	856	76.16	6	ero1a_bovin ame: full=ero1-like protein alpha short=ero1-l short=ero1-l-alpha ame: full=endoplasmic oxidoreductin-1-like protein ame: full=oxidoreductin-1-l-alpha flags: precursor
EMILISO_00619	GEFK01000607	861	126.19	10	gallus gallus muscleblind-like 3 transcript variant mrna
EMILISO_00620	GEFK01000608	860	50.53	4	mp2k4_mouse ame: full=dual specificity mitogen-activated protein kinase kinase 4 short=map kinase kinase 4 short=mapkk 4 ame: full=c-jun n-terminal kinase kinase 1 short=jnk kinase 1 short=jnkk 1 ame: full=jnk-activating kinase 1
EMILISO_00621	GEFK01000609	863	251.79	20	aa2da_danre ame: full=alpha-2da adrenergic receptor ame: full=alpha-2da adrenoceptor short=alpha ar ame: full=alpha-2da adrenoreceptor
EMILISO_00622	GEFK01000610	861	214.52	17	at2a3_chick ame: full=sarcoplasmic endoplasmic reticulum calcium atpase 3 short= 3 short=serca3 short=sr ca(2+)-atpase 3 ame: full=calcium pump 3
EMILISO_00623	GEFK01000611	861	1097.84	87	rl5_chick ame: full=60s ribosomal protein l5
EMILISO_00624	GEFK01000612	859	151.78	12	at11b_human ame: full=probable phospholipid-transporting atpase if ame: full=atpase ir ame: full=atpase class vi type 11b
EMILISO_00625	GEFK01000613	852	293.3	23	aipysurus laevis clone al093 microsatellite sequence
EMILISO_00626	GEFK01000614	856	279.24	22	cd82_rat ame: full=cd82 antigen ame: full=metastasis suppressor kangai-1 homolog ame: cd_antigen=cd82
EMILISO_00627	GEFK01000615	854	203.56	16	---NA---
EMILISO_00628	GEFK01000616	850	396.25	31	nucb2_human ame: full=nucleobindin-2 ame: full=dna-binding protein nefa ame: full=gastric cancer antigen zg4 flags: precursor
EMILISO_00629	GEFK01000617	849	89.58	7	gp3la_xenla ame: full=golgi phosphoprotein 3-like a
EMILISO_00630	GEFK01000618	852	395.32	31	psn2_xenla ame: full=presenilin-2 short=ps-2 ame: full=presenilin beta short=ps-beta
EMILISO_00631	GEFK01000619	843	103.11	8	---NA---
EMILISO_00632	GEFK01000620	837	129.81	10	cpns1_pig ame: full=calpain small subunit 1 short=css1 ame: full=calcium-activated neutral proteinase small subunit short=canp small subunit ame: full=calcium-dependent protease small subunit short=cdps
EMILISO_00633	GEFK01000621	843	154.66	12	trimeresurus flavoviridis phospholipase a2 gene cluster ( 1 3 5)
EMILISO_00634	GEFK01000622	845	424.31	33	hm13_mouse ame: full=minor histocompatibility antigen h13 ame: full=presenilin-like protein 3 ame: full=signal peptide peptidase
EMILISO_00635	GEFK01000623	845	102.86	8	rgs2_bovin ame: full=regulator of g-protein signaling 2 short=rgs2
EMILISO_00636	GEFK01000624	843	90.22	7	spf27_ponab ame: full=pre-mrna-splicing factor spf27 ame: full=breast carcinoma-amplified sequence 2 homolog
EMILISO_00637	GEFK01000625	843	2745.2	213	sistrurus catenatus edwardsi clone 1a 12s ribosomal rna-like partial sequence mitochondrial
EMILISO_00638	GEFK01000626	832	143.65	11	---NA---
EMILISO_00639	GEFK01000627	844	102.98	8	anolis carolinensis protein fam46a-like mrna
EMILISO_00640	GEFK01000628	842	245.17	19	cf062_ponab ame: full=uncharacterized protein c6orf62 homolog
EMILISO_00641	GEFK01000629	840	181.08	14	anolis carolinensis gtp-binding protein sar1a- transcript variant 2 mrna
EMILISO_00642	GEFK01000630	841	142.11	11	itfg3_rat ame: full=protein itfg3
EMILISO_00643	GEFK01000631	841	271.3	21	ehf_bovin ame: full=ets homologous factor ame: full=ets domain-containing transcription factor
EMILISO_00644	GEFK01000632	837	220.67	17	snp23_mouse ame: full=synaptosomal-associated protein 23 short=snap-23 ame: full=syndet ame: full=vesicle-membrane fusion protein snap-23
EMILISO_00645	GEFK01000633	827	52.55	4	trugtgtbpbtrimeresurus gramineus g gene for tata-box binding complete cds
EMILISO_00646	GEFK01000634	838	77.79	6	---NA---
EMILISO_00647	GEFK01000635	836	155.95	12	tcpe_human ame: full=t-complex protein 1 subunit epsilon short=tcp-1-epsilon ame: full=cct-epsilon
EMILISO_00648	GEFK01000636	831	1307.44	100	hba_dryce ame: full=hemoglobin subunit alpha-a ame: full=alpha-a-globin ame: full=hemoglobin alpha-a chain
EMILISO_00649	GEFK01000637	834	286.6	22	if5_rat ame: full=eukaryotic translation initiation factor 5 short=eif-5
EMILISO_00650	GEFK01000638	831	104.6	8	zn638_human ame: full=zinc finger protein 638 ame: full=cutaneous t-cell lymphoma-associated antigen se33-1 short=ctcl-associated antigen se33-1 ame: full=nuclear protein 220 ame: full=zinc finger matrin-like protein
EMILISO_00651	GEFK01000639	831	117.67	9	---NA---
EMILISO_00652	GEFK01000640	831	65.37	5	pp1gb_xenla ame: full=serine threonine-protein phosphatase pp1-gamma catalytic subunit b short=pp-1g-b ame: full=protein phosphatase 1 zeta short=xpp1-zeta
EMILISO_00653	GEFK01000641	829	235.91	18	esyt1_ponab ame: full=extended synaptotagmin-1 short=e-syt1
EMILISO_00654	GEFK01000642	824	65.93	5	asml_human ame: full=n-acetylserotonin o-methyltransferase-like protein short=asmtl
EMILISO_00655	GEFK01000643	825	184.37	14	arp3_chick ame: full=actin-related protein 3 ame: full=actin-like protein 3
EMILISO_00656	GEFK01000644	827	643.74	49	crp_mouse ame: full=c-reactive protein flags: precursor
EMILISO_00658	GEFK01000646	824	237.34	18	arfg3_human ame: full=adp-ribosylation factor gtpase-activating protein 3 short=arf gap 3
EMILISO_00659	GEFK01000647	823	132.01	10	---NA---
EMILISO_00660	GEFK01000648	817	585.13	44	vmsa_trist ame: full=zinc metalloproteinase-disintegrin stejnihagin-a flags: precursor
EMILISO_00661	GEFK01000649	821	52.93	4	mpri_human ame: full=cation-independent mannose-6-phosphate receptor short=ci man-6-p receptor short=ci-mpr short=m6pr ame: full=300 kda mannose 6-phosphate receptor short=mpr 300
EMILISO_00662	GEFK01000650	818	225.8	17	ophiophagus hannah l-amino acid oxidase complete cds
EMILISO_00663	GEFK01000651	821	79.4	6	copg2_human ame: full=coatomer subunit gamma-2 ame: full=gamma-2-coat protein short=gamma-2-cop
EMILISO_00664	GEFK01000652	819	185.72	14	---NA---
EMILISO_00665	GEFK01000653	814	106.78	8	s38aa_human ame: full= sodium-coupled neutral amino acid transporter 10
EMILISO_00666	GEFK01000654	818	1487.6	112	neurofilament triplet h1 protein
EMILISO_00667	GEFK01000655	814	293.64	22	ampe_human ame: full=glutamyl aminopeptidase short=eap ame: full=aminopeptidase a short=ap-a ame: full=differentiation antigen gp160 ame: cd_antigen=cd249
EMILISO_00668	GEFK01000656	814	160.17	12	agkistrodon contortrix clone e33difj02fgtvz microsatellite sequence
EMILISO_00669	GEFK01000657	815	53.32	4	gallus gallus finished clone 730o15
EMILISO_00670	GEFK01000658	815	253.29	19	bothrops jararaca toxin 2 partial cds
EMILISO_00671	GEFK01000659	812	200.7	15	csde1_human ame: full=cold shock domain-containing protein e1 ame: full=n-ras upstream gene protein ame: full=protein unr
EMILISO_00672	GEFK01000660	810	147.55	11	dictyostelium discoideum ax4 ring zinc finger-containing protein complete cds
EMILISO_00673	GEFK01000661	812	53.52	4	pan troglodytes myosin x mrna
EMILISO_00674	GEFK01000662	810	107.31	8	pigr_human ame: full=polymeric immunoglobulin receptor short=p short=poly-ig receptor ame: full=hepatocellular carcinoma-associated protein tb6 contains: ame: full=secretory component flags: precursor
EMILISO_00675	GEFK01000663	810	80.48	6	agkistrodon contortrix clone e33difj02gwrzb microsatellite sequence
EMILISO_00676	GEFK01000664	804	1175.67	87	atp6_dinse ame: full=atp synthase subunit a ame: full=f-atpase protein 6
EMILISO_00677	GEFK01000665	807	484.68	36	rl6_pig ame: full=60s ribosomal protein l6
EMILISO_00678	GEFK01000666	792	96.03	7	mspd1_mouse ame: full=motile sperm domain-containing protein 1
EMILISO_00679	GEFK01000667	797	122.69	9	fkb10_bovin ame: full=peptidyl-prolyl cis-trans isomerase fkbp10 short=ppiase fkbp10 ame: full=fk506-binding protein 10 short=fkbp-10 ame: full=rotamase flags: precursor
EMILISO_00680	GEFK01000668	802	94.83	7	las1l_human ame: full=protein las1 homolog
EMILISO_00681	GEFK01000669	799	163.18	12	philodryas olfersii c-type natriuretic peptide complete cds
EMILISO_00682	GEFK01000670	804	108.11	8	homo sapiens bicaudal d homolog 2 transcript variant mrna
EMILISO_00683	GEFK01000671	798	272.3	20	npm_chick ame: full=nucleophosmin short=npm ame: full=nucleolar phosphoprotein b23 ame: full=nucleolar protein no38 ame: full=numatrin
EMILISO_00684	GEFK01000672	801	189.9	14	---NA---
EMILISO_00685	GEFK01000673	799	217.57	16	agkistrodon contortrix clone e33difj02hwix6 microsatellite sequence
EMILISO_00686	GEFK01000674	797	231.75	17	---NA---
EMILISO_00687	GEFK01000675	798	136.15	10	---NA---
EMILISO_00688	GEFK01000676	795	95.67	7	pol2_mouse ame: full=retrovirus-related pol polyprotein line-1 ame: full=long interspersed element-1 short=l1 includes: ame: full=reverse transcriptase includes: ame: full=endonuclease
EMILISO_00689	GEFK01000677	795	123	9	scpdh_bovin ame: full=probable saccharopine dehydrogenase
EMILISO_00690	GEFK01000678	782	166.72	12	k2c4_human ame: full= type ii cytoskeletal 4 ame: full=cytokeratin-4 short=ck-4 ame: full=keratin-4 short=k4 ame: full=type-ii keratin kb4
EMILISO_00691	GEFK01000679	793	232.92	17	ring2_mouse ame: full=e3 ubiquitin-protein ligase ring2 ame: full=ring finger protein 1b short=ring1b ame: full=ring finger protein 2
EMILISO_00692	GEFK01000680	793	369.92	27	pdia6_mesau ame: full=protein disulfide-isomerase a6 ame: full=protein disulfide isomerase p5 flags: precursor
EMILISO_00693	GEFK01000681	795	546.66	40	rl8_rat ame: full=60s ribosomal protein l8
EMILISO_00694	GEFK01000682	793	232.92	17	myl9_bovin ame: full=myosin regulatory light polypeptide 9 ame: full=myosin regulatory light chain smooth muscle isoform ame: full=myosin regulatory light chain 9
EMILISO_00695	GEFK01000683	789	151.47	11	---NA---
EMILISO_00696	GEFK01000684	784	110.87	8	yipf6_danre ame: full=protein yipf6 ame: full=yip1 family member 6
EMILISO_00697	GEFK01000685	788	1351.21	98	rs3_rat ame: full=40s ribosomal protein s3
EMILISO_00698	GEFK01000686	786	677.32	49	rhabdophis tigrinus mitochondrial uncoupling protein a complete cds nuclear gene for mitochondrial product
EMILISO_00699	GEFK01000687	786	82.94	6	---NA---
EMILISO_00700	GEFK01000688	780	69.65	5	---NA---
EMILISO_00701	GEFK01000689	784	235.59	17	mk06_chick ame: full=mitogen-activated protein kinase 6 short=map kinase 6 short=mapk 6
EMILISO_00702	GEFK01000690	784	263.31	19	wasl_mouse ame: full=neural wiskott-aldrich syndrome protein short=n-wasp
EMILISO_00703	GEFK01000691	780	278.59	20	ef1b_human ame: full=elongation factor 1-beta short=ef-1-beta
EMILISO_00704	GEFK01000692	776	98.01	7	eif3d_bovin ame: full=eukaryotic translation initiation factor 3 subunit d short=eif3d ame: full=eukaryotic translation initiation factor 3 subunit 7 ame: full=eif-3-zeta
EMILISO_00705	GEFK01000693	780	208.94	15	rn128_human ame: full=e3 ubiquitin-protein ligase rnf128 ame: full=gene related to anergy in lymphocytes protein ame: full=ring finger protein 128 flags: precursor
EMILISO_00706	GEFK01000694	777	111.86	8	cs022_bovin ame: full=r3h domain-containing protein c19orf22 homolog
EMILISO_00707	GEFK01000695	771	112.73	8	---NA---
EMILISO_00708	GEFK01000696	776	182.01	13	osbl5_human ame: full=oxysterol-binding protein 5 short=orp-5 short=osbp-related protein 5 ame: full=oxysterol-binding protein homolog 1
EMILISO_00709	GEFK01000697	772	379.99	27	tba_notvi ame: full=tubulin alpha chain
EMILISO_00710	GEFK01000698	771	126.83	9	csrp1_ponab ame: full=cysteine and glycine-rich protein 1 ame: full=cysteine-rich protein 1 short=crp1
EMILISO_00711	GEFK01000699	769	127.16	9	---NA---
EMILISO_00712	GEFK01000700	772	168.88	12	ktn1_chick ame: full=kinectin
EMILISO_00713	GEFK01000701	771	169.1	12	---NA---
EMILISO_00714	GEFK01000702	771	70.46	5	---NA---
EMILISO_00715	GEFK01000703	771	98.64	7	dx39b_bovin ame: full=spliceosome rna helicase ddx39b ame: full=56 kda u2af65-associated protein ame: full=dead box protein uap56
EMILISO_00716	GEFK01000704	768	183.91	13	bungarus multicinctus gene encoding kappa3-bungarotoxin
EMILISO_00717	GEFK01000705	764	355.52	25	ssrg_mouse ame: full=translocon-associated protein subunit gamma short=trap-gamma ame: full=signal sequence receptor subunit gamma short=ssr-gamma
EMILISO_00718	GEFK01000706	765	113.62	8	reverse transcriptase-like protein
EMILISO_00719	GEFK01000707	767	3073.88	217	cox3_dinse ame: full=cytochrome c oxidase subunit 3 ame: full=cytochrome c oxidase polypeptide iii
EMILISO_00720	GEFK01000708	764	255.98	18	mdhm_mouse ame: full=malate mitochondrial flags: precursor
EMILISO_00721	GEFK01000709	766	127.65	9	f120c_human ame: full=constitutive coactivator of ppar-gamma-like protein 2 ame: full=protein fam120c ame: full=tumor antigen bj-hcc-21
EMILISO_00722	GEFK01000710	762	85.55	6	---NA---
EMILISO_00723	GEFK01000711	766	510.62	36	---NA---
EMILISO_00724	GEFK01000712	765	127.82	9	kapca_pig ame: full=camp-dependent protein kinase catalytic subunit alpha short=pka c-alpha
EMILISO_00725	GEFK01000713	762	755.69	53	---NA---
EMILISO_00726	GEFK01000714	754	57.64	4	---NA---
EMILISO_00727	GEFK01000715	753	331.86	23	---NA---
EMILISO_00728	GEFK01000716	761	99.94	7	---NA---
EMILISO_00729	GEFK01000717	762	627.37	44	rssa_rat ame: full=40s ribosomal protein sa ame: full=37 kda laminin receptor precursor short=37lrp ame: full=37 67 kda laminin receptor short=lrp lr ame: full=67 kda laminin receptor short=67lr
EMILISO_00730	GEFK01000718	760	872.05	61	pdpfa_xenla ame: full=pancreatic progenitor cell differentiation and proliferation factor a ame: full=exocrine differentiation and proliferation factor a
EMILISO_00731	GEFK01000719	756	344.92	24	msln_human ame: full=mesothelin ame: full=cak1 antigen ame: full=pre-pro-megakaryocyte-potentiating factor contains: ame: full=megakaryocyte-potentiating factor short=mpf contains: ame: full= cleaved form flags: precursor
EMILISO_00732	GEFK01000720	758	215	15	s15a2_rabit ame: full=solute carrier family 15 member 2 ame: full=kidney h(+) peptide cotransporter ame: full=oligopeptide kidney isoform ame: full=peptide transporter 2
EMILISO_00733	GEFK01000721	752	390.09	27	bothrops jararaca bradykinin-potentiating c-type natriuretic peptide-related pseudogene complete sequence
EMILISO_00734	GEFK01000722	756	301.8	21	efc4b_human ame: full=ef-hand calcium-binding domain-containing protein 4b ame: full=calcium release-activated calcium channel regulator 2a short=crac channel regulator 2a
EMILISO_00735	GEFK01000723	753	202	14	if4a1_rabit ame: full=eukaryotic initiation factor 4a-i short=eif-4a-i short=eif4a-i ame: full=atp-dependent rna helicase eif4a-1
EMILISO_00736	GEFK01000724	756	86.23	6	glcm_mouse ame: full=glucosylceramidase ame: full=acid beta-glucosidase ame: full=beta-glucocerebrosidase ame: full=d-glucosyl-n-acylsphingosine glucohydrolase flags: precursor
EMILISO_00737	GEFK01000725	733	118.58	8	---NA---
EMILISO_00738	GEFK01000726	748	392.18	27	hs90a_horse ame: full=heat shock protein hsp 90-alpha
EMILISO_00739	GEFK01000727	748	232.4	16	flna_mouse ame: full=filamin-a short=fln-a ame: full=actin-binding protein 280 short=abp-280 ame: full=alpha-filamin ame: full=endothelial actin-binding protein ame: full=filamin-1 ame: full=non-muscle filamin
EMILISO_00740	GEFK01000728	752	115.58	8	---NA---
EMILISO_00741	GEFK01000729	750	188.32	13	arhgg_human ame: full=rho guanine nucleotide exchange factor 16 ame: full=ephexin-4
EMILISO_00742	GEFK01000730	746	349.54	24	copb2_bovin ame: full=coatomer subunit beta ame: full=beta -coat protein short=beta -cop ame: full=p102
EMILISO_00743	GEFK01000731	739	117.62	8	---NA---
EMILISO_00744	GEFK01000732	744	116.83	8	---NA---
EMILISO_00745	GEFK01000733	742	58.57	4	rere_rat ame: full=arginine-glutamic acid dipeptide repeats protein ame: full=atrophin-1-related protein
EMILISO_00746	GEFK01000734	746	247.59	17	catb_chick ame: full=cathepsin b ame: full=cathepsin b1 contains: ame: full=cathepsin b light chain contains: ame: full=cathepsin b heavy chain flags: precursor
EMILISO_00747	GEFK01000735	743	58.49	4	ca174_human ame: full=upf0688 protein c1orf174
EMILISO_00748	GEFK01000736	744	262.86	18	canis familiaris splicing arginine serine-rich 5 (pre-mrna splicing factor srp40) (insulin-induced growth response protein cl-4) (delayed-early protein hrs) transcript variant 20 mrna
EMILISO_00749	GEFK01000737	744	219.05	15	gpx1_human ame: full=glutathione peroxidase 1 short=gpx-1 short=gshpx-1 ame: full=cellular glutathione peroxidase
EMILISO_00750	GEFK01000738	744	175.24	12	---NA---
EMILISO_00751	GEFK01000739	738	117.78	8	bha15_human ame: full=class a basic helix-loop-helix protein 15 short=bhlha15 ame: full=class b basic helix-loop-helix protein 8 short=bhlhb8 ame: full= intestine and stomach expression 1 short=mist-1
EMILISO_00752	GEFK01000740	744	321.27	22	soat1_human ame: full=sterol o-acyltransferase 1 ame: full=acyl-coenzyme a:cholesterol acyltransferase 1 short=acat-1 ame: full=cholesterol acyltransferase 1
EMILISO_00753	GEFK01000741	743	307.08	21	capzb_rat ame: full=f-actin-capping protein subunit beta ame: full= beta
EMILISO_00754	GEFK01000742	742	175.71	12	fxi1e_xenla ame: full=forkhead box protein i1-ema short= 1-ema ame: full=ectodermally-expressed mesendoderm antagonist short=xema ame: full= 3
EMILISO_00755	GEFK01000743	739	73.51	5	sesq2_bovin ame: full=sesquipedalian-2 short=ses2 ame: full=27 kda inositol polyphosphate phosphatase interacting protein b short=ipip27b
EMILISO_00756	GEFK01000744	732	74.21	5	---NA---
EMILISO_00757	GEFK01000745	739	191.13	13	dpp4_felca ame: full=dipeptidyl peptidase 4 ame: full=dipeptidyl peptidase iv short=dpp iv ame: full=t-cell activation antigen cd26 ame: cd_antigen=cd26 contains: ame: full=dipeptidyl peptidase 4 membrane form
EMILISO_00758	GEFK01000746	736	221.43	15	---NA---
EMILISO_00759	GEFK01000747	737	353.81	24	k2c6b_human ame: full= type ii cytoskeletal 6b ame: full=cytokeratin-6b short=ck-6b ame: full=keratin-6b short=k6b ame: full=type-ii keratin kb10
EMILISO_00760	GEFK01000748	737	368.55	25	canis familiaris adp-ribosylation factor 1 mrna
EMILISO_00761	GEFK01000749	732	178.11	12	pantherophis guttatus hoxc13 complete cds and hoxc12 partial cds
EMILISO_00762	GEFK01000750	735	147.82	10	nb5r3_canfa ame: full=nadh-cytochrome b5 reductase 3 short=b5r short=cytochrome b5 reductase ame: full=diaphorase-1 contains: ame: full=nadh-cytochrome b5 reductase 3 membrane-bound form contains: ame: full=nadh-cytochrome b5 reductase 3 soluble form
EMILISO_00763	GEFK01000751	727	194.28	13	spx3_chick ame: full=sugar phosphate exchanger 3 ame: full=solute carrier family 37 member 3
EMILISO_00764	GEFK01000752	735	679.98	46	rl7a_chick ame: full=60s ribosomal protein l7a
EMILISO_00765	GEFK01000753	730	357.2	24	agkistrodon contortrix clone e33difj02hyrxj microsatellite sequence
EMILISO_00766	GEFK01000754	730	253.02	17	erd22_chick ame: full=er lumen protein retaining receptor 2 ame: full=kdel endoplasmic reticulum protein retention receptor 2 short=kdel receptor 2
EMILISO_00767	GEFK01000755	732	222.64	15	agkistrodon contortrix clone e33difj02f0sb0 microsatellite sequence
EMILISO_00768	GEFK01000756	731	193.22	13	se1l1_human ame: full=protein sel-1 homolog 1 ame: full=suppressor of lin-12-like protein 1 short=sel-1l flags: precursor
EMILISO_00769	GEFK01000757	730	223.25	15	idd_human ame: full=integral membrane protein dgcr2 idd flags: precursor
EMILISO_00770	GEFK01000758	730	133.95	9	an32a_bovin ame: full=acidic leucine-rich nuclear phosphoprotein 32 family member a ame: full=leucine-rich acidic nuclear protein short=lanp ame: full=potent heat-stable protein phosphatase 2a inhibitor i1pp2a
EMILISO_00771	GEFK01000759	730	297.67	20	pan troglodytes protocadherin beta 16 mrna
EMILISO_00772	GEFK01000760	729	104.33	7	thoc5_human ame: full=tho complex subunit 5 homolog ame: full=functional spliceosome-associated protein 79 short=fsap79 ame: full=nf2 meningioma region protein ame: full=placental protein short= ame: full=htrex90
EMILISO_00773	GEFK01000761	728	134.32	9	hnrpc_ponab ame: full=heterogeneous nuclear ribonucleoprotein c short=hnrnp c
EMILISO_00774	GEFK01000762	727	59.78	4	agkistrodon contortrix clone e33difj02gdnu7 microsatellite sequence
EMILISO_00775	GEFK01000763	727	209.23	14	eif3k_xentr ame: full=eukaryotic translation initiation factor 3 subunit k short=eif3k ame: full=eukaryotic translation initiation factor 3 subunit 12 ame: full=eif-3 p25
EMILISO_00776	GEFK01000764	726	44.9	3	---NA---
EMILISO_00777	GEFK01000765	725	374.65	25	---NA---
EMILISO_00778	GEFK01000766	724	135.06	9	---NA---
EMILISO_00779	GEFK01000767	713	472.38	31	gbrap_rat ame: full=gamma-aminobutyric acid receptor-associated protein ame: full=gaba receptor-associated protein
EMILISO_00780	GEFK01000768	720	181.08	12	homo sapiens cold shock domain containing rna-binding transcript variant mrna
EMILISO_00781	GEFK01000769	722	180.58	12	anolis carolinensis vigilin-like mrna
EMILISO_00782	GEFK01000770	721	286.31	19	ldhb_sceun ame: full=l-lactate dehydrogenase b chain short=ldh-b
EMILISO_00783	GEFK01000771	721	241.11	16	lap4a_chick ame: full=lysosomal-associated transmembrane protein 4a
EMILISO_00784	GEFK01000772	718	90.79	6	gmcl1_mouse ame: full=germ cell-less 1 short=mgcl-1 ame: full=dp-interacting protein short=dip
EMILISO_00785	GEFK01000773	721	75.35	5	lpar1_bovin ame: full=lysophosphatidic acid receptor 1 short=lpa receptor 1 short=lpa-1 ame: full=lysophosphatidic acid receptor edg-2 ame: full=
EMILISO_00786	GEFK01000774	716	531.1	35	plbl1_human ame: full=phospholipase b-like 1 ame: full=lama-like protein 1 ame: full=lamina ancestor homolog 1 ame: full=phospholipase b domain-containing protein 1 flags: precursor
EMILISO_00787	GEFK01000775	712	167.86	11	stim2_human ame: full=stromal interaction molecule 2 flags: precursor
EMILISO_00788	GEFK01000776	714	167.39	11	tr150_xenla ame: full=thyroid hormone receptor-associated protein 3 ame: full=thyroid hormone receptor-associated protein complex 150 kda component short=trap150
EMILISO_00789	GEFK01000777	713	76.19	5	cobl1_mouse ame: full=cordon-bleu 1 ame: full=cobl-related protein 1
EMILISO_00790	GEFK01000778	709	275.83	18	trimeresurus flavoviridis vascular endothelial growth factor a190 isoform complete cds
EMILISO_00791	GEFK01000779	713	944.77	62	rl7_chick ame: full=60s ribosomal protein l7
EMILISO_00792	GEFK01000780	705	92.47	6	---NA---
EMILISO_00793	GEFK01000781	712	122.08	8	---NA---
EMILISO_00794	GEFK01000782	711	61.12	4	kpb2_human ame: full=phosphorylase b kinase regulatory subunit liver isoform short=phosphorylase kinase alpha l subunit
EMILISO_00795	GEFK01000783	710	61.21	4	smrc1_human ame: full=swi snf complex subunit smarcc1 ame: full=brg1-associated factor 155 short=baf155 ame: full=swi snf complex 155 kda subunit ame: full=swi snf-related matrix-associated actin-dependent regulator of chromatin subfamily c member 1
EMILISO_00796	GEFK01000784	707	138.31	9	adt2_rat ame: full=adp atp translocase 2 ame: full= carrier protein 2 ame: full=adenine nucleotide translocator 2 short=ant 2 ame: full=solute carrier family 25 member 5
EMILISO_00797	GEFK01000785	705	123.29	8	wnk3_human ame: full=serine threonine-protein kinase wnk3 ame: full=protein kinase lysine-deficient 3 ame: full=protein kinase with no lysine 3
EMILISO_00798	GEFK01000786	707	76.84	5	zn423_human ame: full=zinc finger protein 423 ame: full=olf1 ebf-associated zinc finger protein short=hoaz ame: full=smad- and olf-interacting zinc finger protein
EMILISO_00799	GEFK01000787	706	123.11	8	iqga1_human ame: full=ras gtpase-activating-like protein iqgap1 ame: full=p195
EMILISO_00800	GEFK01000788	706	138.5	9	adda_rat ame: full=alpha-adducin ame: full=erythrocyte adducin subunit alpha
EMILISO_00801	GEFK01000789	705	986.31	64	phla2_human ame: full=pleckstrin homology-like domain family a member 2 ame: full=beckwith-wiedemann syndrome chromosomal region 1 candidate gene c protein ame: full=imprinted in placenta and liver protein
EMILISO_00802	GEFK01000790	706	569.4	37	---NA---
EMILISO_00803	GEFK01000791	704	108.03	7	kpyk_chick ame: full=pyruvate kinase muscle isozyme
EMILISO_00804	GEFK01000792	704	308.66	20	anxa5_chick ame: full=annexin a5 ame: full=anchorin cii ame: full=annexin v ame: full=annexin-5 ame: full=calphobindin i short=cbp-i ame: full=endonexin ii ame: full=lipocortin v ame: full=placental anticoagulant protein i short=pap-i
EMILISO_00805	GEFK01000793	704	169.76	11	cdc5l_human ame: full=cell division cycle 5-like protein short=cdc5-like protein ame: full=pombe cdc5-related protein
EMILISO_00806	GEFK01000794	701	108.49	7	pan troglodytes far upstream element binding protein 1 mrna
EMILISO_00807	GEFK01000795	704	5123.75	332	phospholipase a2 inhibitor subunit gamma b-like
EMILISO_00808	GEFK01000796	704	555.59	36	fri1_ranca ame: full= higher subunit short=ferritin h
EMILISO_00809	GEFK01000797	699	186.52	12	psmd4_human ame: full=26s proteasome non-atpase regulatory subunit 4 ame: full=26s proteasome regulatory subunit rpn10 ame: full=26s proteasome regulatory subunit s5a ame: full=antisecretory factor 1 short=af short=asf ame: full=multiubiquitin chain-binding protein
EMILISO_00810	GEFK01000798	702	263.11	17	aqp3_bovin ame: full=aquaporin-3 short=aqp-3 ame: full=aquaglyceroporin-3
EMILISO_00811	GEFK01000799	698	124.53	8	homo sapiens chromosome clone rp11- complete sequence
EMILISO_00812	GEFK01000800	700	310.42	20	taeniopygia guttata misc_rna miscrna
EMILISO_00813	GEFK01000801	699	186.52	12	mus musculus microtubule associated serine threonine kinase mrna (cdna clone image:4527728) with apparent retained intron
EMILISO_00814	GEFK01000802	700	279.38	18	muc5a_human ame: full=mucin-5ac short=muc-5ac ame: full=gastric mucin ame: full=lewis b blood group antigen short= ame: full=major airway glycoprotein ame: full=mucin-5 subtype tracheobronchial ame: full=tracheobronchial mucin short=tbm flags: precursor
EMILISO_00815	GEFK01000803	698	140.09	9	glyr1_chick ame: full= oxidoreductase glyr1 ame: full=glyoxylate reductase 1 homolog ame: full=nuclear protein np60
EMILISO_00816	GEFK01000804	699	388.58	25	counting factor associated protein d-like
EMILISO_00817	GEFK01000805	698	186.79	12	sap_chick ame: full=proactivator polypeptide contains: ame: full=saposin-a contains: ame: full=saposin-b contains: ame: full=saposin-c contains: ame: full=saposin-d flags: precursor
EMILISO_00818	GEFK01000806	698	295.75	19	rpgp1_human ame: full=rap1 gtpase-activating protein 1 short=rap1gap short=rap1gap1
EMILISO_00819	GEFK01000807	698	124.53	8	ophiophagus hannah ohanin complete cds
EMILISO_00820	GEFK01000808	697	93.53	6	wdr41_human ame: full=wd repeat-containing protein 41
EMILISO_00821	GEFK01000809	696	327.82	21	flna_human ame: full=filamin-a short=fln-a ame: full=actin-binding protein 280 short=abp-280 ame: full=alpha-filamin ame: full=endothelial actin-binding protein ame: full=filamin-1 ame: full=non-muscle filamin
EMILISO_00822	GEFK01000810	693	125.42	8	---NA---
EMILISO_00823	GEFK01000811	696	78.05	5	nin_human ame: full=ninein short=hninein ame: full=glycogen synthase kinase 3 beta-interacting protein short=gsk3b-interacting protein
EMILISO_00824	GEFK01000812	694	532.28	34	hsp7c_crigr ame: full=heat shock cognate 71 kda protein ame: full=heat shock 70 kda protein 8
EMILISO_00825	GEFK01000813	696	187.32	12	txnip_pig ame: full=thioredoxin-interacting protein
EMILISO_00826	GEFK01000814	694	156.55	10	---NA---
EMILISO_00827	GEFK01000815	693	94.07	6	agkistrodon contortrix clone e33difj02h5ygc microsatellite sequence
EMILISO_00828	GEFK01000816	688	94.75	6	---NA---
EMILISO_00829	GEFK01000817	691	62.89	4	vat1_mouse ame: full=synaptic vesicle membrane protein vat-1 homolog
EMILISO_00830	GEFK01000818	687	189.78	12	rattus norvegicus gene model 996 mrna
EMILISO_00831	GEFK01000819	691	267.3	17	gels_chick ame: full=gelsolin ame: full=actin-depolymerizing factor short=adf ame: full=brevin ame: full=homogenin flags: precursor
EMILISO_00832	GEFK01000820	691	628.93	40	samp_cavpo ame: full=serum amyloid p-component short=sap flags: precursor
EMILISO_00833	GEFK01000821	678	96.15	6	t184c_chick ame: full=transmembrane protein 184c ame: full=transmembrane protein 34
EMILISO_00834	GEFK01000822	690	204.7	13	vatd_mouse ame: full=v-type proton atpase subunit d short=v-atpase subunit d ame: full=v-atpase 28 kda accessory protein ame: full=vacuolar proton pump subunit d
EMILISO_00835	GEFK01000823	687	237.22	15	---NA---
EMILISO_00836	GEFK01000824	687	158.15	10	agkistrodon contortrix clone e33difj02imaar microsatellite sequence
EMILISO_00837	GEFK01000825	688	142.13	9	PREDICTED: hypothetical protein LOC100406107 [Callithrix jacchus]
EMILISO_00838	GEFK01000826	683	143.17	9	elaphe obsoleta microsatellite eobms373 sequence
EMILISO_00839	GEFK01000827	687	506.08	32	anxa2_chick ame: full=annexin a2 ame: full=annexin ii ame: full=annexin-2 ame: full=calpactin i heavy chain ame: full=calpactin-1 heavy chain ame: full=chromobindin-8 ame: full=lipocortin ii ame: full=placental anticoagulant protein iv short=pap-iv ame: full=protein i ame: full=p36
EMILISO_00840	GEFK01000828	686	126.7	8	zn462_human ame: full=zinc finger protein 462
EMILISO_00841	GEFK01000829	686	110.87	7	aldh2_bovin ame: full=aldehyde mitochondrial ame: full=aldh class 2 ame: full=aldh-e2 ame: full=aldhi flags: precursor
EMILISO_00842	GEFK01000830	681	63.82	4	endonuclease-reverse transcriptase
EMILISO_00843	GEFK01000831	681	127.63	8	pdia5_human ame: full=protein disulfide-isomerase a5 ame: full=protein disulfide isomerase-related protein flags: precursor
EMILISO_00844	GEFK01000832	683	111.35	7	arp2_rat ame: full=actin-related protein 2 ame: full=actin-like protein 2
EMILISO_00845	GEFK01000833	681	6413.6	402	exfab_chick ame: full=extracellular fatty acid-binding protein short=ex-fabp ame: full=protein ch21 ame: full=quiescence-specific protein ame: full=p20k flags: precursor
EMILISO_00846	GEFK01000834	681	95.73	6	sc6a6_canfa ame: full=sodium- and chloride-dependent taurine transporter ame: full=solute carrier family 6 member 6
EMILISO_00847	GEFK01000835	681	127.63	8	fgop2_ponab ame: full=fgfr1 oncogene partner 2 homolog
EMILISO_00848	GEFK01000836	680	207.71	13	nucl_chick ame: full=nucleolin ame: full=protein c23
EMILISO_00849	GEFK01000837	680	79.89	5	---NA---
EMILISO_00850	GEFK01000838	681	335.04	21	arf1_rat ame: full=adp-ribosylation factor 1
EMILISO_00851	GEFK01000839	675	177.06	11	fkbp4_human ame: full=peptidyl-prolyl cis-trans isomerase fkbp4 short=ppiase fkbp4 ame: full=51 kda fk506-binding protein short=fkbp51 ame: full=52 kda fk506-binding protein
EMILISO_00852	GEFK01000840	676	112.51	7	yipf1_ponab ame: full=protein yipf1 ame: full=yip1 family member 1
EMILISO_00853	GEFK01000841	677	256.78	16	syg_rat ame: full=glycyl-trna synthetase ame: full=diadenosine tetraphosphate synthetase short=ap-4-a synthetase ame: full=glycine--trna ligase short=
EMILISO_00854	GEFK01000842	677	224.68	14	lman1_human ame: full=protein ergic-53 ame: full=er-golgi intermediate compartment 53 kda protein ame: full=gp58 ame: full=intracellular mannose-specific lectin mr60 ame: full=lectin mannose-binding 1 flags: precursor
EMILISO_00855	GEFK01000843	676	80.36	5	lmna_pig ame: full=prelamin-a c contains: ame: full=lamin-a c flags: precursor
EMILISO_00856	GEFK01000844	675	144.86	9	if4g1_human ame: full=eukaryotic translation initiation factor 4 gamma 1 short=eif-4-gamma 1 short=eif-4g 1 short=eif-4g1 ame: full=p220
EMILISO_00857	GEFK01000845	675	96.58	6	macf1_human ame: full=microtubule-actin cross-linking factor isoforms 1 2 3 5 ame: full=620 kda actin-binding protein short=abp620 ame: full=actin cross-linking family protein 7 ame: full=macrophin-1 ame: full=trabeculin-alpha
EMILISO_00858	GEFK01000846	673	1210.79	75	rs6_rat ame: full=40s ribosomal protein s6
EMILISO_00859	GEFK01000847	670	97.3	6	pth2_caeel ame: full=probable peptidyl-trna hydrolase 2 short=pth 2
EMILISO_00860	GEFK01000848	672	145.51	9	ryk_human ame: full=tyrosine-protein kinase ryk flags: precursor
EMILISO_00861	GEFK01000849	672	80.84	5	dock7_human ame: full=dedicator of cytokinesis protein 7
EMILISO_00862	GEFK01000850	671	113.34	7	psa5_mouse ame: full=proteasome subunit alpha type-5 ame: full=macropain zeta chain ame: full=multicatalytic endopeptidase complex zeta chain ame: full=proteasome zeta chain
EMILISO_00863	GEFK01000851	671	242.88	15	sfpq_human ame: full=splicing proline- and glutamine-rich ame: full=100 kda dna-pairing protein short=hpomp100 ame: full=dna-binding p52 p100 100 kda subunit
EMILISO_00864	GEFK01000852	671	113.34	7	ide_rat ame: full=insulin-degrading enzyme ame: full=insulin protease short=insulinase ame: full=insulysin
EMILISO_00865	GEFK01000853	668	146.38	9	---NA---
EMILISO_00866	GEFK01000854	669	925.7	57	rl13a_human ame: full=60s ribosomal protein l13a ame: full=23 kda highly basic protein
EMILISO_00867	GEFK01000855	668	113.85	7	asns_chick ame: full=asparagine synthetase ame: full=glutamine-dependent asparagine synthetase
EMILISO_00868	GEFK01000856	670	97.3	6	neul4_human ame: full=neuralized-like protein 4
EMILISO_00869	GEFK01000857	662	65.65	4	sf3b3_human ame: full=splicing factor 3b subunit 3 ame: full=pre-mrna-splicing factor sf3b 130 kda subunit short=sf3b130 ame: full=staf130 ame: full=spliceosome-associated protein 130 short=sap 130
EMILISO_00870	GEFK01000858	662	65.65	4	tex10_chick ame: full=testis-expressed sequence 10 protein homolog
EMILISO_00871	GEFK01000859	662	131.3	8	sjchgc04878 protein
EMILISO_00872	GEFK01000860	666	995.13	61	ptgds_ursar ame: full=prostaglandin-h2 d-isomerase ame: full=glutathione-independent pgd synthase ame: full=lipocalin-type prostaglandin-d synthase ame: full=prostaglandin-d2 synthase short=pgd2 synthase short=pgds short=pgds2 flags: precursor
EMILISO_00873	GEFK01000861	666	130.51	8	adcy8_rat ame: full=adenylate cyclase type 8 ame: full=atp pyrophosphate-lyase 8 ame: full=adenylate cyclase type viii ame: full=adenylyl cyclase 8 ame: full=ca(2+) calmodulin-activated adenylyl cyclase
EMILISO_00874	GEFK01000862	662	377.48	23	chch2_human ame: full=coiled-coil-helix-coiled-coil-helix domain-containing protein mitochondrial ame: full=aging-associated gene 10 protein ame: full=hcv ns2 trans-regulated protein short=ns2tp flags: precursor
EMILISO_00875	GEFK01000863	665	1258.03	77	lec1_lapha ame: full=c-type lectin-like 1 flags: precursor
EMILISO_00876	GEFK01000864	664	359.98	22	psn2_chick ame: full=presenilin-2 short=ps-2 contains: ame: full=presenilin-2 ntf subunit contains: ame: full=presenilin-2 ctf subunit
EMILISO_00877	GEFK01000865	662	82.06	5	ctbp1_xenla ame: full=c-terminal-binding protein 1 short= 1 ame: full=c-terminal-binding protein a
EMILISO_00878	GEFK01000866	664	179.99	11	---NA---
EMILISO_00879	GEFK01000867	665	522.82	32	ppia_human ame: full=peptidyl-prolyl cis-trans isomerase a short=ppiase a ame: full=cyclophilin a ame: full=cyclosporin a-binding protein ame: full=rotamase a
EMILISO_00880	GEFK01000868	664	163.63	10	erd23_mouse ame: full=er lumen protein retaining receptor 3 ame: full=kdel endoplasmic reticulum protein retention receptor 3 short=kdel receptor 3
EMILISO_00881	GEFK01000869	657	132.3	8	agkistrodon contortrix clone e33difj02jnc9c microsatellite sequence
EMILISO_00882	GEFK01000870	662	98.47	6	tcpd_human ame: full=t-complex protein 1 subunit delta short=tcp-1-delta ame: full=cct-delta ame: full=stimulator of tar rna-binding
EMILISO_00883	GEFK01000871	662	98.47	6	ctcf_human ame: full=transcriptional repressor ctcf ame: full=11-zinc finger protein ame: full=ccctc-binding factor ame: full=ctcfl paralog
EMILISO_00884	GEFK01000872	662	131.3	8	sysc_mouse ame: full=seryl-trna cytoplasmic ame: full=serine--trna ligase short= ame: full=seryl-trna(ser sec) synthetase
EMILISO_00885	GEFK01000873	661	65.75	4	chle_human ame: full=cholinesterase ame: full=acylcholine acylhydrolase ame: full=butyrylcholine esterase ame: full=choline esterase ii ame: full=pseudocholinesterase flags: precursor
EMILISO_00886	GEFK01000874	661	131.5	8	tba1a_rat ame: full=tubulin alpha-1a chain ame: full=alpha-tubulin 1 ame: full=tubulin alpha-1 chain
EMILISO_00887	GEFK01000875	662	131.3	8	if4a1_pantr ame: full=eukaryotic initiation factor 4a-i short=eif-4a-i short=eif4a-i ame: full=atp-dependent rna helicase eif4a-1
EMILISO_00888	GEFK01000876	659	82.43	5	pp2ba_human ame: full=serine threonine-protein phosphatase 2b catalytic subunit alpha isoform ame: full=cam-prp catalytic subunit ame: full=calmodulin-dependent calcineurin a subunit alpha isoform
EMILISO_00889	GEFK01000877	653	99.83	6	arhgc_human ame: full=rho guanine nucleotide exchange factor 12 ame: full=leukemia-associated
EMILISO_00890	GEFK01000878	660	362.16	22	ma1a2_human ame: full=mannosyl-oligosaccharide -alpha-mannosidase ib ame: full=mannosidase alpha class 1a member 2 ame: full=processing alpha- -mannosidase ib short=alpha- -mannosidase ib
EMILISO_00891	GEFK01000879	661	82.18	5	agkistrodon contortrix clone e33difj02gv37y microsatellite sequence
EMILISO_00892	GEFK01000880	659	115.41	7	cab39_human ame: full=calcium-binding protein 39 ame: full=protein mo25
EMILISO_00893	GEFK01000881	652	66.66	4	---NA---
EMILISO_00894	GEFK01000882	657	148.83	9	kcc2d_chick ame: full=calcium calmodulin-dependent protein kinase type ii delta chain short= kinase ii subunit delta short= -kinase ii delta chain short= -ii subunit delta
EMILISO_00895	GEFK01000883	654	232.58	14	p2rx4_mouse ame: full=p2x purinoceptor 4 short=p2x4 ame: full=atp receptor ame: full=purinergic receptor
EMILISO_00896	GEFK01000884	655	199.05	12	ubxn4_rat ame: full=ubx domain-containing protein 4 ame: full=erasin ame: full=ubx domain-containing protein 2
EMILISO_00897	GEFK01000885	655	298.58	18	rana rugosa got1 gene for glutamate oxaloacetate partial cds
EMILISO_00898	GEFK01000886	644	236.19	14	hyou1_chick ame: full=hypoxia up-regulated protein 1 flags: precursor
EMILISO_00899	GEFK01000887	654	116.29	7	degs1_chick ame: full=sphingolipid delta -desaturase des1 ame: full=degenerative spermatocyte homolog 1
EMILISO_00900	GEFK01000888	641	152.55	9	ckap4_human ame: full=cytoskeleton-associated protein 4 ame: full=63 kda membrane protein short=p63
EMILISO_00901	GEFK01000889	652	516.58	31	tmed9_mouse ame: full=transmembrane emp24 domain-containing protein 9 ame: full=glycoprotein 25l2 flags: precursor
EMILISO_00902	GEFK01000890	651	100.14	6	---NA---
EMILISO_00903	GEFK01000891	639	136.02	8	pantherophis guttatus hoxc13 complete cds and hoxc12 partial cds
EMILISO_00904	GEFK01000892	650	317.59	19	rs5_human ame: full=40s ribosomal protein s5 contains: ame: full=40s ribosomal protein n-terminally processed
EMILISO_00905	GEFK01000893	648	33.53	2	slk_human ame: full=ste20-like serine threonine-protein kinase short=ste20-like kinase short=hslk ame: full=ctcl tumor antigen se20-9 ame: full=ste20-related serine threonine-protein kinase short=ste20-related kinase ame: full=serine threonine-protein kinase 2
EMILISO_00906	GEFK01000894	649	786.82	47	rs8_human ame: full=40s ribosomal protein s8
EMILISO_00907	GEFK01000895	649	133.93	8	mus musculus riken cdna a530054k11 gene mrna
EMILISO_00908	GEFK01000896	644	151.84	9	nduaa_bovin ame: full=nadh dehydrogenase 1 alpha subcomplex subunit mitochondrial ame: full=complex i-42kd short=ci-42kd ame: full=nadh-ubiquinone oxidoreductase 42 kda subunit flags: precursor
EMILISO_00909	GEFK01000897	648	804.8	48	gp1_chlre ame: full=vegetative cell wall protein gp1 ame: full=hydroxyproline-rich glycoprotein 1 flags: precursor
EMILISO_00910	GEFK01000898	646	151.37	9	lat3_mouse ame: full=large neutral amino acids transporter small subunit 3 ame: full=l-type amino acid transporter 3 ame: full=solute carrier family 43 member 1
EMILISO_00911	GEFK01000899	648	519.77	31	philodryas olfersii cluster polf0063c c-type lectin complete cds
EMILISO_00912	GEFK01000900	645	134.76	8	at2a2_chick ame: full=sarcoplasmic endoplasmic reticulum calcium atpase 2 short=serca2 short=sr ca(2+)-atpase 2 ame: full=calcium pump 2
EMILISO_00913	GEFK01000901	644	101.23	6	hnrpd_mouse ame: full=heterogeneous nuclear ribonucleoprotein d0 short=hnrnp d0 ame: full=au-rich element rna-binding protein 1
EMILISO_00914	GEFK01000902	643	185.87	11	---NA---
EMILISO_00915	GEFK01000903	644	253.06	15	psa3_mouse ame: full=proteasome subunit alpha type-3 ame: full=macropain subunit c8 ame: full=multicatalytic endopeptidase complex subunit c8 ame: full=proteasome component c8 ame: full=proteasome subunit k
EMILISO_00916	GEFK01000904	643	270.35	16	ddx21_human ame: full=nucleolar rna helicase 2 ame: full=dead box protein 21 ame: full=gu-alpha ame: full=nucleolar rna helicase gu ame: full=nucleolar rna helicase ii ame: full=rh ii gu
EMILISO_00917	GEFK01000905	637	221.73	13	---NA---
EMILISO_00918	GEFK01000906	643	101.38	6	yo84_caeel ame: full= uncharacterized transposon-derived protein
EMILISO_00919	GEFK01000907	639	187.03	11	eif3a_mouse ame: full=eukaryotic translation initiation factor 3 subunit a short=eif3a ame: full=centrosomin ame: full=eukaryotic translation initiation factor 3 subunit 10 ame: full=eif-3-theta ame: full=eif3 p167 ame: full=eif3 p180 ame: full=eif3 p185 ame: full=p162
EMILISO_00920	GEFK01000908	638	51.09	3	syac_ponab ame: full=alanyl-trna cytoplasmic ame: full=alanine--trna ligase short=
EMILISO_00921	GEFK01000909	639	153.03	9	aftin_human ame: full=aftiphilin
EMILISO_00922	GEFK01000910	640	645.1	38	plbl1_mouse ame: full=phospholipase b-like 1 ame: full=lama-like protein 1 ame: full=lamina ancestor homolog 1 ame: full=phospholipase b domain-containing protein 1 flags: precursor
EMILISO_00923	GEFK01000911	640	288.6	17	irx1a_xenla ame: full=iroquois-class homeodomain protein irx-1-a ame: full=iroquois homeobox protein 1-a short=xiro-1 short=xiro1
EMILISO_00924	GEFK01000912	639	170.03	10	bace2_human ame: full=beta-secretase 2 ame: full=aspartic-like protease 56 kda ame: full=aspartyl protease 1 short=asp1 short=asp 1
EMILISO_00925	GEFK01000913	633	120.15	7	---NA---
EMILISO_00926	GEFK01000914	639	85.01	5	---NA---
EMILISO_00927	GEFK01000915	639	136.02	8	scam3_mouse ame: full=secretory carrier-associated membrane protein 3 short=secretory carrier membrane protein 3
EMILISO_00928	GEFK01000916	637	85.28	5	gfpt2_bovin ame: full=glucosamine--fructose-6-phosphate aminotransferase 2 ame: full=d-fructose-6-phosphate amidotransferase 2 ame: full=glutamine:fructose 6 phosphate amidotransferase 2 short=gfat 2 short=gfat2 ame: full=hexosephosphate aminotransferase 2
EMILISO_00929	GEFK01000917	624	330.82	19	anolis carolinensis prothymosin alpha-like mrna
EMILISO_00930	GEFK01000918	636	392.91	23	k1c18_human ame: full= type i cytoskeletal 18 ame: full=cell proliferation-inducing gene 46 protein ame: full=cytokeratin-18 short=ck-18 ame: full=keratin-18 short=k18
EMILISO_00931	GEFK01000919	628	173.01	10	---NA---
EMILISO_00932	GEFK01000920	633	154.48	9	anolis carolinensis tigger transposable element-derived protein 1-like mrna
EMILISO_00933	GEFK01000921	637	119.39	7	nduv1_ponpy ame: full=nadh dehydrogenase flavoprotein mitochondrial ame: full=complex i-51kd short=ci-51kd ame: full=nadh-ubiquinone oxidoreductase 51 kda subunit flags: precursor
EMILISO_00934	GEFK01000922	635	342.2	20	s61a1_bovin ame: full=protein transport protein sec61 subunit alpha isoform 1 short=sec61 alpha-1
EMILISO_00935	GEFK01000923	636	170.83	10	pantherophis guttatus hoxc13 complete cds and hoxc12 partial cds
EMILISO_00936	GEFK01000924	635	102.66	6	mdn1_human ame: full=midasin ame: full=midas-containing protein
EMILISO_00937	GEFK01000925	630	68.98	4	k6pp_rat ame: full=6-phosphofructokinase type c ame: full=phosphofructo-1-kinase isozyme c short=pfk-c ame: full=phosphofructokinase 1 ame: full=phosphohexokinase
EMILISO_00938	GEFK01000926	636	102.5	6	cg036_human ame: full=uncharacterized protein c7orf36
EMILISO_00939	GEFK01000927	632	51.57	3	---NA---
EMILISO_00940	GEFK01000928	634	68.55	4	agkistrodon contortrix clone e33difj02g6hog microsatellite sequence
EMILISO_00941	GEFK01000929	634	702.61	41	rbm3_mouse ame: full= rna-binding protein 3 ame: full=rna-binding motif protein 3
EMILISO_00942	GEFK01000930	634	171.37	10	golgin subfamily b member 1-like
EMILISO_00943	GEFK01000931	632	68.76	4	---NA---
EMILISO_00944	GEFK01000932	633	85.82	5	clpx_ponab ame: full=atp-dependent clp protease atp-binding subunit clpx- mitochondrial flags: precursor
EMILISO_00945	GEFK01000933	632	189.1	11	tgm2_chick ame: full=protein-glutamine gamma-glutamyltransferase 2 ame: full=tissue transglutaminase ame: full=transglutaminase c short=tg short=tgc short=tgase c ame: full=transglutaminase-2 short=tgase-2
EMILISO_00946	GEFK01000934	632	378.21	22	rl9_human ame: full=60s ribosomal protein l9
EMILISO_00947	GEFK01000935	632	154.72	9	b4gt3_bovin ame: full=beta- -galactosyltransferase 3 short=beta- - ase 3 short=beta4gal-t3 short=b4gal-t3 ame: full=udp-gal:beta- c beta- -galactosyltransferase 3
EMILISO_00948	GEFK01000936	631	120.53	7	sus scrofa dead (asp-glu-ala-asp) box polypeptide transcript variant 2 mrna
EMILISO_00949	GEFK01000937	626	156.2	9	dictyostelium purpureum large protein with the cpras domain mrna
EMILISO_00950	GEFK01000938	626	781.02	45	rs13_human ame: full=40s ribosomal protein s13
EMILISO_00951	GEFK01000939	628	207.61	12	---NA---
EMILISO_00952	GEFK01000940	629	621.83	36	agkistrodon contortrix clone e33difj02fpiag microsatellite sequence
EMILISO_00953	GEFK01000941	627	86.64	5	cpeb2_mouse ame: full=cytoplasmic polyadenylation element-binding protein 2 short=cpe-bp2 short=cpe-binding protein 2 short=mcpeb-2
EMILISO_00954	GEFK01000942	619	579.22	33	oaz1_chick ame: full=ornithine decarboxylase antizyme 1 short=odc-az
EMILISO_00955	GEFK01000943	626	433.9	25	cof2_mouse ame: full=cofilin-2 ame: full= muscle isoform
EMILISO_00956	GEFK01000944	627	155.95	9	tsn3_human ame: full=tetraspanin-3 short=tspan-3 ame: full=tetraspanin tm4-a ame: full=transmembrane 4 superfamily member 8
EMILISO_00957	GEFK01000945	628	138.41	8	myh9_rat ame: full=myosin-9 ame: full=cellular myosin heavy type a ame: full=myosin heavy chain 9 ame: full=myosin heavy non-muscle iia
EMILISO_00958	GEFK01000946	628	69.2	4	---NA---
EMILISO_00959	GEFK01000947	619	368.6	21	nucb2_human ame: full=nucleobindin-2 ame: full=dna-binding protein nefa ame: full=gastric cancer antigen zg4 flags: precursor
EMILISO_00960	GEFK01000948	627	207.94	12	co3_najna ame: full=complement c3 contains: ame: full=complement c3 beta chain contains: ame: full=complement c3 alpha chain contains
EMILISO_00961	GEFK01000949	625	295.52	17	tmm59_ponab ame: full=transmembrane protein 59 flags: precursor
EMILISO_00962	GEFK01000950	624	435.29	25	1433e_human ame: full=14-3-3 protein epsilon short=14-3-3e
EMILISO_00963	GEFK01000951	623	191.83	11	btg1_human ame: full=protein btg1 ame: full=b-cell translocation gene 1 protein
EMILISO_00964	GEFK01000952	621	157.46	9	cdon_human ame: full=cell adhesion molecule-related down-regulated by oncogenes flags: precursor
EMILISO_00965	GEFK01000953	623	279.03	16	tbb2c_rat ame: full=tubulin beta-2c chain
EMILISO_00966	GEFK01000954	622	139.74	8	---NA---
EMILISO_00967	GEFK01000955	622	157.21	9	elav1_mouse ame: full=elav-like protein 1 ame: full=elav-like generic protein ame: full=hu-antigen r short= ame: full=
EMILISO_00968	GEFK01000956	623	191.83	11	gstm1_bovin ame: full=glutathione s-transferase mu 1 ame: full=gst class-mu 1 ame: full=gstm1-1
EMILISO_00969	GEFK01000957	622	69.87	4	gallus gallus bac clone ch261-146h18 from chromosome complete sequence
EMILISO_00970	GEFK01000958	619	87.76	5	---NA---
EMILISO_00971	GEFK01000959	617	52.83	3	stim2_human ame: full=stromal interaction molecule 2 flags: precursor
EMILISO_00972	GEFK01000960	623	122.08	7	---NA---
EMILISO_00973	GEFK01000961	616	105.83	6	hbs1l_ponab ame: full=hbs1-like protein
EMILISO_00974	GEFK01000962	621	192.45	11	ro60_human ame: full=60 kda ss-a ro ribonucleoprotein short=60 kda ro protein short=60 kda ribonucleoprotein ro short= ame: full=ro 60 kda autoantigen
EMILISO_00975	GEFK01000963	621	192.45	11	luc7l_mouse ame: full= rna-binding protein luc7-like 1
EMILISO_00976	GEFK01000964	617	123.26	7	---NA---
EMILISO_00977	GEFK01000965	619	157.97	9	wnk3_human ame: full=serine threonine-protein kinase wnk3 ame: full=protein kinase lysine-deficient 3 ame: full=protein kinase with no lysine 3
EMILISO_00978	GEFK01000966	622	87.34	5	bach1_mouse ame: full=transcription regulator protein bach1 ame: full=btb and cnc homolog 1
EMILISO_00979	GEFK01000967	620	280.38	16	glna_chick ame: full=glutamine synthetase short=gs ame: full=glutamate decarboxylase ame: full=glutamate--ammonia ligase ame: full=p42
EMILISO_00980	GEFK01000968	614	141.56	8	tub_mouse ame: full=tubby protein
EMILISO_00981	GEFK01000969	614	389.29	22	rasef_mouse ame: full=ras and ef-hand domain-containing protein homolog
EMILISO_00982	GEFK01000970	614	106.17	6	bcr_mouse ame: full=breakpoint cluster region protein
EMILISO_00983	GEFK01000971	616	123.46	7	---NA---
EMILISO_00984	GEFK01000972	616	141.1	8	vps35_bovin ame: full=vacuolar protein sorting-associated protein 35 ame: full=vesicle protein sorting 35
EMILISO_00985	GEFK01000973	612	195.28	11	oryctolagus cuniculus connector enhancer of kinase suppressor of ras transcript variant 3 mrna
EMILISO_00986	GEFK01000974	608	142.96	8	---NA---
EMILISO_00987	GEFK01000975	612	337.31	19	agkistrodon contortrix clone e33difj02jfe7d microsatellite sequence
EMILISO_00989	GEFK01000977	612	159.78	9	cxar_human ame: full=coxsackievirus and adenovirus receptor short=car short=hcar ame: full=cvb3-binding protein ame: full=coxsackievirus b-adenovirus receptor ame: full=hcvadr flags: precursor
EMILISO_00990	GEFK01000978	612	1153.94	65	rl17_rat ame: full=60s ribosomal protein l17 ame: full=amino acid starvation-induced protein short=asi ame: full=l23
EMILISO_00991	GEFK01000979	612	230.79	13	lapemis hardwickii phosphatase-like partial sequence
EMILISO_00992	GEFK01000980	610	534.34	30	cib1_rat ame: full=calcium and integrin-binding protein 1 short=cib ame: full=calmyrin ame: full=dna-pkcs-interacting protein ame: full=kinase-interacting protein short=kip
EMILISO_00993	GEFK01000981	610	302.79	17	agkistrodon contortrix clone e33difj02h4ycz microsatellite sequence
EMILISO_00994	GEFK01000982	609	107.04	6	ctnd1_mouse ame: full=catenin delta-1 ame: full=cadherin-associated src substrate short=cas ame: full=p120 catenin short=p120 ame: full=p120
EMILISO_00995	GEFK01000983	609	160.56	9	oaz2_human ame: full=ornithine decarboxylase antizyme 2 short=az2 short=odc-az 2
EMILISO_00996	GEFK01000984	610	124.68	7	acyrthosiphon pisum myosin transcript variant 2 mrna
EMILISO_00997	GEFK01000985	609	178.4	10	---NA---
EMILISO_00998	GEFK01000986	602	54.14	3	agkistrodon contortrix clone e33difj02iww5x microsatellite sequence
EMILISO_00999	GEFK01000987	609	178.4	10	ern1_human ame: full=serine threonine-protein kinase endoribonuclease ire1 ame: full=endoplasmic reticulum-to-nucleus signaling 1 ame: full=inositol-requiring protein 1 short=hire1p
EMILISO_01000	GEFK01000988	608	125.09	7	anolis carolinensis transforming mrna
EMILISO_01001	GEFK01000989	610	195.92	11	cbpd_anapl ame: full=carboxypeptidase d ame: full=metallocarboxypeptidase d ame: full=gp180 ame: full=p170 flags: precursor
EMILISO_01002	GEFK01000990	609	178.4	10	kcc2d_chick ame: full=calcium calmodulin-dependent protein kinase type ii delta chain short= kinase ii subunit delta short= -kinase ii delta chain short= -ii subunit delta
EMILISO_01003	GEFK01000991	609	231.93	13	boiga irregularis glutaminyl cyclase complete cds
EMILISO_01004	GEFK01000992	594	128.04	7	Dictyostelium purpureum hypothetical protein, mRNA
EMILISO_01005	GEFK01000993	608	107.22	6	---NA---
EMILISO_01006	GEFK01000994	605	161.63	9	riok1_human ame: full=serine threonine-protein kinase rio1 ame: full=rio kinase 1
EMILISO_01007	GEFK01000995	606	125.5	7	agkistrodon contortrix clone e33difj02ji2wy microsatellite sequence
EMILISO_01008	GEFK01000996	606	107.57	6	ubac1_chick ame: full=ubiquitin-associated domain-containing protein 1 short=uba domain-containing protein 1 ame: full=e3 ubiquitin-protein ligase subunit kpc2 ame: full=kip1 ubiquitination-promoting complex protein 2
EMILISO_01009	GEFK01000997	605	179.58	10	spit1_human ame: full=kunitz-type protease inhibitor 1 ame: full=hepatocyte growth factor activator inhibitor type 1 short=hai-1 flags: precursor
EMILISO_01010	GEFK01000998	604	287.81	16	cyt_bitga ame: full=cystatin flags: precursor
EMILISO_01011	GEFK01000999	603	108.11	6	---NA---
EMILISO_01012	GEFK01001000	605	107.75	6	caza2_chick ame: full=f-actin-capping protein subunit alpha-2 ame: full=beta-actinin subunit i ame: full= 36 32
EMILISO_01013	GEFK01001001	597	91	5	rtf23_schpo ame: full=retrotransposable element tf2 155 kda protein type 3
EMILISO_01014	GEFK01001002	603	288.29	16	mus musculus bone marrow macrophage riken full-length enriched clone:g530009e20 product: full insert sequence
EMILISO_01015	GEFK01001003	599	126.97	7	hsp72_human ame: full=heat shock-related 70 kda protein 2 short=heat shock 70 kda protein 2
EMILISO_01016	GEFK01001004	603	108.11	6	imdh2_mouse ame: full=inosine-5 -monophosphate dehydrogenase 2 short=imp dehydrogenase 2 short=impd 2 short=impdh 2 ame: full=impdh-ii
EMILISO_01017	GEFK01001005	598	109.01	6	endonuclease-reverse transcriptase
EMILISO_01018	GEFK01001006	602	108.29	6	fam3a_human ame: full=protein fam3a ame: full=cytokine-like protein 2-19 flags: precursor
EMILISO_01019	GEFK01001007	604	179.88	10	qcr7_bovin ame: full=cytochrome b-c1 complex subunit 7 ame: full=complex iii subunit 7 ame: full=complex iii subunit vii ame: full=qp-c ame: full=ubiquinol-cytochrome c reductase complex 14 kda protein
EMILISO_01020	GEFK01001008	600	36.22	2	lc7l2_mouse ame: full= rna-binding protein luc7-like 2 ame: full=cgi-74 homolog
EMILISO_01021	GEFK01001009	601	198.86	11	rcn1_human ame: full=reticulocalbin-1 flags: precursor
EMILISO_01022	GEFK01001010	600	923.51	51	---NA---
EMILISO_01023	GEFK01001011	596	182.3	10	---NA---
EMILISO_01024	GEFK01001012	602	108.29	6	---NA---
EMILISO_01025	GEFK01001013	597	91	5	---NA---
EMILISO_01026	GEFK01001014	595	273.9	15	msln_rat ame: full=mesothelin ame: full=pre-pro-megakaryocyte-potentiating factor ame: full=protein expressed in renal carcinoma contains: ame: full=megakaryocyte-potentiating factor short=mpf contains: ame: full= cleaved form flags: precursor
EMILISO_01027	GEFK01001015	596	291.67	16	homo sapiens mrna for abo glycosyltransferase (abo gene) weak a allele
EMILISO_01028	GEFK01001016	598	308.87	17	adk_human ame: full=adenosine kinase short=ak ame: full=adenosine 5 -phosphotransferase
EMILISO_01029	GEFK01001017	592	128.47	7	agkistrodon contortrix clone e33difj02jnc9c microsatellite sequence
EMILISO_01030	GEFK01001018	598	109.01	6	eif3b_bovin ame: full=eukaryotic translation initiation factor 3 subunit b short=eif3b ame: full=eukaryotic translation initiation factor 3 subunit 9 ame: full=eif-3-eta
EMILISO_01031	GEFK01001019	595	109.56	6	herc4_human ame: full=probable e3 ubiquitin-protein ligase herc4 ame: full=hect domain and rcc1-like domain-containing protein 4
EMILISO_01032	GEFK01001020	594	91.45	5	anolis carolinensis translocating chain-associated membrane protein 1-like 1- transcript variant 2 mrna
EMILISO_01033	GEFK01001021	596	145.84	8	adck3_bovin ame: full=chaperone activity of bc1 complex- mitochondrial short=chaperone-abc1-like ame: full=aarf domain-containing protein kinase 3 flags: precursor
EMILISO_01034	GEFK01001022	595	310.42	17	crotalus adamanteus serine proteinase 3 complete cds
EMILISO_01035	GEFK01001023	593	128.25	7	mus musculus splicing factor proline glutamine rich (polypyrimidine tract binding protein associated) mrna (cdna clone image:5366736)
EMILISO_01036	GEFK01001024	593	714.55	39	verticillium albo-atrum mrna
EMILISO_01037	GEFK01001025	592	220.23	12	acod_bovin ame: full=acyl- desaturase ame: full=delta -desaturase short=delta-9 desaturase ame: full=fatty acid desaturase ame: full=stearoyl- desaturase
EMILISO_01038	GEFK01001026	594	292.66	16	ampn_chick ame: full=aminopeptidase n ame: full=aminopeptidase ey
EMILISO_01039	GEFK01001027	591	91.92	5	smap1_human ame: full=stromal membrane-associated protein 1
EMILISO_01040	GEFK01001028	592	146.82	8	big3_mouse ame: full=brefeldin a-inhibited guanine nucleotide-exchange protein 3
EMILISO_01041	GEFK01001029	590	184.15	10	---NA---
EMILISO_01042	GEFK01001030	589	737.85	40	rl15_rat ame: full=60s ribosomal protein l15
EMILISO_01043	GEFK01001031	593	91.61	5	m4k3_rat ame: full=mitogen-activated protein kinase kinase kinase kinase 3 ame: full=germinal center kinase-related protein kinase short=glk ame: full=mapk erk kinase kinase kinase 3 short=mek kinase kinase 3 short=mekkk 3
EMILISO_01044	GEFK01001032	589	110.68	6	ubp38_human ame: full=ubiquitin carboxyl-terminal hydrolase 38 ame: full=deubiquitinating enzyme 38 ame: full= ame: full=ubiquitin thiolesterase 38 ame: full=ubiquitin-specific-processing protease 38
EMILISO_01045	GEFK01001033	584	186.04	10	pan troglodytes nuclear factor i b mrna
EMILISO_01046	GEFK01001034	589	830.08	45	lec1_leimd ame: full=lectoxin-lei1 flags: precursor
EMILISO_01047	GEFK01001035	586	74.16	4	anolis carolinensis plasminogen activator inhibitor 1 rna-binding mrna
EMILISO_01048	GEFK01001036	588	147.82	8	if2p_ponab ame: full=eukaryotic translation initiation factor 5b short=eif-5b ame: full=translation initiation factor if-2
EMILISO_01049	GEFK01001037	587	111.05	6	---NA---
EMILISO_01050	GEFK01001038	587	74.04	4	ima4_human ame: full=importin subunit alpha-4 ame: full=importin alpha q1 short=qip1 ame: full=karyopherin subunit alpha-4
EMILISO_01051	GEFK01001039	586	241.03	13	manf_bovin ame: full=mesencephalic astrocyte-derived neurotrophic factor ame: full=arginine-rich protein ame: full=protein armet flags: precursor
EMILISO_01052	GEFK01001040	582	560.04	30	enpl_chick ame: full=endoplasmin ame: full=heat shock 108 kda protein short=hsp 108 short=hsp108 ame: full=heat shock protein 90 kda beta member 1 ame: full=transferrin-binding protein flags: precursor
EMILISO_01053	GEFK01001041	586	222.49	12	trfe_chick ame: full=ovotransferrin ame: full=allergen gal d iii ame: full=conalbumin ame: full=serum transferrin ame: allergen=gal d 3 flags: precursor
EMILISO_01054	GEFK01001042	584	130.23	7	---NA---
EMILISO_01055	GEFK01001043	578	93.99	5	---NA---
EMILISO_01056	GEFK01001044	577	75.32	4	---NA---
EMILISO_01057	GEFK01001045	582	186.68	10	anolis carolinensis prostaglandin e synthase 3-like mrna
EMILISO_01058	GEFK01001046	583	260.9	14	homo sapiens calcium binding protein 39 transcript variant mrna
EMILISO_01059	GEFK01001047	583	298.18	16	---NA---
EMILISO_01060	GEFK01001048	577	131.81	7	nemf_mouse ame: full=nuclear export mediator factor nemf ame: full=serologically defined colon cancer antigen 1 homolog
EMILISO_01061	GEFK01001049	583	149.09	8	fumh_pig ame: full=fumarate mitochondrial short=fumarase
EMILISO_01062	GEFK01001050	581	93.5	5	transmembrane 9 superfamily member 2
EMILISO_01063	GEFK01001051	582	205.35	11	tgm2_chick ame: full=protein-glutamine gamma-glutamyltransferase 2 ame: full=tissue transglutaminase ame: full=transglutaminase c short=tg short=tgc short=tgase c ame: full=transglutaminase-2 short=tgase-2
EMILISO_01064	GEFK01001052	580	93.66	5	agkistrodon contortrix clone e33difj02ijik8 microsatellite sequence
EMILISO_01065	GEFK01001053	579	619.24	33	ppib_chick ame: full=peptidyl-prolyl cis-trans isomerase b short=ppiase b ame: full=cyclophilin b ame: full=rotamase b ame: full=s-cyclophilin short=scylp flags: precursor
EMILISO_01066	GEFK01001054	581	149.6	8	rbm5_mouse ame: full=rna-binding protein 5 ame: full= tumor suppressor luca15 ame: full=rna-binding motif protein 5
EMILISO_01067	GEFK01001055	582	74.67	4	dictyostelium discoideum ax4 phosphatidylinositol-4-phosphate 5-kinase family protein complete cds
EMILISO_01068	GEFK01001056	580	187.32	10	gdir1_mouse ame: full=rho gdp-dissociation inhibitor 1 short=rho gdi 1 ame: full=gdi-1 ame: full=rho-gdi alpha
EMILISO_01069	GEFK01001057	582	354.69	19	tram1_bovin ame: full=translocating chain-associated membrane protein 1
EMILISO_01070	GEFK01001058	577	207.13	11	zebrafish dna sequence from clone ch211- complete sequence
EMILISO_01071	GEFK01001059	581	130.9	7	rab5b_chick ame: full=ras-related protein rab-5b
EMILISO_01072	GEFK01001060	575	566.86	30	mus musculus melanophilin mrna
EMILISO_01073	GEFK01001061	578	93.99	5	acaca_mouse ame: full=acetyl- carboxylase 1 short=acc1 ame: full=acc-alpha ame: full=acetyl- carboxylase 265 includes: ame: full=biotin carboxylase
EMILISO_01074	GEFK01001062	578	526.32	28	aldoa_rat ame: full=fructose-bisphosphate aldolase a ame: full=muscle-type aldolase
EMILISO_01075	GEFK01001063	577	433.09	23	hba_dryce ame: full=hemoglobin subunit alpha-a ame: full=alpha-a-globin ame: full=hemoglobin alpha-a chain
EMILISO_01076	GEFK01001064	577	866.17	46	rs4_chick ame: full=40s ribosomal protein s4
EMILISO_01077	GEFK01001065	575	188.95	10	---NA---
EMILISO_01078	GEFK01001066	574	170.35	9	flna_human ame: full=filamin-a short=fln-a ame: full=actin-binding protein 280 short=abp-280 ame: full=alpha-filamin ame: full=endothelial actin-binding protein ame: full=filamin-1 ame: full=non-muscle filamin
EMILISO_01079	GEFK01001067	575	340.12	18	trimeresurus flavoviridis vascular endothelial growth factor a190 isoform complete cds
EMILISO_01080	GEFK01001068	577	301.28	16	dyh7_rat ame: full=dynein heavy chain axonemal ame: full=axonemal beta dynein heavy chain 7 ame: full=axonemal dynein heavy chain b ame: full=ciliary dynein heavy chain 7 ame: full=dynein-like protein 7
EMILISO_01081	GEFK01001069	575	151.16	8	habp4_human ame: full=intracellular hyaluronan-binding protein 4 short=ihabp-4 short=ihabp4 ame: full=ki-1 57 intracellular antigen
EMILISO_01082	GEFK01001070	575	151.16	8	k1324_mouse ame: full=upf0577 protein kiaa1324 flags: precursor
EMILISO_01083	GEFK01001071	568	76.51	4	z518a_human ame: full=zinc finger protein 518a
EMILISO_01084	GEFK01001072	574	170.35	9	face2_mouse ame: full=caax prenyl protease 2 ame: full=farnesylated proteins-converting enzyme 2 short=face-2 ame: full=prenyl protein-specific endoprotease 2 ame: full=rce1 homolog
EMILISO_01085	GEFK01001073	573	56.88	3	drysdalia coronoides neurotoxin 513v14 complete sequence
EMILISO_01086	GEFK01001074	572	151.96	8	k1467_chick ame: full=uncharacterized protein kiaa1467 homolog
EMILISO_01087	GEFK01001075	574	511.06	27	halocynthia roretzi genes for adult body-wall muscle troponin adult cardiac troponin complete cds
EMILISO_01088	GEFK01001076	572	284.92	15	philodryas olfersii cluster polf0081c cysteine-rich secretory protein complete cds
EMILISO_01089	GEFK01001077	574	113.57	6	ttc17_human ame: full=tetratricopeptide repeat protein 17 short=tpr repeat protein 17
EMILISO_01090	GEFK01001078	573	132.73	7	t131l_bovin ame: full=transmembrane protein 131-like flags: precursor
EMILISO_01091	GEFK01001079	572	360.89	19	spcs2_macfa ame: full=signal peptidase complex subunit 2 ame: full=microsomal signal peptidase 25 kda subunit short=spase 25 kda subunit
EMILISO_01092	GEFK01001080	569	152.76	8	zn330_crigr ame: full=zinc finger protein 330 ame: full=nucleolar autoantigen 36 ame: full=nucleolar cysteine-rich protein
EMILISO_01093	GEFK01001081	571	171.25	9	rasef_xentr ame: full=ras and ef-hand domain-containing protein
EMILISO_01094	GEFK01001082	570	190.61	10	reg4_human ame: full=regenerating islet-derived protein 4 short=reg-4 ame: full=gastrointestinal secretory protein ame: full=reg-like protein ame: full=regenerating islet-derived protein iv short=reg iv flags: precursor
EMILISO_01095	GEFK01001083	570	76.24	4	---NA---
EMILISO_01096	GEFK01001084	572	284.92	15	if5a1_rabit ame: full=eukaryotic translation initiation factor 5a-1 short=eif-5a-1 short=eif-5a1 ame: full=eukaryotic initiation factor 5a isoform 1 short=eif-5a ame: full=eif-4d
EMILISO_01097	GEFK01001085	570	114.37	6	---NA---
EMILISO_01098	GEFK01001086	568	76.51	4	ubp7_chick ame: full=ubiquitin carboxyl-terminal hydrolase 7 ame: full=deubiquitinating enzyme 7 ame: full=ubiquitin thioesterase 7 ame: full=ubiquitin-specific-processing protease 7
EMILISO_01099	GEFK01001087	559	38.87	2	---NA---
EMILISO_01100	GEFK01001088	567	57.49	3	homo sapiens dead (asp-glu-ala-asp) box polypeptide x-linked transcript variant mrna
EMILISO_01101	GEFK01001089	571	228.33	12	mare1_xentr ame: full=microtubule-associated protein rp eb family member 1
EMILISO_01102	GEFK01001090	565	57.69	3	ece1_human ame: full=endothelin-converting enzyme 1 short=ece-1
EMILISO_01103	GEFK01001091	567	153.3	8	mus musculus bromodomain containing 2 transcript variant mrna
EMILISO_01104	GEFK01001092	567	57.49	3	crotalus adamanteus serine proteinase 3 complete cds
EMILISO_01105	GEFK01001093	569	668.31	35	monosiga brevicollis mx1 protein monbrdraft_34038 complete cds
EMILISO_01106	GEFK01001094	564	77.06	4	demansia psammophis voucher nr 3389 myosin heavy chain partial cds
EMILISO_01107	GEFK01001095	565	134.61	7	zzef1_human ame: full=zinc finger zz-type and ef-hand domain-containing protein 1
EMILISO_01108	GEFK01001096	566	76.78	4	pantherophis guttatus hoxc13 complete cds and hoxc12 partial cds
EMILISO_01109	GEFK01001097	567	440.72	23	rl27a_mouse ame: full=60s ribosomal protein l27a ame: full=l29
EMILISO_01110	GEFK01001098	563	77.19	4	nudc1_human ame: full= domain-containing protein 1 ame: full=chronic myelogenous leukemia tumor antigen 66 ame: full=tumor antigen cml66
EMILISO_01111	GEFK01001099	565	96.15	5	---NA---
EMILISO_01112	GEFK01001100	565	307.68	16	mlec_human ame: full=malectin flags: precursor
EMILISO_01113	GEFK01001101	565	96.15	5	tr150_human ame: full=thyroid hormone receptor-associated protein 3 ame: full=thyroid hormone receptor-associated protein complex 150 kda component short=trap150
EMILISO_01114	GEFK01001102	563	135.09	7	---NA---
EMILISO_01115	GEFK01001103	562	115.99	6	exoc7_mouse ame: full=exocyst complex component 7 ame: full=exocyst complex component exo70
EMILISO_01116	GEFK01001104	565	269.22	14	reverse transcriptase
EMILISO_01117	GEFK01001105	562	96.66	5	strap_chick ame: full=serine-threonine kinase receptor-associated protein
EMILISO_01118	GEFK01001106	554	156.89	8	---NA---
EMILISO_01119	GEFK01001107	560	252.22	13	---NA---
EMILISO_01120	GEFK01001108	559	388.72	20	rl11_chila ame: full=60s ribosomal protein l11
EMILISO_01121	GEFK01001109	562	193.32	10	rab10_human ame: full=ras-related protein rab-10
EMILISO_01122	GEFK01001110	561	271.14	14	ndk_colli ame: full=nucleoside diphosphate kinase short=ndk short=ndp kinase
EMILISO_01123	GEFK01001111	560	116.41	6	endonuclease-reverse transcriptase
EMILISO_01124	GEFK01001112	560	116.41	6	eif3i_taegu ame: full=eukaryotic translation initiation factor 3 subunit i short=eif3i ame: full=eukaryotic translation initiation factor 3 subunit 2 ame: full=eif-3-beta ame: full=eif3 p36
EMILISO_01125	GEFK01001113	562	135.33	7	dctn1_xenla ame: full=dynactin subunit 1
EMILISO_01126	GEFK01001114	560	368.63	19	tagl2_rat ame: full=transgelin-2
EMILISO_01127	GEFK01001115	562	193.32	10	---NA---
EMILISO_01128	GEFK01001116	559	136.05	7	dedd2_human ame: full=dna-binding death effector domain-containing protein 2 ame: full=ded-containing protein flame-3 ame: full=fadd-like anti-apoptotic molecule 3
EMILISO_01129	GEFK01001117	561	116.2	6	---NA---
EMILISO_01130	GEFK01001118	560	1164.09	60	hbb2_najna ame: full=hemoglobin subunit beta-2 ame: full=beta-2-globin ame: full=hemoglobin beta-2 chain ame: full=hemoglobin beta-ii chain
EMILISO_01131	GEFK01001119	558	155.77	8	anolis carolinensis uncharacterized protein c19orf47 homolog mrna
EMILISO_01132	GEFK01001120	557	273.08	14	pttg_mouse ame: full=pituitary tumor-transforming gene 1 protein-interacting protein ame: full=pituitary tumor-transforming gene protein-binding factor short=pbf short=pttg-binding factor flags: precursor
EMILISO_01133	GEFK01001121	559	213.8	11	---NA---
EMILISO_01134	GEFK01001122	556	58.62	3	ls14a_ponab ame: full=protein lsm14 homolog a ame: full=protein fam61a ame: full=rna-associated protein 55a
EMILISO_01135	GEFK01001123	555	352.37	18	selm_xenla ame: full=selenoprotein m short= flags: precursor
EMILISO_01136	GEFK01001124	557	78.02	4	meleagris gallopavo eukaryotic translation initiation factor 5a-2-like partial mrna
EMILISO_01137	GEFK01001125	553	353.65	18	---NA---
EMILISO_01138	GEFK01001126	555	78.31	4	pantherophis guttatus hoxc13 complete cds and hoxc12 partial cds
EMILISO_01139	GEFK01001127	554	235.34	12	osbl5_human ame: full=oxysterol-binding protein 5 short=orp-5 short=osbp-related protein 5 ame: full=oxysterol-binding protein homolog 1
EMILISO_01140	GEFK01001128	555	156.61	8	---NA---
EMILISO_01141	GEFK01001129	554	117.67	6	---NA---
EMILISO_01142	GEFK01001130	553	235.76	12	adcy8_rat ame: full=adenylate cyclase type 8 ame: full=atp pyrophosphate-lyase 8 ame: full=adenylate cyclase type viii ame: full=adenylyl cyclase 8 ame: full=ca(2+) calmodulin-activated adenylyl cyclase
EMILISO_01143	GEFK01001131	548	198.26	10	monodelphis domestica abl-interactor 1 mrna
EMILISO_01144	GEFK01001132	554	98.06	5	---NA---
EMILISO_01145	GEFK01001133	554	58.83	3	---NA---
EMILISO_01146	GEFK01001134	552	236.19	12	tmed2_crigr ame: full=transmembrane emp24 domain-containing protein 2 ame: full=copi-coated vesicle membrane protein p24 flags: precursor
EMILISO_01147	GEFK01001135	553	78.59	4	tflgtftbpatrimeresurus flavoviridis g gene for tata-box binding complete cds
EMILISO_01148	GEFK01001136	546	59.7	3	gapd1_bovin ame: full=gtpase-activating protein and vps9 domain-containing protein 1
EMILISO_01149	GEFK01001137	553	196.47	10	prdx4_human ame: full=peroxiredoxin-4 ame: full=antioxidant enzyme aoe372 short=aoe37-2 ame: full=peroxiredoxin iv short=prx-iv ame: full=thioredoxin peroxidase ao372 ame: full=thioredoxin-dependent peroxide reductase a0372 flags: precursor
EMILISO_01150	GEFK01001138	551	78.87	4	---NA---
EMILISO_01151	GEFK01001139	552	98.41	5	---NA---
EMILISO_01152	GEFK01001140	550	98.77	5	glpk5_human ame: full= glycerol kinase 5 short=gk 5 short=glycerokinase 5 ame: full=atp:glycerol 3-phosphotransferase 5
EMILISO_01153	GEFK01001141	551	157.75	8	kdm5b_chick ame: full=lysine-specific demethylase 5b ame: full=histone demethylase jarid1b ame: full=jumonji arid domain-containing protein 1b
EMILISO_01154	GEFK01001142	551	157.75	8	---NA---
EMILISO_01155	GEFK01001143	550	79.02	4	ar6p1_ponab ame: full=adp-ribosylation factor-like protein 6-interacting protein 1 short=arl-6-interacting protein 1 short=aip-1 ame: full=protein tbx2
EMILISO_01156	GEFK01001144	547	59.59	3	elaphe quadrivirgata mrna for phospholipase a2 complete cds
EMILISO_01157	GEFK01001145	548	158.61	8	---NA---
EMILISO_01158	GEFK01001146	550	177.79	9	copd_rat ame: full=coatomer subunit delta ame: full=archain ame: full=delta-coat protein short=delta-cop
EMILISO_01159	GEFK01001147	550	237.05	12	vigln_chick ame: full=vigilin
EMILISO_01160	GEFK01001148	545	159.48	8	lin1_nycco ame: full=line-1 reverse transcriptase homolog
EMILISO_01161	GEFK01001149	548	257.74	13	s10aa_pig ame: full=protein s100-a10 ame: full=calpactin i light chain ame: full=calpactin-1 light chain ame: full=cellular ligand of annexin ii ame: full=s100 calcium-binding protein a10 ame: full=p10 protein ame: full=p11
EMILISO_01162	GEFK01001150	546	358.18	18	crotalus adamanteus serine proteinase 3 complete cds
EMILISO_01163	GEFK01001151	546	298.48	15	clk1_human ame: full=dual specificity protein kinase clk1 ame: full=cdc-like kinase 1
EMILISO_01164	GEFK01001152	546	218.89	11	anolis carolinensis serine arginine-rich splicing factor 4-like mrna
EMILISO_01165	GEFK01001153	549	217.69	11	---NA---
EMILISO_01166	GEFK01001154	542	80.18	4	---NA---
EMILISO_01167	GEFK01001155	545	79.74	4	bungarus multicinctus pilp-1 gene for protease inhibitor-like protein exons 1-3
EMILISO_01168	GEFK01001156	546	79.6	4	p5cs_mouse ame: full=delta-1-pyrroline-5-carboxylate synthase short=p5cs ame: full=aldehyde dehydrogenase family 18 member a1 includes: ame: full=glutamate 5-kinase short=gk ame: full=gamma-glutamyl kinase
EMILISO_01169	GEFK01001157	547	198.63	10	serine threonine-protein kinase wnk3-like
EMILISO_01170	GEFK01001158	547	59.59	3	myo10_human ame: full=myosin-x ame: full=unconventional myosin-10
EMILISO_01171	GEFK01001159	547	139.04	7	zn783_human ame: full=protein znf783
EMILISO_01172	GEFK01001160	547	119.18	6	meleagris gallopavo myosin-9-like miscrna
EMILISO_01173	GEFK01001161	537	80.93	4	agkistrodon contortrix clone e33difj02f7ws1 microsatellite sequence
EMILISO_01174	GEFK01001162	545	119.61	6	---NA---
EMILISO_01175	GEFK01001163	546	258.69	13	ma1a2_human ame: full=mannosyl-oligosaccharide -alpha-mannosidase ib ame: full=mannosidase alpha class 1a member 2 ame: full=processing alpha- -mannosidase ib short=alpha- -mannosidase ib
EMILISO_01176	GEFK01001164	543	180.08	9	entp2_mouse ame: full=ectonucleoside triphosphate diphosphohydrolase 2 short=ntpdase 2 ame: full=cd39 antigen-like 1 ame: full=ecto-atp diphosphohydrolase 2 short=ecto-atpdase 2 short=ecto-atpase 2
EMILISO_01177	GEFK01001165	543	40.02	2	tf3c1_human ame: full=general transcription factor 3c polypeptide 1 ame: full=tf3c-alpha ame: full=tfiiic box b-binding subunit ame: full=transcription factor iiic 220 kda subunit short=tfiiic 220 kda subunit short=tfiiic220 ame: full=transcription factor iiic subunit alpha
EMILISO_01178	GEFK01001166	544	59.92	3	pol2_mouse ame: full=retrovirus-related pol polyprotein line-1 ame: full=long interspersed element-1 short=l1 includes: ame: full=reverse transcriptase includes: ame: full=endonuclease
EMILISO_01179	GEFK01001167	544	99.86	5	loc100137634 protein
EMILISO_01180	GEFK01001168	540	80.48	4	---NA---
EMILISO_01181	GEFK01001169	541	160.66	8	---NA---
EMILISO_01182	GEFK01001170	543	220.1	11	tb182_mouse ame: full=182 kda tankyrase-1-binding protein
EMILISO_01183	GEFK01001171	543	320.14	16	uhrf1-binding protein 1-like
EMILISO_01184	GEFK01001172	534	142.42	7	---NA---
EMILISO_01185	GEFK01001173	542	200.46	10	rm24_xenla ame: full=probable 39s ribosomal protein mitochondrial short=l24mt short=mrp-l24 flags: precursor
EMILISO_01186	GEFK01001174	537	161.86	8	---NA---
EMILISO_01187	GEFK01001175	541	40.17	2	camp1_human ame: full=calmodulin-regulated spectrin-associated protein 1
EMILISO_01188	GEFK01001176	540	40.24	2	---NA---
EMILISO_01189	GEFK01001177	546	79.6	4	dlgp5_human ame: full=disks large-associated protein 5 short=dap-5 ame: full=discs large homolog 7 ame: full=disks large-associated protein dlg7 ame: full=hepatoma up-regulated protein short=hurp
EMILISO_01190	GEFK01001178	523	145.42	7	agkistrodon contortrix clone e33difj02jj24c microsatellite sequence
EMILISO_01191	GEFK01001179	538	80.78	4	homo sapiens nuclear factor i b transcript variant mrna
EMILISO_01192	GEFK01001180	538	80.78	4	psmd5_human ame: full=26s proteasome non-atpase regulatory subunit 5 ame: full=26s protease subunit s5 basic ame: full=26s proteasome subunit s5b
EMILISO_01193	GEFK01001181	539	60.47	3	gpda_bovin ame: full=glycerol-3-phosphate dehydrogenase cytoplasmic short=gpd-c short=gpdh-c
EMILISO_01194	GEFK01001182	540	80.48	4	ssbp3_human ame: full=single-stranded dna-binding protein 3 ame: full=sequence-specific single-stranded-dna-binding protein
EMILISO_01195	GEFK01001183	540	221.32	11	---NA---
EMILISO_01196	GEFK01001184	539	161.26	8	nomascus leucogenys nuclear factor 1 b-type-like mrna
EMILISO_01197	GEFK01001185	539	100.79	5	syep_human ame: full=bifunctional aminoacyl-trna synthetase ame: full=cell proliferation-inducing gene 32 protein includes: ame: full=glutamyl-trna synthetase ame: full=glutamate--trna ligase short= includes: ame: full=prolyl-trna synthetase ame: full=proline--trna ligase
EMILISO_01198	GEFK01001186	537	80.93	4	anolis carolinensis rna-binding protein 3- transcript variant 1 mrna
EMILISO_01199	GEFK01001187	539	1048.18	52	cox2_dinse ame: full=cytochrome c oxidase subunit 2 ame: full=cytochrome c oxidase polypeptide ii
EMILISO_01200	GEFK01001188	538	40.39	2	---NA---
EMILISO_01201	GEFK01001189	539	80.63	4	cftr_dasno ame: full=cystic fibrosis transmembrane conductance regulator short=cftr ame: full=atp-binding cassette sub-family c member 7 ame: full=channel conductance-controlling atpase ame: full=camp-dependent chloride channel
EMILISO_01202	GEFK01001190	535	60.92	3	agkistrodon contortrix clone e33difj02iww5x microsatellite sequence
EMILISO_01203	GEFK01001191	535	182.77	9	leg6_mouse ame: full=galectin-6 short=gal-6
EMILISO_01204	GEFK01001192	537	101.16	5	ctr4_mouse ame: full=cationic amino acid transporter 4 short=cat-4 short=cat4 ame: full=solute carrier family 7 member 4
EMILISO_01205	GEFK01001193	535	162.46	8	182 kda tankyrase-1-binding
EMILISO_01206	GEFK01001194	536	182.43	9	sucb1_mouse ame: full=succinyl- ligase subunit mitochondrial ame: full=atp-specific succinyl- synthetase subunit beta ame: full=succinyl- synthetase beta-a chain short=scs-betaa flags: precursor
EMILISO_01207	GEFK01001195	535	40.62	2	---NA---
EMILISO_01208	GEFK01001196	536	283.78	14	---NA---
EMILISO_01209	GEFK01001197	535	40.62	2	baip2_rat ame: full=brain-specific angiogenesis inhibitor 1-associated protein 2 short=bai-associated protein 2 short=bai1-associated protein 2 ame: full=insulin receptor substrate protein of 53 kda short=irsp53 short=insulin receptor substrate p53
EMILISO_01210	GEFK01001198	536	202.7	10	anolis carolinensis f-box protein 11 mrna
EMILISO_01211	GEFK01001199	533	183.46	9	anolis carolinensis phospholipase beta 4 mrna
EMILISO_01212	GEFK01001200	535	142.16	7	psme2_rat ame: full=proteasome activator complex subunit 2 ame: full=11s regulator complex subunit beta short=reg-beta ame: full=activator of multicatalytic protease subunit 2 ame: full=proteasome activator 28 subunit beta short=pa28b short=pa28beta
EMILISO_01213	GEFK01001201	533	81.54	4	---NA---
EMILISO_01214	GEFK01001202	534	142.42	7	rod1_human ame: full=regulator of differentiation 1 short=rod1
EMILISO_01215	GEFK01001203	535	203.08	10	---NA---
EMILISO_01216	GEFK01001204	533	224.23	11	psa1_chick ame: full=proteasome subunit alpha type-1 ame: full=macropain subunit c2 ame: full=multicatalytic endopeptidase complex subunit c2 ame: full=proteasome component c2
EMILISO_01217	GEFK01001205	513	84.72	4	anolis carolinensis eukaryotic peptide chain release factor subunit 1-like mrna
EMILISO_01218	GEFK01001206	531	102.31	5	agkistrodon contortrix clone e33difj02hiz5y microsatellite sequence
EMILISO_01219	GEFK01001207	533	203.84	10	ctr4_mouse ame: full=cationic amino acid transporter 4 short=cat-4 short=cat4 ame: full=solute carrier family 7 member 4
EMILISO_01220	GEFK01001208	530	41	2	monodelphis domestica serine threonine kinase 38 mrna
EMILISO_01221	GEFK01001209	532	122.54	6	rattus norvegicus tl0aca34yp08 mrna sequence
EMILISO_01222	GEFK01001210	522	41.63	2	bothrops jararaca bradykinin-potentiating c-type natriuretic peptide-related pseudogene complete sequence
EMILISO_01223	GEFK01001211	532	122.54	6	cab45_xentr ame: full=45 kda calcium-binding protein short=cab45 ame: full=stromal cell-derived factor 4 short=sdf-4 flags: precursor
EMILISO_01224	GEFK01001212	530	61.5	3	agkistrodon contortrix clone e33difj02jotsj microsatellite sequence
EMILISO_01225	GEFK01001213	532	61.27	3	amer1_ponab ame: full=amme syndrome candidate gene 1 protein homolog
EMILISO_01226	GEFK01001214	532	204.23	10	---NA---
EMILISO_01227	GEFK01001215	531	81.84	4	---NA---
EMILISO_01228	GEFK01001216	533	203.84	10	jard2_chick ame: full=protein jumonji ame: full=jumonji arid domain-containing protein 2
EMILISO_01229	GEFK01001217	532	183.8	9	---NA---
EMILISO_01230	GEFK01001218	526	227.21	11	hsp7c_bovin ame: full=heat shock cognate 71 kda protein ame: full=heat shock 70 kda protein 8
EMILISO_01231	GEFK01001219	531	327.38	16	basi_chick ame: full=basigin ame: full=5a11 antigen ame: full=blood-brain barrier ht7 antigen ame: full=neurothelin flags: precursor
EMILISO_01232	GEFK01001220	531	225.07	11	gdib_human ame: full=rab gdp dissociation inhibitor beta short=rab gdi beta ame: full=guanosine diphosphate dissociation inhibitor 2 short=gdi-2
EMILISO_01233	GEFK01001221	531	184.15	9	---NA---
EMILISO_01234	GEFK01001222	528	144.04	7	pan3_human ame: full=pab-dependent poly -specific ribonuclease subunit 3 short=hpan3
EMILISO_01235	GEFK01001223	530	123	6	---NA---
EMILISO_01236	GEFK01001224	529	123.23	6	---NA---
EMILISO_01237	GEFK01001225	529	41.08	2	serine threonine-protein phosphatase 4 regulatory subunit 2-like isoform 2
EMILISO_01238	GEFK01001226	527	82.47	4	agkistrodon contortrix clone e33difj02j3che microsatellite sequence
EMILISO_01239	GEFK01001227	526	61.97	3	elaphe quadrivirgata mrna for phospholipase a2 complete cds
EMILISO_01240	GEFK01001228	529	267	13	tram1_human ame: full=translocating chain-associated membrane protein 1
EMILISO_01241	GEFK01001229	529	143.77	7	ogt1_rat ame: full=udp-n-acetylglucosamine--peptide n-acetylglucosaminyltransferase 110 kda subunit ame: full=o- c transferase subunit p110 ame: full=o-linked n-acetylglucosamine transferase 110 kda subunit
EMILISO_01242	GEFK01001230	529	82.15	4	---NA---
EMILISO_01243	GEFK01001231	529	61.62	3	---NA---
EMILISO_01244	GEFK01001232	527	103.08	5	agkistrodon contortrix clone e33difj02iww5x microsatellite sequence
EMILISO_01245	GEFK01001233	526	61.97	3	anolis carolinensis zar1-like mrna
EMILISO_01246	GEFK01001234	528	535.01	26	micrurus corallinus mcor0067c c-type lectin complete cds
EMILISO_01247	GEFK01001235	529	143.77	7	sept6_human ame: full=septin-6
EMILISO_01248	GEFK01001236	525	82.78	4	goga2_human ame: full=golgin subfamily a member 2 ame: full=130 kda cis-golgi matrix protein short=gm130 ame: full=gm130 autoantigen ame: full=golgin-95
EMILISO_01249	GEFK01001237	523	145.42	7	---NA---
EMILISO_01250	GEFK01001238	528	144.04	7	gmds_crigr ame: full=gdp-mannose dehydratase ame: full=gdp-d-mannose dehydratase short=gmd
EMILISO_01251	GEFK01001239	527	41.23	2	if4g3_mouse ame: full=eukaryotic translation initiation factor 4 gamma 3 short=eif-4-gamma 3 short=eif-4g 3 short=eif4g 3 ame: full=eif-4-gamma ii short=eif4gii
EMILISO_01252	GEFK01001240	527	185.55	9	mus musculus 12 days embryo spinal ganglion riken full-length enriched clone:d130066h20 product: protein phosphatase regulatory subunit 1a full insert sequence
EMILISO_01253	GEFK01001241	528	226.35	11	cox5b_ponab ame: full=cytochrome c oxidase subunit mitochondrial ame: full=cytochrome c oxidase polypeptide vb flags: precursor
EMILISO_01254	GEFK01001242	528	61.73	3	---NA---
EMILISO_01255	GEFK01001243	525	62.08	3	tut7_mouse ame: full=terminal uridylyltransferase 7 short=tutase 7 ame: full=zinc finger cchc domain-containing protein 6
EMILISO_01256	GEFK01001244	525	248.34	12	---NA---
EMILISO_01257	GEFK01001245	526	41.31	2	nktr_mouse ame: full=nk-tumor recognition protein short=nk-tr protein ame: full=natural-killer cells cyclophilin-related protein
EMILISO_01258	GEFK01001246	527	82.47	4	---NA---
EMILISO_01259	GEFK01001247	522	83.26	4	anolis carolinensis solute carrier family 12 (sodium potassium chloride transporters) member 2 mrna
EMILISO_01260	GEFK01001248	526	165.24	8	znt7_chick ame: full=zinc transporter 7 short= -7 ame: full=solute carrier family 30 member 7
EMILISO_01261	GEFK01001249	525	62.08	3	PREDICTED: Gallus gallus hypothetical protein LOC769445 (LOC769445), mRNA
EMILISO_01262	GEFK01001250	525	41.39	2	---NA---
EMILISO_01263	GEFK01001251	522	145.7	7	polx_tobac ame: full=retrovirus-related pol polyprotein from transposon tnt 1-94 includes: ame: full=protease includes: ame: full=reverse transcriptase includes: ame: full=endonuclease
EMILISO_01264	GEFK01001252	524	103.67	5	rhabdophis tigrinus mitochondrial uncoupling protein a complete cds nuclear gene for mitochondrial product
EMILISO_01265	GEFK01001253	524	82.94	4	---NA---
EMILISO_01266	GEFK01001254	522	83.26	4	---NA---
EMILISO_01267	GEFK01001255	523	103.87	5	---NA---
EMILISO_01268	GEFK01001256	523	124.64	6	---NA---
EMILISO_01269	GEFK01001257	523	540.13	26	ybox1_xenla ame: full=nuclease-sensitive element-binding protein 1 ame: full=y-box transcription factor ame: full=y-box-binding protein 1 short=yb-1
EMILISO_01270	GEFK01001258	522	187.32	9	uhrf1-binding protein 1-like
EMILISO_01271	GEFK01001259	521	104.27	5	s35b1_chick ame: full=solute carrier family 35 member b1 ame: full=endoplasmic reticulum nucleotide sugar transporter 1
EMILISO_01272	GEFK01001260	519	104.67	5	t2ag_human ame: full=transcription initiation factor iia subunit 2 ame: full=general transcription factor iia subunit 2 ame: full=tfiia p12 subunit short=tfiia-12 short=tfiias ame: full=transcription initiation factor iia gamma chain short=tfiia-gamma
EMILISO_01273	GEFK01001261	519	104.67	5	anolis carolinensis son of sevenless homolog 2 mrna
EMILISO_01274	GEFK01001262	521	83.42	4	---NA---
EMILISO_01275	GEFK01001263	526	61.97	3	cq028_mouse ame: full=upf0663 transmembrane protein c17orf28 homolog
EMILISO_01276	GEFK01001264	516	147.39	7	adenine phosphoribosyltransferase-like
EMILISO_01277	GEFK01001265	521	229.39	11	thoc4_taegu ame: full=tho complex subunit 4 short=tho4
EMILISO_01278	GEFK01001266	520	104.47	5	---NA---
EMILISO_01279	GEFK01001267	522	62.44	3	zbt26_human ame: full=zinc finger and btb domain-containing protein 26 ame: full=zinc finger protein 481 ame: full=zinc finger protein bioref
EMILISO_01280	GEFK01001268	521	83.42	4	trimeresurus flavoviridis phospholipase a2 gene cluster ( 1 3 5)
EMILISO_01281	GEFK01001269	521	145.98	7	vmmtd_agkhb ame: full=zinc metalloproteinase disintegrin contains: ame: full=metalloproteinase mt-d contains: ame: full=disintegrin flags: precursor
EMILISO_01282	GEFK01001270	519	167.47	8	khdr1_chick ame: full=kh domain- rna- signal transduction-associated protein 1 ame: full=src-associated in mitosis 68 kda protein short=sam68
EMILISO_01283	GEFK01001271	519	167.47	8	---NA---
EMILISO_01284	GEFK01001272	517	84.06	4	---NA---
EMILISO_01285	GEFK01001273	516	126.34	6	---NA---
EMILISO_01286	GEFK01001274	516	126.34	6	---NA---
EMILISO_01287	GEFK01001275	520	146.26	7	anolis carolinensis hypothetical loc100567290 miscrna
EMILISO_01288	GEFK01001276	518	146.82	7	novel protein
EMILISO_01289	GEFK01001277	517	63.05	3	---NA---
EMILISO_01290	GEFK01001278	520	167.15	8	echis ocellatus mrna for group iii snake venom metalloproteinase (svmp3-eoc1 gene) clone eo_venom_04e07
EMILISO_01291	GEFK01001279	519	62.8	3	tbcd7_mouse ame: full=tbc1 domain family member 7
EMILISO_01292	GEFK01001280	519	41.87	2	anolis carolinensis solute carrier family 12 (sodium potassium chloride transporters) member 2 mrna
EMILISO_01293	GEFK01001281	518	335.59	16	qsox1_chick ame: full=sulfhydryl oxidase 1 ame: full=quiescin q6 flags: precursor
EMILISO_01294	GEFK01001282	519	83.74	4	---NA---
EMILISO_01295	GEFK01001283	518	146.82	7	chst9_human ame: full=carbohydrate sulfotransferase 9 ame: full= c-4-o-sulfotransferase 2 short= c-4-st2 short= c4st-2 ame: full=n-acetylgalactosamine-4-o-sulfotransferase 2
EMILISO_01296	GEFK01001284	518	41.95	2	---NA---
EMILISO_01297	GEFK01001285	515	210.97	10	mus musculus nod-derived cd11c +ve dendritic cells riken full-length enriched clone:f630228c18 product: full insert sequence
EMILISO_01298	GEFK01001286	518	125.85	6	eif3j_chick ame: full=eukaryotic translation initiation factor 3 subunit j short=eif3j ame: full=eukaryotic translation initiation factor 3 subunit 1 ame: full=eif-3-alpha ame: full=eif3 p35
EMILISO_01299	GEFK01001287	509	149.42	7	huntingtin-interacting protein 1-like
EMILISO_01300	GEFK01001288	515	126.58	6	csk21_mouse ame: full=casein kinase ii subunit alpha short=ck ii alpha
EMILISO_01301	GEFK01001289	515	126.58	6	xenopus laevis galectin-related protein (hspc159-a) mrna
EMILISO_01302	GEFK01001290	517	84.06	4	usp9x_human ame: full=probable ubiquitin carboxyl-terminal hydrolase faf-x ame: full=deubiquitinating enzyme faf-x ame: full=fat facets in mammals short=hfam ame: full=fat facets x-linked
EMILISO_01303	GEFK01001291	516	126.34	6	rtf23_schpo ame: full=retrotransposable element tf2 155 kda protein type 3
EMILISO_01304	GEFK01001292	513	84.72	4	cfab_gorgo ame: full=complement factor b ame: full=c3 c5 convertase contains: ame: full=complement factor b ba fragment contains: ame: full=complement factor b bb fragment flags: precursor
EMILISO_01305	GEFK01001293	512	148.54	7	ddx6_chick ame: full=probable atp-dependent rna helicase ddx6 ame: full=dead box protein 6
EMILISO_01306	GEFK01001294	512	84.88	4	galt7_rat ame: full=n-acetylgalactosaminyltransferase 7 ame: full=polypeptide c transferase 7 short= c-t7 short=pp- ase 7 ame: full=protein-udp acetylgalactosaminyltransferase 7 ame: full=udp- c:polypeptide n-acetylgalactosaminyltransferase 7
EMILISO_01307	GEFK01001295	516	84.22	4	---NA---
EMILISO_01308	GEFK01001296	511	63.79	3	---NA---
EMILISO_01309	GEFK01001297	515	189.87	9	---NA---
EMILISO_01310	GEFK01001298	514	84.55	4	---NA---
EMILISO_01311	GEFK01001299	514	126.83	6	f168a_mouse ame: full=protein fam168a
EMILISO_01312	GEFK01001300	513	296.51	14	tmeda_bovin ame: full=transmembrane emp24 domain-containing protein 10 ame: full=21 kda transmembrane-trafficking protein ame: full=transmembrane protein tmp21 flags: precursor
EMILISO_01313	GEFK01001301	510	63.91	3	macaca mulatta eomesodermin homolog (xenopus laevis) transcript variant 1 mrna
EMILISO_01314	GEFK01001302	515	126.58	6	---NA---
EMILISO_01315	GEFK01001303	515	210.97	10	cox5a_ponpy ame: full=cytochrome c oxidase subunit mitochondrial ame: full=cytochrome c oxidase polypeptide va flags: precursor
EMILISO_01316	GEFK01001304	513	63.54	3	---NA---
EMILISO_01317	GEFK01001305	516	189.5	9	pical_human ame: full=phosphatidylinositol-binding clathrin assembly protein ame: full=clathrin assembly lymphoid myeloid leukemia protein
EMILISO_01318	GEFK01001306	507	64.29	3	---NA---
EMILISO_01319	GEFK01001307	513	42.36	2	---NA---
EMILISO_01320	GEFK01001308	514	190.24	9	osbl5_mouse ame: full=oxysterol-binding protein 5 short=orp-5 short=osbp-related protein 5 ame: full=oxysterol-binding protein homolog 1
EMILISO_01321	GEFK01001309	514	317.07	15	fkb11_mouse ame: full=peptidyl-prolyl cis-trans isomerase fkbp11 short=ppiase fkbp11 ame: full=19 kda fk506-binding protein short=19 kda fkbp short=fkbp-19 ame: full=fk506-binding protein 11 short=fkbp-11 ame: full=rotamase flags: precursor
EMILISO_01322	GEFK01001310	512	169.76	8	btg1_chick ame: full=protein btg1 ame: full=b-cell translocation gene 1 protein
EMILISO_01323	GEFK01001311	505	64.54	3	mus musculus sel-1 suppressor of lin-12-like ( elegans) transcript variant mrna
EMILISO_01324	GEFK01001312	513	127.07	6	---NA---
EMILISO_01325	GEFK01001313	513	84.72	4	k1370_human ame: full=uncharacterized protein kiaa1370
EMILISO_01326	GEFK01001314	505	64.54	3	syf2_gecja ame: full=pre-mrna-splicing factor syf2
EMILISO_01327	GEFK01001315	512	127.32	6	---NA---
EMILISO_01328	GEFK01001316	503	64.8	3	ermp1_human ame: full=endoplasmic reticulum metallopeptidase 1 ame: full=felix-ina
EMILISO_01329	GEFK01001317	512	169.76	8	sec63_ponab ame: full=translocation protein sec63 homolog
EMILISO_01330	GEFK01001318	511	127.57	6	---NA---
EMILISO_01331	GEFK01001319	511	63.79	3	dictyostelium discoideum ax4 ubiquitin domain-containing protein complete cds
EMILISO_01332	GEFK01001320	512	106.1	5	heph_human ame: full=hephaestin flags: precursor
EMILISO_01333	GEFK01001321	512	84.88	4	mrt4_bovin ame: full=mrna turnover protein 4 homolog
EMILISO_01334	GEFK01001322	512	106.1	5	myst3_human ame: full=histone acetyltransferase myst3 short=myst-3 ame: full= ybf2 sas2 and tip60 protein 3 ame: full=monocytic leukemia zinc finger protein ame: full=runt-related transcription factor-binding protein 2 ame: full=zinc finger protein 220
EMILISO_01335	GEFK01001323	511	212.62	10	ttc27_human ame: full=tetratricopeptide repeat protein 27 short=tpr repeat protein 27
EMILISO_01336	GEFK01001324	511	63.79	3	plcb4_bovin ame: full=1-phosphatidylinositol- -bisphosphate phosphodiesterase beta-4 ame: full=pcl-c1 ame: full=phosphoinositide phospholipase c-beta-4 ame: full=phospholipase c-beta-4 short=plc-beta-4
EMILISO_01337	GEFK01001325	511	42.52	2	reverse transcriptase-like protein
EMILISO_01338	GEFK01001326	509	64.04	3	vdac1_rabit ame: full=voltage-dependent anion-selective channel protein 1 short=vdac-1 ame: full=outer mitochondrial membrane protein porin 1
EMILISO_01339	GEFK01001327	510	85.21	4	---NA---
EMILISO_01340	GEFK01001328	511	106.31	5	vp33a_human ame: full=vacuolar protein sorting-associated protein 33a short=hvps33a
EMILISO_01341	GEFK01001329	510	42.61	2	fa63a_bovin ame: full=protein fam63a
EMILISO_01342	GEFK01001330	510	106.52	5	PREDICTED: hypothetical protein LOC100558176 [Anolis carolinensis]
EMILISO_01343	GEFK01001331	510	149.13	7	sae1_rat ame: full=sumo-activating enzyme subunit 1 ame: full=ubiquitin-like 1-activating enzyme e1a
EMILISO_01344	GEFK01001332	508	192.49	9	at2a3_chick ame: full=sarcoplasmic endoplasmic reticulum calcium atpase 3 short= 3 short=serca3 short=sr ca(2+)-atpase 3 ame: full=calcium pump 3
EMILISO_01345	GEFK01001333	508	106.94	5	anolis carolinensis eukaryotic translation initiation factor 4 gamma 1-like miscrna
EMILISO_01346	GEFK01001334	506	42.94	2	bothrops jararaca bradykinin-potentiating c-type natriuretic peptide-related pseudogene complete sequence
EMILISO_01347	GEFK01001335	505	43.03	2	uif_chick ame: full=uap56-interacting factor ame: full=forty-two-three domain-containing protein 1 short=protein 40-2-3
EMILISO_01348	GEFK01001336	508	64.16	3	rhg32_human ame: full=rho gtpase-activating protein 32 ame: full=brain-specific rho gtpase-activating protein ame: full=gab-associated cdc42 rac gtpase-activating protein ame: full=gc-gap
EMILISO_01349	GEFK01001337	507	192.87	9	---NA---
EMILISO_01350	GEFK01001338	500	86.92	4	---NA---
EMILISO_01351	GEFK01001339	508	171.1	8	praf1_pig ame: full=prenylated rab acceptor protein 1 ame: full=pra1 family protein 1
EMILISO_01352	GEFK01001340	508	64.16	3	bombus terrestris gamma-interferon-inducible lysosomal thiol reductase-like mrna
EMILISO_01353	GEFK01001341	509	64.04	3	ahnk_human ame: full=neuroblast differentiation-associated protein ahnak ame: full=desmoyokin
EMILISO_01354	GEFK01001342	508	149.71	7	zinc finger protein 224- partial
EMILISO_01355	GEFK01001343	508	149.71	7	stom_mouse ame: full=erythrocyte band 7 integral membrane protein ame: full=protein ame: full=stomatin
EMILISO_01356	GEFK01001344	508	64.16	3	tpc10_mouse ame: full=trafficking protein particle complex subunit 10 ame: full=trafficking protein particle complex subunit tmem1 ame: full=transport protein particle subunit tmem1 short=trapp subunit tmem1
EMILISO_01357	GEFK01001345	506	128.83	6	crotalus adamanteus serine proteinase 3 complete cds
EMILISO_01358	GEFK01001346	507	278.59	13	rs9_human ame: full=40s ribosomal protein s9
EMILISO_01359	GEFK01001347	509	149.42	7	agkistrodon contortrix clone e33difj02i2nuv microsatellite sequence
EMILISO_01360	GEFK01001348	507	257.16	12	ub2d2_rat ame: full=ubiquitin-conjugating enzyme e2 d2 ame: full=ubiquitin carrier protein d2 ame: full=ubiquitin-conjugating enzyme e2 kb 2 ame: full=ubiquitin-conjugating enzyme e2-17 kda 2 ame: full=ubiquitin-protein ligase d2
EMILISO_01361	GEFK01001349	507	64.29	3	PREDICTED: Anolis carolinensis hypothetical protein LOC100560878 (LOC100560878), mRNA
EMILISO_01362	GEFK01001350	508	128.32	6	syep_human ame: full=bifunctional aminoacyl-trna synthetase ame: full=cell proliferation-inducing gene 32 protein includes: ame: full=glutamyl-trna synthetase ame: full=glutamate--trna ligase short= includes: ame: full=prolyl-trna synthetase ame: full=proline--trna ligase
EMILISO_01363	GEFK01001351	505	64.54	3	---NA---
EMILISO_01364	GEFK01001352	500	43.46	2	---NA---
EMILISO_01365	GEFK01001353	507	85.72	4	copa_human ame: full=coatomer subunit alpha ame: full=alpha-coat protein short=alpha-cop ame: full=hep-cop short=hepcop contains: ame: full=xenin ame: full=xenopsin-related peptide contains: ame: full=proxenin
EMILISO_01366	GEFK01001354	508	64.16	3	pantherophis guttatus hoxc13 complete cds and hoxc12 partial cds
EMILISO_01367	GEFK01001355	507	42.86	2	u520_human ame: full=u5 small nuclear ribonucleoprotein 200 kda helicase ame: full=activating signal cointegrator 1 complex subunit 3-like 1 ame: full=brr2 homolog ame: full=u5 snrnp-specific 200 kda protein short=u5-200kd
EMILISO_01368	GEFK01001356	506	365.02	17	rl18a_rat ame: full=60s ribosomal protein l18a
EMILISO_01369	GEFK01001357	506	128.83	6	arpc3_human ame: full=actin-related protein 2 3 complex subunit 3 ame: full=arp2 3 complex 21 kda subunit short=p21-arc
EMILISO_01370	GEFK01001358	507	64.29	3	---NA---
EMILISO_01371	GEFK01001359	507	128.58	6	---NA---
EMILISO_01372	GEFK01001360	495	87.8	4	gasterosteus aculeatus clone cnb264-e07 mrna sequence
EMILISO_01373	GEFK01001361	506	64.42	3	tox4_ponab ame: full=tox high mobility group box family member 4
EMILISO_01374	GEFK01001362	502	151.5	7	bpnt1_bovin ame: full=3 (2 ) -bisphosphate nucleotidase 1 ame: full=bisphosphate 3 -nucleotidase 1
EMILISO_01375	GEFK01001363	498	43.63	2	---NA---
EMILISO_01376	GEFK01001364	505	129.09	6	---NA---
EMILISO_01377	GEFK01001365	506	107.36	5	---NA---
EMILISO_01378	GEFK01001366	501	130.12	6	---NA---
EMILISO_01379	GEFK01001367	505	365.75	17	rl40_bovin ame: full=ubiquitin-60s ribosomal protein l40 ame: full=ubiquitin a-52 residue ribosomal protein fusion product 1 contains: ame: full=ubiquitin contains: ame: full=60s ribosomal protein l40 ame: full=cep52 flags: precursor
EMILISO_01380	GEFK01001368	506	107.36	5	ogt1_rat ame: full=udp-n-acetylglucosamine--peptide n-acetylglucosaminyltransferase 110 kda subunit ame: full=o- c transferase subunit p110 ame: full=o-linked n-acetylglucosamine transferase 110 kda subunit
EMILISO_01381	GEFK01001369	505	64.54	3	---NA---
EMILISO_01382	GEFK01001370	504	129.34	6	ct011_mouse ame: full=protein c20orf11 homolog ame: full=two hybrid-associated protein 1 with short=twa1
EMILISO_01383	GEFK01001371	487	133.86	6	gallus gallus poly binding cytoplasmic 1 mrna
EMILISO_01384	GEFK01001372	505	107.57	5	ravr1_human ame: full=ribonucleoprotein ptb-binding 1 ame: full=protein raver-1
EMILISO_01385	GEFK01001373	505	64.54	3	tob1_human ame: full=protein tob1 ame: full=transducer of erbb-2 1
EMILISO_01386	GEFK01001374	505	150.6	7	ddx23_human ame: full=probable atp-dependent rna helicase ddx23 ame: full=100 kda u5 snrnp-specific protein ame: full=dead box protein 23 ame: full=prp28 homolog ame: full=u5-100kd
EMILISO_01387	GEFK01001375	501	86.75	4	endonuclease-reverse transcriptase
EMILISO_01388	GEFK01001376	501	130.12	6	plec_crigr ame: full=plectin short=pcn short=pltn ame: full=300 kda intermediate filament-associated protein ame: full=ifap300 ame: full=plectin-1
EMILISO_01389	GEFK01001377	504	86.23	4	---NA---
EMILISO_01390	GEFK01001378	504	64.67	3	ORF2 [Platemys spixii]
EMILISO_01391	GEFK01001379	504	129.34	6	vmha_agkhp ame: full=zinc metalloprotease-disintegrin halysase flags: precursor
EMILISO_01392	GEFK01001380	502	151.5	7	odo1_xenla ame: full=2-oxoglutarate mitochondrial ame: full=2-oxoglutarate dehydrogenase complex component e1 short=ogdc-e1 ame: full=alpha-ketoglutarate dehydrogenase flags: precursor
EMILISO_01393	GEFK01001381	504	129.34	6	canx_chick ame: full=calpain-1 catalytic subunit ame: full=calcium-activated neutral proteinase short=canp ame: full=calpain-1 large subunit ame: full=mu m-type
EMILISO_01394	GEFK01001382	504	237.13	11	sap_chick ame: full=proactivator polypeptide contains: ame: full=saposin-a contains: ame: full=saposin-b contains: ame: full=saposin-c contains: ame: full=saposin-d flags: precursor
EMILISO_01395	GEFK01001383	503	129.6	6	rhg18_human ame: full=rho gtpase-activating protein 18 ame: full= ame: full=rho-type gtpase-activating protein 18
EMILISO_01396	GEFK01001384	505	129.09	6	cp2k1_oncmy ame: full=cytochrome p450 2k1 ame: full=cypiik1 ame: full=cytochrome p450 lmc2
EMILISO_01397	GEFK01001385	494	263.92	12	sycc_chick ame: full=cysteinyl-trna cytoplasmic ame: full=cysteine--trna ligase short=
EMILISO_01398	GEFK01001386	503	43.2	2	pol3_drome ame: full=retrovirus-related pol polyprotein from transposon includes: ame: full=protease includes: ame: full=reverse transcriptase includes: ame: full=endonuclease
EMILISO_01399	GEFK01001387	504	64.67	3	rgp1_bovin ame: full=retrograde golgi transport protein rgp1 homolog
EMILISO_01400	GEFK01001388	500	108.65	5	af018568gloydius ussuriensis capillary permeability-increasing enzyme-2 (cpi-2) complete cds
EMILISO_01401	GEFK01001389	499	108.87	5	---NA---
EMILISO_01402	GEFK01001390	502	86.57	4	abce1_human ame: full=atp-binding cassette sub-family e member 1 ame: full=2 -5 -oligoadenylate-binding protein ame: full= 68 ame: full=rnase l inhibitor ame: full=ribonuclease 4 inhibitor short=rns4i
EMILISO_01403	GEFK01001391	501	65.06	3	anolis carolinensis sparc-like mrna
EMILISO_01404	GEFK01001392	501	108.43	5	chm1a_ponab ame: full=charged multivesicular body protein 1a ame: full=chromatin-modifying protein 1a short=chmp1a
EMILISO_01405	GEFK01001393	496	65.71	3	cul3_rat ame: full=cullin-3
EMILISO_01406	GEFK01001394	502	194.79	9	anolis carolinensis probable e3 ubiquitin-protein ligase trip12-like mrna
EMILISO_01407	GEFK01001395	502	86.57	4	---NA---
EMILISO_01408	GEFK01001396	484	67.34	3	---NA---
EMILISO_01409	GEFK01001397	501	86.75	4	---NA---
EMILISO_01410	GEFK01001398	501	65.06	3	ophiophagus hannah ohanin complete cds
EMILISO_01411	GEFK01001399	502	64.93	3	otud4_human ame: full=otu domain-containing protein 4 ame: full=hiv-1-induced protein hin-1
EMILISO_01412	GEFK01001400	503	151.2	7	fcn2_pig ame: full=ficolin-2 ame: full=collagen fibrinogen domain-containing protein 2 ame: full=ficolin-b ame: full=ficolin-beta ame: full=l-ficolin flags: precursor
EMILISO_01413	GEFK01001401	500	86.92	4	ncoa3_human ame: full=nuclear receptor coactivator 3 short=n -3 ame: full=actr ame: full=amplified in breast cancer 1 protein short=aib-1 ame: full=cbp-interacting protein short=pcip
EMILISO_01414	GEFK01001402	501	43.37	2	naja atra aci gene for chymotrypsin inhibitor exons 1-3
EMILISO_01415	GEFK01001403	497	131.16	6	---NA---
EMILISO_01416	GEFK01001404	501	151.8	7	acinu_human ame: full=apoptotic chromatin condensation inducer in the nucleus short=acinus
EMILISO_01417	GEFK01001405	499	174.19	8	---NA---
EMILISO_01418	GEFK01001406	493	66.11	3	---NA---
EMILISO_01419	GEFK01001407	500	173.84	8	soat1_cerae ame: full=sterol o-acyltransferase 1 ame: full=acyl-coenzyme a:cholesterol acyltransferase 1 short=acat-1 ame: full=cholesterol acyltransferase 1
EMILISO_01420	GEFK01001408	501	520.47	24	rs7_rat ame: full=40s ribosomal protein s7 ame: full=s8
EMILISO_01421	GEFK01001409	500	130.38	6	anr11_human ame: full=ankyrin repeat domain-containing protein 11 ame: full=ankyrin repeat-containing cofactor 1
EMILISO_01422	GEFK01001410	501	130.12	6	erf1_mouse ame: full=eukaryotic peptide chain release factor subunit 1 short=eukaryotic release factor 1 short=erf1
EMILISO_01423	GEFK01001411	502	43.29	2	tigd1_human ame: full=tigger transposable element-derived protein 1
EMILISO_01424	GEFK01001412	497	131.16	6	---NA---
EMILISO_01425	GEFK01001413	498	87.27	4	---NA---
EMILISO_01426	GEFK01001414	500	43.46	2	sc24c_human ame: full=protein transport protein sec24c ame: full=sec24-related protein c
EMILISO_01427	GEFK01001415	500	65.19	3	myo5c_human ame: full=myosin-vc
EMILISO_01428	GEFK01001416	499	174.19	8	uhrf1-binding protein 1-like
EMILISO_01429	GEFK01001417	500	65.19	3	mctp2_human ame: full=multiple c2 and transmembrane domain-containing protein 2
EMILISO_01430	GEFK01001418	501	86.75	4	aspidoscelis hyperythra microsatellite ashy18 sequence
EMILISO_01431	GEFK01001419	499	108.87	5	anolis carolinensis udp-glucose glycoprotein glucosyltransferase 1 mrna
EMILISO_01432	GEFK01001420	498	43.63	2	pesc_danre ame: full=pescadillo
EMILISO_01433	GEFK01001421	499	87.09	4	cisy_iguig ame: full=citrate mitochondrial flags: precursor
EMILISO_01434	GEFK01001422	493	132.23	6	pongo abelii zinc finger protein 33a-like partial mrna
EMILISO_01435	GEFK01001423	498	152.72	7	tgm2_chick ame: full=protein-glutamine gamma-glutamyltransferase 2 ame: full=tissue transglutaminase ame: full=transglutaminase c short=tg short=tgc short=tgase c ame: full=transglutaminase-2 short=tgase-2
EMILISO_01436	GEFK01001424	498	109.08	5	fa73b_xenla ame: full=protein fam73b
EMILISO_01437	GEFK01001425	499	87.09	4	---NA---
EMILISO_01438	GEFK01001426	498	65.45	3	fa84a_human ame: full=protein fam84a ame: full=neurologic sensory protein 1 short=nse1
EMILISO_01439	GEFK01001427	497	153.03	7	---NA---
EMILISO_01440	GEFK01001428	497	65.58	3	---NA---
EMILISO_01441	GEFK01001429	500	65.19	3	---NA---
EMILISO_01442	GEFK01001430	497	87.44	4	ube2b_rat ame: full=ubiquitin-conjugating enzyme e2 b ame: full=rad6 homolog b short=hr6b ame: full=ubiquitin carrier protein b ame: full=ubiquitin-conjugating enzyme e2 ame: full=ubiquitin-protein ligase b
EMILISO_01443	GEFK01001431	492	110.41	5	m4a15_human ame: full=membrane-spanning 4-domains subfamily a member 15
EMILISO_01444	GEFK01001432	498	43.63	2	reverse transcriptase-like protein
EMILISO_01445	GEFK01001433	498	676.32	31	rcas1_canfa ame: full=receptor-binding cancer antigen expressed on o cells ame: full=cancer-associated surface antigen rcas1 ame: full=estrogen receptor-binding fragment-associated gene 9 protein
EMILISO_01446	GEFK01001434	495	109.75	5	orf2-encoded protein
EMILISO_01447	GEFK01001435	497	87.44	4	chd6_human ame: full=chromodomain-helicase-dna-binding protein 6 short=chd-6 ame: full=atp-dependent helicase chd6 ame: full=radiation-induced gene b protein
EMILISO_01448	GEFK01001436	499	65.32	3	---NA---
EMILISO_01449	GEFK01001437	497	218.61	10	tba1d_bovin ame: full=tubulin alpha-1d chain
EMILISO_01450	GEFK01001438	497	371.63	17	ssra_bovin ame: full=translocon-associated protein subunit alpha short=trap-alpha ame: full=signal sequence receptor subunit alpha short=ssr-alpha flags: precursor
EMILISO_01451	GEFK01001439	497	109.3	5	---NA---
EMILISO_01452	GEFK01001440	495	109.75	5	---NA---
EMILISO_01453	GEFK01001441	497	131.16	6	nop14_human ame: full=nucleolar protein 14 ame: full=nucleolar complex protein 14
EMILISO_01454	GEFK01001442	497	65.58	3	---NA---
EMILISO_01455	GEFK01001443	496	65.71	3	---NA---
EMILISO_01456	GEFK01001444	490	288.25	13	palmd_pig ame: full=palmdelphin
EMILISO_01457	GEFK01001445	498	174.54	8	---NA---
EMILISO_01458	GEFK01001446	497	109.3	5	trm44_xenla ame: full=probable trna (uracil-o -)-methyltransferase ame: full=methyltransferase-like protein 19
EMILISO_01459	GEFK01001447	496	65.71	3	agkistrodon contortrix clone e33difj02jd6if microsatellite sequence
EMILISO_01460	GEFK01001448	489	44.44	2	anolis carolinensis tetratricopeptide repeat domain 14 mrna
EMILISO_01461	GEFK01001449	494	219.94	10	gallus gallus bac clone ch261-109d11 from chromosome complete sequence
EMILISO_01462	GEFK01001450	495	263.39	12	nucl_chick ame: full=nucleolin ame: full=protein c23
EMILISO_01463	GEFK01001451	492	66.25	3	p2rx7_rat ame: full=p2x purinoceptor 7 short=p2x7 ame: full=atp receptor ame: full=p2z receptor ame: full=purinergic receptor
EMILISO_01464	GEFK01001452	493	88.15	4	---NA---
EMILISO_01465	GEFK01001453	491	66.38	3	smc3_human ame: full=structural maintenance of chromosomes protein 3 short=smc protein 3 short=smc-3 ame: full=basement membrane-associated chondroitin proteoglycan short=bamacan
EMILISO_01466	GEFK01001454	495	351.19	16	---NA---
EMILISO_01467	GEFK01001455	494	109.97	5	npal2_human ame: full=nipa-like protein 2
EMILISO_01468	GEFK01001456	495	197.54	9	xenopus tropicalis clone ch216- complete sequence
EMILISO_01469	GEFK01001457	495	197.54	9	srsf2_pig ame: full=serine arginine-rich splicing factor 2 ame: full=splicing 35 kda ame: full=splicing factor sc35 short=sc-35 ame: full=splicing arginine serine-rich 2
EMILISO_01470	GEFK01001458	494	153.96	7	akap9_human ame: full=a-kinase anchor protein 9 short=akap-9 ame: full=a-kinase anchor protein 350 kda short=akap 350 short=hgakap 350 ame: full=a-kinase anchor protein 450 kda short=akap 450
EMILISO_01471	GEFK01001459	492	66.25	3	radi_chick ame: full=radixin
EMILISO_01472	GEFK01001460	495	329.24	15	rpn2_bovin ame: full=dolichyl-diphosphooligosaccharide--protein glycosyltransferase subunit 2 ame: full=dolichyl-diphosphooligosaccharide--protein glycosyltransferase 63 kda subunit ame: full=ribophorin ii short=rpn-ii ame: full=ribophorin-2 flags: precursor
EMILISO_01473	GEFK01001461	494	87.97	4	pi4ka_human ame: full=phosphatidylinositol 4-kinase alpha short=pi4-kinase alpha short=pi4k-alpha short= ns-4-kinase alpha
EMILISO_01474	GEFK01001462	489	44.44	2	uhrf1-binding protein 1-like
EMILISO_01475	GEFK01001463	493	66.11	3	pex5_chick ame: full=peroxisomal targeting signal 1 receptor short=pts1 receptor short=pts1r ame: full=pts1-bp ame: full=peroxin-5 ame: full=peroxisomal c-terminal targeting signal import receptor ame: full=peroxisome receptor 1
EMILISO_01476	GEFK01001464	493	418.73	19	pctl_human ame: full=pctp-like protein short=pctp-l ame: full=antigen ny-co-28 ame: full=start domain-containing protein 10 short= 10 ame: full=serologically defined colon cancer antigen 28 ame: full= -related lipid transfer protein 10
EMILISO_01477	GEFK01001465	493	595.03	27	cd034_human ame: full=uncharacterized protein c4orf34
EMILISO_01478	GEFK01001466	489	88.87	4	cadh1_ponab ame: full=cadherin-1 ame: full=epithelial cadherin short=e-cadherin ame: full=uvomorulin ame: cd_antigen=cd324 contains: ame: full=e-cad ctf1 contains: ame: full=e-cad ctf2 contains: ame: full=e-cad ctf3 flags: precursor
EMILISO_01479	GEFK01001467	495	87.8	4	pkn2_rat ame: full=serine threonine-protein kinase n2 ame: full=protease-activated kinase 2 short=pak-2 ame: full=protein kinase c-like 2 ame: full=protein-kinase c-related kinase 2
EMILISO_01480	GEFK01001468	494	43.99	2	anolis carolinensis mitoferrin-2-like partial mrna
EMILISO_01481	GEFK01001469	493	88.15	4	---NA---
EMILISO_01482	GEFK01001470	493	66.11	3	---NA---
EMILISO_01483	GEFK01001471	493	66.11	3	cabin_rat ame: full=calcineurin-binding protein cabin-1 ame: full=calcineurin inhibitor short=cain
EMILISO_01484	GEFK01001472	493	44.08	2	marh6_human ame: full=e3 ubiquitin-protein ligase march6 ame: full=doa10 homolog ame: full=membrane-associated ring finger protein 6 ame: full=membrane-associated ring-ch protein vi short=march-vi ame: full=protein teb-4 ame: full=ring finger protein 176
EMILISO_01485	GEFK01001473	493	132.23	6	if2g_chick ame: full=eukaryotic translation initiation factor 2 subunit 3 ame: full=eukaryotic translation initiation factor 2 subunit gamma short=eif-2-gamma
EMILISO_01486	GEFK01001474	492	44.17	2	yo84_caeel ame: full= uncharacterized transposon-derived protein
EMILISO_01487	GEFK01001475	491	44.26	2	---NA---
EMILISO_01488	GEFK01001476	491	132.77	6	anolis carolinensis septin-7-like mrna
EMILISO_01489	GEFK01001477	488	66.79	3	---NA---
EMILISO_01490	GEFK01001478	491	88.51	4	meleagris gallopavo disintegrin and metalloproteinase domain-containing protein 10-like partial miscrna
EMILISO_01491	GEFK01001479	493	66.11	3	---NA---
EMILISO_01492	GEFK01001480	491	88.51	4	---NA---
EMILISO_01493	GEFK01001481	493	132.23	6	m860_arath ame: full=uncharacterized mitochondrial protein g00860 ame: full=orf158
EMILISO_01494	GEFK01001482	490	110.87	5	---NA---
EMILISO_01495	GEFK01001483	491	88.51	4	---NA---
EMILISO_01496	GEFK01001484	490	133.04	6	---NA---
EMILISO_01497	GEFK01001485	490	44.35	2	rana andersonii clone 507 andersonin-7 peptide complete cds
EMILISO_01498	GEFK01001486	491	88.51	4	---NA---
EMILISO_01499	GEFK01001487	492	154.58	7	preb_human ame: full=prolactin regulatory element-binding protein ame: full=mammalian guanine nucleotide exchange factor msec12
EMILISO_01500	GEFK01001488	491	66.38	3	tera_bovin ame: full=transitional endoplasmic reticulum atpase short=ter atpase ame: full=15s mg(2+)-atpase p97 subunit ame: full=valosin-containing protein short=vcp
EMILISO_01501	GEFK01001489	492	176.66	8	pantherophis guttatus hoxc13 complete cds and hoxc12 partial cds
EMILISO_01510	GEFK01001490	489	66.66	3	gallus gallus prp4 pre-mrna processing factor 4 homolog b mrna
EMILISO_01511	GEFK01001491	491	907.25	41	rl13_human ame: full=60s ribosomal protein l13 ame: full=breast basic conserved protein 1
EMILISO_01512	GEFK01001492	491	177.02	8	entp2_chick ame: full=ectonucleoside triphosphate diphosphohydrolase 2 short=ntpdase 2 ame: full=cd39 antigen-like 1 ame: full=ecto-atp diphosphohydrolase 2 short=ecto-atpdase 2 short=ecto-atpase 2
EMILISO_01513	GEFK01001493	491	154.9	7	galectin 3
EMILISO_01514	GEFK01001494	483	89.98	4	---NA---
EMILISO_01515	GEFK01001495	489	66.66	3	---NA---
EMILISO_01516	GEFK01001496	490	177.38	8	---NA---
EMILISO_01517	GEFK01001497	491	309.79	14	endonuclease-reverse transcriptase
EMILISO_01518	GEFK01001498	490	66.52	3	drysdalia coronoides neurotoxin 513v11 complete cds
EMILISO_01519	GEFK01001499	488	66.79	3	mus musculus actinin alpha 2 mrna
EMILISO_01520	GEFK01001500	489	266.62	12	endonuclease-reverse transcriptase
EMILISO_01521	GEFK01001501	489	88.87	4	pepd_rat ame: full=xaa-pro dipeptidase short=x-pro dipeptidase ame: full=imidodipeptidase ame: full=peptidase d ame: full=proline dipeptidase short=prolidase
EMILISO_01522	GEFK01001502	484	112.24	5	ub2d3_bovin ame: full=ubiquitin-conjugating enzyme e2 d3 ame: full=ubiquitin carrier protein d3 ame: full=ubiquitin-protein ligase d3
EMILISO_01523	GEFK01001503	491	177.02	8	anolis carolinensis endoplasmic reticulum resident protein 44-like mrna
EMILISO_01524	GEFK01001504	487	89.24	4	---NA---
EMILISO_01525	GEFK01001505	488	133.58	6	tm214_human ame: full=transmembrane protein 214
EMILISO_01526	GEFK01001506	487	89.24	4	---NA---
EMILISO_01527	GEFK01001507	487	156.17	7	---NA---
EMILISO_01528	GEFK01001508	489	88.87	4	ma2a2_human ame: full=alpha-mannosidase 2x ame: full=alpha-mannosidase iix short=man iix ame: full=mannosidase alpha class 2a member 2 ame: full=mannosyl-oligosaccharide - -alpha-mannosidase
EMILISO_01529	GEFK01001509	489	88.87	4	---NA---
EMILISO_01530	GEFK01001510	488	66.79	3	---NA---
EMILISO_01531	GEFK01001511	491	44.26	2	naa50_human ame: full=n-alpha-acetyltransferase catalytic subunit ame: full=n-acetyltransferase 13 ame: full=n-acetyltransferase 5 short=hnat5 ame: full=n-acetyltransferase san homolog short=hsan
EMILISO_01532	GEFK01001512	488	66.79	3	pseudonaja textilis class 1b phospholipase a2 pt-pla2 complete cds
EMILISO_01533	GEFK01001513	486	178.84	8	s39aa_human ame: full=zinc transporter zip10 ame: full=solute carrier family 39 member 10 ame: full=zrt- and irt-like protein 10 short=zip-10 flags: precursor
EMILISO_01534	GEFK01001514	488	178.11	8	agkistrodon contortrix clone e33difj02fj2to microsatellite sequence
EMILISO_01535	GEFK01001515	485	134.41	6	---NA---
EMILISO_01536	GEFK01001516	487	111.55	5	goga5_human ame: full=golgin subfamily a member 5 ame: full=cell proliferation-inducing gene 31 protein ame: full=golgin-84 ame: full=protein ret-ii ame: full=ret-fused gene 5 protein
EMILISO_01537	GEFK01001517	488	66.79	3	pan troglodytes formin-like transcript variant 8 mrna
EMILISO_01538	GEFK01001518	484	44.9	2	psmd2_bovin ame: full=26s proteasome non-atpase regulatory subunit 2 ame: full=26s proteasome regulatory subunit rpn1 ame: full=26s proteasome regulatory subunit s2 ame: full=26s proteasome subunit p97 ame: full=tumor necrosis factor type 1 receptor-associated protein 2
EMILISO_01539	GEFK01001519	488	66.79	3	djc11_bovin ame: full= homolog subfamily c member 11
EMILISO_01541	GEFK01001520	486	201.2	9	clic1_human ame: full=chloride intracellular channel protein 1 ame: full=chloride channel abp ame: full=nuclear chloride ion channel 27 short=ncc27 ame: full=regulatory nuclear chloride ion channel protein short=hrncc
EMILISO_01542	GEFK01001521	487	89.24	4	---NA---
EMILISO_01543	GEFK01001522	487	111.55	5	dhe3_human ame: full=glutamate dehydrogenase mitochondrial short=gdh 1 flags: precursor
EMILISO_01544	GEFK01001523	488	111.32	5	---NA---
EMILISO_01545	GEFK01001524	486	156.49	7	agkistrodon contortrix clone e33difj02gvvjs microsatellite sequence
EMILISO_01546	GEFK01001525	486	67.07	3	protein transport protein sec16a- partial
EMILISO_01547	GEFK01001526	486	111.78	5	hsp13_bovin ame: full=heat shock 70 kda protein 13 ame: full=stress-70 protein chaperone microsome-associated 60 kda protein flags: precursor
EMILISO_01548	GEFK01001527	485	89.61	4	elf3_human ame: full=ets-related transcription factor elf-3 ame: full=e74-like factor 3 ame: full=epithelial-restricted with serine box ame: full=epithelium-restricted ets protein esx ame: full=epithelium-specific ets transcription factor 1 short=ese-1
EMILISO_01549	GEFK01001528	487	89.24	4	anolis carolinensis centrobin-like mrna
EMILISO_01550	GEFK01001529	487	133.86	6	smce1_human ame: full=swi snf-related matrix-associated actin-dependent regulator of chromatin subfamily e member 1 ame: full=brg1-associated factor 57 short=baf57
EMILISO_01551	GEFK01001530	486	89.42	4	if2p_rat ame: full=eukaryotic translation initiation factor 5b short=eif-5b ame: full=annexin v-binding protein abp-7 ame: full=translation initiation factor if-2
EMILISO_01552	GEFK01001531	487	111.55	5	tmx2_rat ame: full=thioredoxin-related transmembrane protein 2 ame: full=thioredoxin domain-containing protein 14 flags: precursor
EMILISO_01553	GEFK01001532	486	178.84	8	tiar_human ame: full=nucleolysin tiar ame: full=tia-1-related protein
EMILISO_01554	GEFK01001533	486	89.42	4	af355752_1reverse transcriptase
EMILISO_01555	GEFK01001534	482	67.62	3	tstd2_human ame: full=thiosulfate sulfurtransferase rhodanese-like domain-containing protein 2 ame: full=rhodanese domain-containing protein 2
EMILISO_01556	GEFK01001535	486	67.07	3	prp16_human ame: full=pre-mrna-splicing factor atp-dependent rna helicase prp16 ame: full=atp-dependent rna helicase dhx38 ame: full=deah box protein 38
EMILISO_01557	GEFK01001536	485	89.61	4	ythd1_mouse ame: full=yth domain family protein 1 ame: full=dermatomyositis associated with cancer autoantigen 1 homolog short=daca-1 homolog
EMILISO_01558	GEFK01001537	486	178.84	8	ran_chick ame: full=gtp-binding nuclear protein ran ame: full=gtpase ran ame: full=ras-like protein tc4 ame: full=ras-related nuclear protein
EMILISO_01559	GEFK01001538	486	89.42	4	---NA---
EMILISO_01560	GEFK01001539	486	111.78	5	ck5p3_rat ame: full=cdk5 regulatory subunit-associated protein 3 ame: full=cdk5 activator-binding protein c53
EMILISO_01561	GEFK01001540	483	67.48	3	pcf11_human ame: full=pre-mrna cleavage complex 2 protein pcf11 ame: full=pre-mrna cleavage complex ii protein pcf11
EMILISO_01562	GEFK01001541	482	45.08	2	crotalus adamanteus serine proteinase 3 complete cds
EMILISO_01563	GEFK01001542	487	490.81	22	philodryas olfersii polf0013c snake venom metalloprotease complete cds
EMILISO_01564	GEFK01001543	486	89.42	4	---NA---
EMILISO_01565	GEFK01001544	486	134.13	6	glna_chick ame: full=glutamine synthetase short=gs ame: full=glutamate decarboxylase ame: full=glutamate--ammonia ligase ame: full=p42
EMILISO_01566	GEFK01001545	481	112.94	5	elaphe quadrivirgata mrna for phospholipase a2 complete cds
EMILISO_01567	GEFK01001546	486	67.07	3	---NA---
EMILISO_01568	GEFK01001547	486	89.42	4	---NA---
EMILISO_01569	GEFK01001548	484	134.69	6	dna-dependent protein kinase catalytic subunit
EMILISO_01570	GEFK01001549	485	89.61	4	kap0_chick ame: full=camp-dependent protein kinase type i-alpha regulatory subunit
EMILISO_01571	GEFK01001550	485	89.61	4	---NA---
EMILISO_01572	GEFK01001551	482	157.79	7	hmgb3_mouse ame: full=high mobility group protein b3 ame: full=high mobility group protein 2a short=hmg-2a ame: full=high mobility group protein 4 short=hmg-4
EMILISO_01573	GEFK01001552	483	44.99	2	fnbp4_human ame: full=formin-binding protein 4 ame: full=formin-binding protein 30
EMILISO_01574	GEFK01001553	484	44.9	2	chd2_human ame: full=chromodomain-helicase-dna-binding protein 2 short=chd-2 ame: full=atp-dependent helicase chd2
EMILISO_01575	GEFK01001554	484	67.34	3	rhabdophis tigrinus mitochondrial uncoupling protein a complete cds nuclear gene for mitochondrial product
EMILISO_01576	GEFK01001555	485	89.61	4	sf3b3_human ame: full=splicing factor 3b subunit 3 ame: full=pre-mrna-splicing factor sf3b 130 kda subunit short=sf3b130 ame: full=staf130 ame: full=spliceosome-associated protein 130 short=sap 130
EMILISO_01577	GEFK01001556	484	112.24	5	orf2-encoded protein
EMILISO_01578	GEFK01001557	483	89.98	4	---NA---
EMILISO_01579	GEFK01001558	485	112.01	5	esyt1_ponab ame: full=extended synaptotagmin-1 short=e-syt1
EMILISO_01580	GEFK01001559	483	67.48	3	---NA---
EMILISO_01581	GEFK01001560	484	89.79	4	thamnophis elegans isolate voltage-gated sodium channel exon 20 and partial cds
EMILISO_01582	GEFK01001561	483	67.48	3	agkistrodon contortrix clone e33difj02g5j6s microsatellite sequence
EMILISO_01583	GEFK01001562	484	89.79	4	agkistrodon contortrix clone e33difj02jl8dy microsatellite sequence
EMILISO_01584	GEFK01001563	482	45.08	2	actz_canfa ame: full=alpha-centractin short=centractin ame: full=arp1 ame: full=actin-rpv ame: full=centrosome-associated actin homolog
EMILISO_01585	GEFK01001564	483	67.48	3	agkistrodon contortrix clone e33difj02iww5x microsatellite sequence
EMILISO_01586	GEFK01001565	483	44.99	2	zo3_mouse ame: full=tight junction protein zo-3 ame: full=tight junction protein 3 ame: full=zona occludens protein 3 ame: full=zonula occludens protein 3
EMILISO_01587	GEFK01001566	477	68.33	3	tpsn_human ame: full=tapasin short=tpn short=tpsn ame: full=ngs-17 ame: full=tap-associated protein ame: full=tap-binding protein flags: precursor
EMILISO_01588	GEFK01001567	483	44.99	2	scpdh_ponab ame: full=probable saccharopine dehydrogenase
EMILISO_01589	GEFK01001568	483	157.46	7	nfip1_human ame: full=nedd4 family-interacting protein 1 ame: full=breast cancer-associated protein sga-1m ame: full=nedd4 ww domain-binding protein 5 ame: full= mapk-activating protein pm13 ame: full= nf-kappa-b-activating protein 164 ame: full= nfkb and mapk-activating protein
EMILISO_01590	GEFK01001569	483	44.99	2	bos taurus synaptotagmin cytoplasmic rna interacting transcript variant 2 mrna
EMILISO_01591	GEFK01001570	483	202.45	9	tsn6_mouse ame: full=tetraspanin-6 short=tspan-6 ame: full=transmembrane 4 superfamily member 6
EMILISO_01592	GEFK01001571	481	45.18	2	low quality protein: guanine nucleotide-binding 3-like
EMILISO_01593	GEFK01001572	481	67.76	3	---NA---
EMILISO_01594	GEFK01001573	477	91.11	4	trimeresurus flavoviridis dna for phospholipase a2 complete cds
EMILISO_01595	GEFK01001574	483	67.48	3	anx11_mouse ame: full=annexin a11 ame: full=annexin xi ame: full=annexin-11 ame: full=calcyclin-associated annexin 50 short=cap-50
EMILISO_01596	GEFK01001575	481	67.76	3	vldlr_mouse ame: full=very low-density lipoprotein receptor short=vldl receptor short=vldl-r flags: precursor
EMILISO_01597	GEFK01001576	483	134.97	6	---NA---
EMILISO_01598	GEFK01001577	481	112.94	5	ube2k_bovin ame: full=ubiquitin-conjugating enzyme e2 k ame: full=huntingtin-interacting protein 2 short=hip-2 ame: full=ubiquitin carrier protein ame: full=ubiquitin-conjugating enzyme e2-25 kda short=ubiquitin-conjugating enzyme e2
EMILISO_01599	GEFK01001578	481	135.53	6	lrc59_mouse ame: full=leucine-rich repeat-containing protein 59
EMILISO_01600	GEFK01001579	479	113.41	5	niban_human ame: full=protein niban ame: full=cell growth-inhibiting gene 39 protein ame: full=protein fam129a
EMILISO_01601	GEFK01001580	480	158.45	7	agkistrodon contortrix clone e33difj02fpiag microsatellite sequence
EMILISO_01602	GEFK01001581	482	67.62	3	at2c1_rat ame: full=calcium-transporting atpase type 2c member 1 short=atpase 2c1 ame: full=atp-dependent ca(2+) pump pmr1
EMILISO_01603	GEFK01001582	480	90.54	4	plec_rat ame: full=plectin short=pcn short=pltn ame: full=plectin-1
EMILISO_01604	GEFK01001583	480	158.45	7	psmd8_ponab ame: full=26s proteasome non-atpase regulatory subunit 8 ame: full=26s proteasome regulatory subunit rpn12
EMILISO_01605	GEFK01001584	478	45.46	2	---NA---
EMILISO_01606	GEFK01001585	481	90.35	4	ap1g1_human ame: full=ap-1 complex subunit gamma-1 ame: full=adapter-related protein complex 1 subunit gamma-1 ame: full=adaptor protein complex ap-1 subunit gamma-1 ame: full=clathrin assembly protein complex 1 gamma-1 large chain
EMILISO_01607	GEFK01001586	482	135.25	6	agkistrodon contortrix clone e33difj02fk9jw microsatellite sequence
EMILISO_01608	GEFK01001587	482	67.62	3	---NA---
EMILISO_01609	GEFK01001588	480	67.91	3	cog3_mouse ame: full=conserved oligomeric golgi complex subunit 3 short=cog complex subunit 3 ame: full=component of oligomeric golgi complex 3
EMILISO_01610	GEFK01001589	481	158.12	7	meleagris gallopavo ran-specific gtpase-activating mrna
EMILISO_01611	GEFK01001590	479	113.41	5	homo sapiens tyrosine 3-monooxygenase tryptophan 5-monooxygenase activation zeta polypeptide transcript variant mrna
EMILISO_01612	GEFK01001591	471	138.41	6	philodryas olfersii c-type natriuretic peptide complete cds
EMILISO_01613	GEFK01001592	480	90.54	4	---NA---
EMILISO_01614	GEFK01001593	480	135.81	6	vill_mouse ame: full=villin-like protein ame: full=ef-6
EMILISO_01615	GEFK01001594	481	474.35	21	h33_rat ame: full=histone
EMILISO_01616	GEFK01001595	481	158.12	7	---NA---
EMILISO_01617	GEFK01001596	481	112.94	5	anolis carolinensis meteorin-like mrna
EMILISO_01618	GEFK01001597	480	113.18	5	pp2ab_pig ame: full=serine threonine-protein phosphatase 2a catalytic subunit beta isoform short=pp2a-beta
EMILISO_01619	GEFK01001598	481	90.35	4	kinh_human ame: full=kinesin-1 heavy chain ame: full=conventional kinesin heavy chain ame: full=ubiquitous kinesin heavy chain short=ukhc
EMILISO_01620	GEFK01001599	480	113.18	5	cstn1_human ame: full=calsyntenin-1 ame: full=alcadein-alpha short=alc-alpha ame: full=alzheimer-related cadherin-like protein ame: full=non-classical cadherin xb31alpha contains: ame: full=soluble alc-alpha short=salc-alpha F1933
EMILISO_01621	GEFK01001600	480	90.54	4	---NA---
EMILISO_01622	GEFK01001601	480	67.91	3	homo sapiens poly (adp-ribose) polymerase member 11 mrna
EMILISO_01623	GEFK01001602	480	135.81	6	catd_chick ame: full=cathepsin d contains: ame: full=cathepsin d light chain contains: ame: full=cathepsin d heavy chain flags: precursor
EMILISO_01624	GEFK01001603	480	475.34	21	rs18_rat ame: full=40s ribosomal protein s18
EMILISO_01625	GEFK01001604	478	522.78	23	---NA---
EMILISO_01626	GEFK01001605	476	45.65	2	psa1_chick ame: full=proteasome subunit alpha type-1 ame: full=macropain subunit c2 ame: full=multicatalytic endopeptidase complex subunit c2 ame: full=proteasome component c2
EMILISO_01627	GEFK01001606	478	318.22	14	rl12_rat ame: full=60s ribosomal protein l12
EMILISO_01628	GEFK01001607	480	158.45	7	sar1a_human ame: full=gtp-binding protein sar1a ame: full=copii-associated small gtpase
EMILISO_01629	GEFK01001608	480	226.35	10	serp1_human ame: full=stress-associated endoplasmic reticulum protein 1 ame: full=ribosome-attached membrane protein 4
EMILISO_01630	GEFK01001609	480	135.81	6	6pgd_sheep ame: full=6-phosphogluconate decarboxylating
EMILISO_01631	GEFK01001610	479	340.23	15	rs10_human ame: full=40s ribosomal protein s10
EMILISO_01632	GEFK01001611	479	226.82	10	sng2_human ame: full=synaptogyrin-2 ame: full=cellugyrin
EMILISO_01633	GEFK01001612	476	91.3	4	zinc finger protein 224- partial
EMILISO_01634	GEFK01001613	476	91.3	4	acatn_rat ame: full=acetyl-coenzyme a transporter 1 short=at-1 short=acetyl- transporter 1 ame: full=solute carrier family 33 member 1
EMILISO_01635	GEFK01001614	469	69.5	3	---NA---
EMILISO_01636	GEFK01001615	480	45.27	2	ikka_bovin ame: full=inhibitor of nuclear factor kappa-b kinase subunit alpha short=i-kappa-b kinase alpha short=ikk-a short=ikk-alpha short= ame: full=i-kappa-b kinase 1 short=ikk1 ame: full=nuclear factor nf-kappa-b inhibitor kinase alpha short=nfkbika
EMILISO_01637	GEFK01001616	476	68.48	3	zc3hf_chick ame: full=zinc finger ccch domain-containing protein 15 ame: full=drg family-regulatory protein 1
EMILISO_01638	GEFK01001617	479	68.05	3	lap2a_human ame: full=lamina-associated polypeptide isoform alpha ame: full=thymopoietin isoform alpha short=tp alpha ame: full=thymopoietin-related peptide isoform alpha short=tprp isoform alpha
EMILISO_01639	GEFK01001618	480	67.91	3	---NA---
EMILISO_01640	GEFK01001619	477	68.33	3	pgm2_human ame: full=phosphoglucomutase-2 short=pgm 2 ame: full=glucose phosphomutase 2 ame: full=phosphodeoxyribomutase ame: full=phosphopentomutase
EMILISO_01641	GEFK01001620	479	136.09	6	ist1_bovin ame: full=ist1 homolog
EMILISO_01642	GEFK01001621	474	114.61	5	---NA---
EMILISO_01643	GEFK01001622	478	90.92	4	zinc finger protein 197-like
EMILISO_01644	GEFK01001623	478	68.19	3	mon2_mouse ame: full=protein mon2 homolog ame: full=protein sf21
EMILISO_01645	GEFK01001624	476	68.48	3	---NA---
EMILISO_01646	GEFK01001625	478	90.92	4	tt39a_danre ame: full=tetratricopeptide repeat protein 39a short=tpr repeat protein 39a
EMILISO_01647	GEFK01001626	473	436.43	19	rer1_mouse ame: full=protein rer1
EMILISO_01648	GEFK01001627	474	68.76	3	gallus gallus finished clone 307c18
EMILISO_01649	GEFK01001628	473	68.91	3	---NA---
EMILISO_01650	GEFK01001629	477	91.11	4	saps3_chick ame: full=serine threonine-protein phosphatase 6 regulatory subunit 3 ame: full=saps domain family member 3
EMILISO_01651	GEFK01001630	476	45.65	2	---NA---
EMILISO_01652	GEFK01001631	474	114.61	5	ari1_danre ame: full=e3 ubiquitin-protein ligase arih1 ame: full=protein ariadne-1 homolog short=ari-1
EMILISO_01653	GEFK01001632	473	68.91	3	---NA---
EMILISO_01654	GEFK01001633	477	68.33	3	ubp7_human ame: full=ubiquitin carboxyl-terminal hydrolase 7 ame: full=deubiquitinating enzyme 7 ame: full=herpesvirus-associated ubiquitin-specific protease ame: full=ubiquitin thioesterase 7 ame: full=ubiquitin-specific-processing protease 7
EMILISO_01655	GEFK01001634	476	319.55	14	gdib_mouse ame: full=rab gdp dissociation inhibitor beta short=rab gdi beta ame: full=gdi-3 ame: full=guanosine diphosphate dissociation inhibitor 2 short=gdi-2
EMILISO_01656	GEFK01001635	476	45.65	2	---NA---
EMILISO_01657	GEFK01001636	476	410.85	18	reverse
EMILISO_01658	GEFK01001637	469	46.33	2	---NA---
EMILISO_01659	GEFK01001638	471	92.27	4	myh4_pig ame: full=myosin-4 ame: full=myosin heavy chain 2b short= -2b ame: full=myosin heavy chain 4 ame: full=myosin heavy skeletal fetal
EMILISO_01660	GEFK01001639	475	228.73	10	---NA---
EMILISO_01661	GEFK01001640	475	68.62	3	---NA---
EMILISO_01662	GEFK01001641	473	91.88	4	zbt7a_chick ame: full=zinc finger and btb domain-containing protein 7a ame: full=leukemia lymphoma-related factor short=clrf
EMILISO_01663	GEFK01001642	475	68.62	3	mus musculus riken cdna 5730409e04rik gene transcript variant mrna
EMILISO_01664	GEFK01001643	475	617.58	27	anolis carolinensis hemoglobin subunit beta-1-like mrna
EMILISO_01665	GEFK01001644	474	137.53	6	dictyostelium discoideum ax4 methyltransferase type 12 domain-containing protein complete cds
EMILISO_01666	GEFK01001645	475	22.87	1	---NA---
EMILISO_01667	GEFK01001646	475	91.49	4	ptss1_crigr ame: full=phosphatidylserine synthase 1 short=pss-1 short= er synthase 1 ame: full=serine-exchange enzyme i
EMILISO_01668	GEFK01001647	475	182.99	8	tba2_patvu ame: full=tubulin alpha-2 alpha-4 chain
EMILISO_01669	GEFK01001648	474	68.76	3	cnpy3_mouse ame: full=protein canopy homolog 3 ame: full=protein associated with tlr4 ame: full=trinucleotide repeat-containing gene 5 protein flags: precursor
EMILISO_01670	GEFK01001649	474	45.84	2	ophiophagus hannah l-amino acid oxidase complete cds
EMILISO_01671	GEFK01001650	475	137.24	6	---NA---
EMILISO_01672	GEFK01001651	474	160.45	7	---NA---
EMILISO_01673	GEFK01001652	471	115.34	5	tm87a_human ame: full=transmembrane protein 87a flags: precursor
EMILISO_01674	GEFK01001653	475	182.99	8	gloydius blomhoffi isolate b524 tata box binding protein intron 3
EMILISO_01675	GEFK01001654	475	91.49	4	cyh2_cerae ame: full=cytohesin-2 ame: full= sec7 and coiled-coil domain-containing protein 2
EMILISO_01676	GEFK01001655	472	207.17	9	reverse transcriptase-like protein
EMILISO_01677	GEFK01001656	474	68.76	3	---NA---
EMILISO_01678	GEFK01001657	472	161.13	7	ank3_human ame: full=ankyrin-3 short=ank-3 ame: full=ankyrin-g
EMILISO_01679	GEFK01001658	474	160.45	7	prp19_bovin ame: full=pre-mrna-processing factor 19 ame: full=prp19 pso4 homolog
EMILISO_01680	GEFK01001659	474	68.76	3	---NA---
EMILISO_01681	GEFK01001660	474	91.69	4	tut4_human ame: full=terminal uridylyltransferase 4 short=tutase 4 ame: full=zinc finger cchc domain-containing protein 11
EMILISO_01682	GEFK01001661	474	68.76	3	f105a_mouse ame: full=protein fam105a
EMILISO_01683	GEFK01001662	472	276.22	12	kcy_mouse ame: full=ump-cmp kinase ame: full=cytidine monophosphate kinase ame: full=cytidylate kinase ame: full=deoxycytidylate kinase ame: full=uridine monophosphate kinase ame: full=uridine monophosphate cytidine monophosphate kinase short=ump cmp kinase short=ump cmpk
EMILISO_01684	GEFK01001663	474	114.61	5	echa_rat ame: full=trifunctional enzyme subunit mitochondrial ame: full=tp-alpha includes: ame: full=long-chain enoyl- hydratase includes: ame: full=long chain 3-hydroxyacyl- dehydrogenase flags: precursor
EMILISO_01685	GEFK01001664	473	91.88	4	ippk_human ame: full=inositol-pentakisphosphate 2-kinase ame: full=ipk1 homolog ame: full=inositol- -pentakisphosphate 2-kinase ame: full=ins( )p5 2-kinase short= 5 2-kinase
EMILISO_01686	GEFK01001665	470	92.47	4	---NA---
EMILISO_01687	GEFK01001666	473	114.85	5	wdr1_rat ame: full=wd repeat-containing protein 1
EMILISO_01688	GEFK01001667	471	322.95	14	catl_sarpe ame: full=cathepsin l contains: ame: full=cathepsin l heavy chain contains: ame: full=cathepsin l light chain flags: precursor
EMILISO_01689	GEFK01001668	471	115.34	5	sc6a4_cavpo ame: full=sodium-dependent serotonin transporter ame: full=5ht transporter short=5htt ame: full=solute carrier family 6 member 4
EMILISO_01690	GEFK01001669	467	139.59	6	---NA---
EMILISO_01691	GEFK01001670	472	69.06	3	gak8_human ame: full=herv- provirus ancestral gag polyprotein short=gag polyprotein ame: full=herv-k gag protein contains: ame: full=matrix protein contains: ame: full=capsid protein contains: ame: full=nucleocapsid protein
EMILISO_01692	GEFK01001671	472	161.13	7	rab14_mouse ame: full=ras-related protein rab-14
EMILISO_01693	GEFK01001672	471	69.2	3	abr_bovin ame: full=active breakpoint cluster region-related protein
EMILISO_01694	GEFK01001673	464	46.83	2	xenopus tropicalis finished clone tegg114n09
EMILISO_01695	GEFK01001674	469	92.66	4	nudc_chick ame: full=nuclear migration protein nudc ame: full=nuclear distribution protein c homolog
EMILISO_01696	GEFK01001675	467	69.8	3	gima4_rat ame: full=gtpase imap family member 4 ame: full=immunity-associated nucleotide 1 protein short=ian-1 ame: full=immunity-associated protein 4
EMILISO_01697	GEFK01001676	470	161.82	7	gallus gallus cdna sequence bc005537 mrna
EMILISO_01698	GEFK01001677	471	92.27	4	akib1_human ame: full=ankyrin repeat and ibr domain-containing protein 1
EMILISO_01699	GEFK01001678	467	116.33	5	---NA---
EMILISO_01700	GEFK01001679	467	69.8	3	kinh_human ame: full=kinesin-1 heavy chain ame: full=conventional kinesin heavy chain ame: full=ubiquitous kinesin heavy chain short=ukhc
EMILISO_01701	GEFK01001680	466	93.26	4	adcy9_human ame: full=adenylate cyclase type 9 ame: full=atp pyrophosphate-lyase 9 ame: full=adenylate cyclase type ix ame: full=adenylyl cyclase 9
EMILISO_01702	GEFK01001681	470	161.82	7	---NA---
EMILISO_01703	GEFK01001682	471	69.2	3	snf2-related cbp activator protein
EMILISO_01704	GEFK01001683	463	70.4	3	ap2a2_human ame: full=ap-2 complex subunit alpha-2 ame: full=100 kda coated vesicle protein c ame: full=adapter-related protein complex 2 alpha-2 subunit ame: full=adaptor protein complex ap-2 subunit alpha-2
EMILISO_01705	GEFK01001684	469	162.16	7	ell2_mouse ame: full=rna polymerase ii elongation factor ell2
EMILISO_01706	GEFK01001685	467	116.33	5	madd_human ame: full=map kinase-activating death domain protein ame: full=differentially expressed in normal and neoplastic cells ame: full=insulinoma glucagonoma clone 20 ame: full=rab3 gdp gtp exchange factor
EMILISO_01707	GEFK01001686	469	185.33	8	rhoa_bovin ame: full=transforming protein ame: full=gb ame: full=p21 flags: precursor
EMILISO_01708	GEFK01001687	467	93.06	4	psmd1_chick ame: full=26s proteasome non-atpase regulatory subunit 1 ame: full=26s proteasome regulatory subunit rpn2 ame: full=26s proteasome regulatory subunit s1
EMILISO_01709	GEFK01001688	470	346.75	15	arf3_rat ame: full=adp-ribosylation factor 3 ame: full=liver regeneration-related protein lrrg202
EMILISO_01710	GEFK01001689	468	116.08	5	grk6_human ame: full=g protein-coupled receptor kinase 6 ame: full=g protein-coupled receptor kinase grk6
EMILISO_01711	GEFK01001690	470	69.35	3	cdk16_human ame: full=cyclin-dependent kinase 16 ame: full=cell division protein kinase 16 ame: full=pctaire-motif protein kinase 1 ame: full=serine threonine-protein kinase pctaire-1
EMILISO_01712	GEFK01001691	471	69.2	3	al3a1_canfa ame: full=aldehyde dimeric nadp-preferring ame: full=aldhiii ame: full=aldehyde dehydrogenase 3 ame: full=aldehyde dehydrogenase family 3 member a1
EMILISO_01713	GEFK01001692	467	69.8	3	---NA---
EMILISO_01714	GEFK01001693	467	116.33	5	salmo salar clone bac chori214-109f19 complete sequence
EMILISO_01715	GEFK01001694	470	69.35	3	---NA---
EMILISO_01716	GEFK01001695	470	69.35	3	symc_xenla ame: full=methionyl-trna cytoplasmic ame: full=methionine--trna ligase short=
EMILISO_01717	GEFK01001696	469	162.16	7	ctbp1_rat ame: full=c-terminal-binding protein 1 short= 1 ame: full=50 kda bfa-dependent adp-ribosylation substrate ame: full=bars-50 ame: full=c-terminal-binding protein 3 short= 3
EMILISO_01718	GEFK01001697	466	93.26	4	crotalus durissus terrificus gyroxin like b1_7 serine protease precursor complete cds
EMILISO_01719	GEFK01001698	468	92.86	4	ce110_human ame: full=centriolin ame: full=centrosomal protein 1 ame: full=centrosomal protein of 110 kda short=cep110
EMILISO_01720	GEFK01001699	467	116.33	5	2aaa_human ame: full=serine threonine-protein phosphatase 2a 65 kda regulatory subunit a alpha isoform ame: full=medium tumor antigen-associated 61 kda protein ame: full=pp2a subunit a isoform pr65-alpha ame: full=pp2a subunit a isoform r1-alpha
EMILISO_01721	GEFK01001700	476	296.73	13	copz1_human ame: full=coatomer subunit zeta-1 ame: full=zeta-1-coat protein short=zeta-1 cop
EMILISO_01722	GEFK01001701	465	140.19	6	rhabdophis tigrinus mitochondrial uncoupling protein a complete cds nuclear gene for mitochondrial product
EMILISO_01723	GEFK01001702	464	70.25	3	phosphotidylinositol phosphatase ptprq-like
EMILISO_01724	GEFK01001703	469	139	6	---NA---
EMILISO_01725	GEFK01001704	469	162.16	7	ReO_6 [Oryzias latipes]
EMILISO_01726	GEFK01001705	463	46.93	2	kprb_bovin ame: full=phosphoribosyl pyrophosphate synthase-associated protein 2 short=prpp synthase-associated protein 2
EMILISO_01727	GEFK01001706	469	46.33	2	myh9_chick ame: full=myosin-9 ame: full=cellular myosin heavy type a ame: full=myosin heavy chain 9 ame: full=myosin heavy non-muscle iia ame: full=non-muscle myosin heavy chain a short=nmmhc-a ame: full=non-muscle myosin heavy chain iia short=nmmhc ii-a short=nmmhc-iia
EMILISO_01728	GEFK01001707	468	92.86	4	---NA---
EMILISO_01729	GEFK01001708	468	92.86	4	srp54_rat ame: full=signal recognition particle 54 kda protein short=srp54
EMILISO_01730	GEFK01001709	468	162.51	7	oxyuranus scutellatus scutellatus clone r62 golgi-associated protein partial cds
EMILISO_01731	GEFK01001710	466	116.58	5	philodryas olfersii c-type natriuretic peptide complete cds
EMILISO_01732	GEFK01001711	468	46.43	2	madd_human ame: full=map kinase-activating death domain protein ame: full=differentially expressed in normal and neoplastic cells ame: full=insulinoma glucagonoma clone 20 ame: full=rab3 gdp gtp exchange factor
EMILISO_01733	GEFK01001712	468	69.65	3	cdk9_chick ame: full=cyclin-dependent kinase 9 ame: full=cell division protein kinase 9
EMILISO_01734	GEFK01001713	467	69.8	3	---NA---
EMILISO_01735	GEFK01001714	466	163.21	7	---NA---
EMILISO_01736	GEFK01001715	467	116.33	5	---NA---
EMILISO_01737	GEFK01001716	467	93.06	4	ttyh3_xenla ame: full=protein tweety homolog 3
EMILISO_01738	GEFK01001717	464	117.08	5	ophiophagus hannah ohanin complete cds
EMILISO_01739	GEFK01001718	465	233.65	10	---NA---
EMILISO_01740	GEFK01001719	466	23.32	1	---NA---
EMILISO_01741	GEFK01001720	467	139.59	6	med18_bovin ame: full=mediator of rna polymerase ii transcription subunit 18 ame: full=mediator complex subunit 18
EMILISO_01742	GEFK01001721	466	93.26	4	tcpb_bovin ame: full=t-complex protein 1 subunit beta short=tcp-1-beta ame: full=cct-beta
EMILISO_01743	GEFK01001722	466	69.95	3	---NA---
EMILISO_01744	GEFK01001723	459	94.68	4	pantherophis guttatus hoxc13 complete cds and hoxc12 partial cds
EMILISO_01745	GEFK01001724	466	256.47	11	aldob_chick ame: full=fructose-bisphosphate aldolase b ame: full=liver-type aldolase
EMILISO_01747	GEFK01001725	465	163.56	7	nfib_bovin ame: full=nuclear factor 1 b-type short=nf1-b short=nuclear factor 1 b ame: full=nuclear factor i b short=nf-i b short=nfi-b
EMILISO_01748	GEFK01001726	464	93.66	4	adcy8_human ame: full=adenylate cyclase type 8 ame: full=atp pyrophosphate-lyase 8 ame: full=adenylate cyclase type viii ame: full=adenylyl cyclase 8 ame: full=ca(2+) calmodulin-activated adenylyl cyclase
EMILISO_01749	GEFK01001727	463	164.26	7	---NA---
EMILISO_01750	GEFK01001728	465	70.1	3	---NA---
EMILISO_01751	GEFK01001729	461	47.14	2	---NA---
EMILISO_01752	GEFK01001730	465	116.83	5	---NA---
EMILISO_01753	GEFK01001731	463	117.33	5	ctnb1_human ame: full=catenin beta-1 ame: full=beta-catenin
EMILISO_01754	GEFK01001732	463	70.4	3	vp13c_mouse ame: full=vacuolar protein sorting-associated protein 13c
EMILISO_01755	GEFK01001733	461	164.98	7	psmd3_mouse ame: full=26s proteasome non-atpase regulatory subunit 3 ame: full=26s proteasome regulatory subunit rpn3 ame: full=26s proteasome regulatory subunit s3 ame: full=proteasome subunit p58 ame: full=transplantation antigen p91a ame: full=tum-p91a antigen
EMILISO_01756	GEFK01001734	464	163.91	7	---NA---
EMILISO_01757	GEFK01001735	464	163.91	7	kctd1_human ame: full=btb poz domain-containing protein kctd1 ame: full=potassium channel tetramerization domain-containing protein 1
EMILISO_01758	GEFK01001736	463	187.73	8	nltp_chick ame: full=non-specific lipid-transfer protein short=nsl-tp ame: full=propanoyl- c-acyltransferase ame: full=scp-chi ame: full=scpx ame: full=sterol carrier protein 2 short=scp-2 ame: full=sterol carrier protein x short=scp-x
EMILISO_01759	GEFK01001737	458	71.17	3	---NA---
EMILISO_01760	GEFK01001738	460	118.1	5	dhi1b_xenla ame: full=hydroxysteroid 11-beta-dehydrogenase 1-like protein b ame: full=11-beta-hydroxysteroid dehydrogenase type 3-b short=11-dh3-b short=11-beta-hsd3-b flags: precursor
EMILISO_01761	GEFK01001739	461	47.14	2	---NA---
EMILISO_01762	GEFK01001740	461	117.84	5	austrelaps labialis kunitz-type proteinase inhibitor complete cds
EMILISO_01763	GEFK01001741	461	94.27	4	---NA---
EMILISO_01764	GEFK01001742	463	140.8	6	glcm_mouse ame: full=glucosylceramidase ame: full=acid beta-glucosidase ame: full=beta-glucocerebrosidase ame: full=d-glucosyl-n-acylsphingosine glucohydrolase flags: precursor
EMILISO_01765	GEFK01001743	462	94.07	4	cap1_bovin ame: full=adenylyl cyclase-associated protein 1 short=cap 1
EMILISO_01766	GEFK01001744	461	117.84	5	cndp2_rat ame: full=cytosolic non-specific dipeptidase ame: full=cndp dipeptidase 2
EMILISO_01767	GEFK01001745	458	308.39	13	---NA---
EMILISO_01768	GEFK01001746	461	141.41	6	PREDICTED: similar to hCG2039029 [Taeniopygia guttata]
EMILISO_01769	GEFK01001747	456	95.31	4	cmc1_human ame: full=calcium-binding mitochondrial carrier protein aralar1 ame: full=mitochondrial aspartate glutamate carrier 1 ame: full=solute carrier family 25 member 12
EMILISO_01770	GEFK01001748	461	47.14	2	titin_human ame: full=titin ame: full=connectin ame: full=rhabdomyosarcoma antigen mu-rms-
EMILISO_01771	GEFK01001749	460	70.86	3	---NA---
EMILISO_01772	GEFK01001750	460	23.62	1	---NA---
EMILISO_01773	GEFK01001751	457	166.42	7	---NA---
EMILISO_01774	GEFK01001752	459	47.34	2	pi4p2_human ame: full= phosphatidylinositol 4-kinase alpha-like protein p2
EMILISO_01775	GEFK01001753	461	117.84	5	hif1a_chick ame: full=hypoxia-inducible factor 1-alpha short=hif-1-alpha short=hif1-alpha
EMILISO_01776	GEFK01001754	459	94.68	4	---NA---
EMILISO_01777	GEFK01001755	456	214.44	9	agkistrodon contortrix clone e33difj02fpiag microsatellite sequence
EMILISO_01778	GEFK01001756	457	380.39	16	wap3_phiol ame: full=waprin-phi3 flags: precursor
EMILISO_01779	GEFK01001757	457	71.32	3	serine threonine-protein kinase wnk3-like
EMILISO_01780	GEFK01001758	456	95.31	4	brd7_chick ame: full=bromodomain-containing protein 7
EMILISO_01781	GEFK01001759	458	166.06	7	---NA---
EMILISO_01782	GEFK01001760	456	71.48	3	sus scrofa dcn1-like protein 1-like mrna
EMILISO_01783	GEFK01001761	458	94.89	4	gallus gallus serine arginine-rich splicing factor 2 mrna
EMILISO_01784	GEFK01001762	459	94.68	4	sc6a9_bovin ame: full=sodium- and chloride-dependent glycine transporter 1 short= -1 short= 1 ame: full=solute carrier family 6 member 9
EMILISO_01785	GEFK01001763	458	118.61	5	anolis carolinensis pituitary homeobox 2- transcript variant 2 mrna
EMILISO_01786	GEFK01001764	443	73.58	3	endonuclease-reverse transcriptase
EMILISO_01787	GEFK01001765	457	47.55	2	---NA---
EMILISO_01788	GEFK01001766	457	237.74	10	mbd1 protein
EMILISO_01789	GEFK01001767	459	142.02	6	bungarus multicinctus clone b132_1g_2 three-finger toxin partial cds
EMILISO_01790	GEFK01001768	450	24.14	1	lin1_nycco ame: full=line-1 reverse transcriptase homolog
EMILISO_01791	GEFK01001769	457	332.84	14	---NA---
EMILISO_01792	GEFK01001770	454	215.38	9	c2c4c_human ame: full=c2 calcium-dependent domain-containing protein 4c ame: full=nuclear-localized factor 3 ame: full=protein fam148c
EMILISO_01793	GEFK01001771	457	71.32	3	---NA---
EMILISO_01794	GEFK01001772	456	142.96	6	pdia6_rat ame: full=protein disulfide-isomerase a6 ame: full=calcium-binding protein 1 short= 1 ame: full=protein disulfide isomerase p5 ame: full=thioredoxin domain-containing protein 7 flags: precursor
EMILISO_01795	GEFK01001773	455	286.54	12	at5g3_bovin ame: full=atp synthase lipid-binding mitochondrial ame: full=atp synthase proteolipid p3 ame: full=atpase protein 9 ame: full=atpase subunit c flags: precursor
EMILISO_01796	GEFK01001774	454	239.31	10	abcf1_human ame: full=atp-binding cassette sub-family f member 1 ame: full=atp-binding cassette 50 ame: full=tnf-alpha-stimulated abc protein
EMILISO_01797	GEFK01001775	450	72.43	3	dop2_human ame: full=protein dopey-2
EMILISO_01798	GEFK01001776	456	166.78	7	anolis carolinensis ccaat enhancer-binding protein zeta-like mrna
EMILISO_01799	GEFK01001777	452	72.11	3	nosip_xentr ame: full=nitric oxide synthase-interacting protein
EMILISO_01800	GEFK01001778	451	144.54	6	---NA---
EMILISO_01801	GEFK01001779	454	287.18	12	---NA---
EMILISO_01802	GEFK01001780	453	47.97	2	rm28_human ame: full=39s ribosomal protein mitochondrial short=l28mt short=mrp-l28 ame: full=melanoma antigen p15 ame: full=melanoma-associated antigen recognized by t lymphocytes flags: precursor
EMILISO_01803	GEFK01001781	447	97.22	4	---NA---
EMILISO_01804	GEFK01001782	454	167.52	7	tm9s2_mouse ame: full=transmembrane 9 superfamily member 2 flags: precursor
EMILISO_01805	GEFK01001783	452	288.45	12	a-kinase anchor protein mitochondrial- partial
EMILISO_01806	GEFK01001784	449	169.38	7	psb4_xenla ame: full=proteasome subunit beta type-4 short=proteasome beta chain ame: full=macropain beta chain ame: full=multicatalytic endopeptidase complex beta chain ame: full=proteasome chain 3 flags: precursor
EMILISO_01807	GEFK01001785	452	96.15	4	---NA---
EMILISO_01808	GEFK01001786	452	336.52	14	rs15_bovin ame: full=40s ribosomal protein s15
EMILISO_01809	GEFK01001787	460	401.53	17	aftin_human ame: full=aftiphilin
EMILISO_01810	GEFK01001788	451	48.18	2	cg043_mouse ame: full=uncharacterized protein c7orf43 homolog
EMILISO_01811	GEFK01001789	447	170.14	7	---NA---
EMILISO_01812	GEFK01001790	453	119.92	5	tusc3_human ame: full=tumor suppressor candidate 3 ame: full=protein n33
EMILISO_01813	GEFK01001791	451	168.63	7	---NA---
EMILISO_01814	GEFK01001792	451	48.18	2	syfa_danre ame: full=phenylalanyl-trna synthetase alpha chain ame: full=phenylalanine--trna ligase alpha chain short=
EMILISO_01815	GEFK01001793	451	96.36	4	tbc17_human ame: full=tbc1 domain family member 17
EMILISO_01816	GEFK01001794	450	144.86	6	snd1_rat ame: full=staphylococcal nuclease domain-containing protein 1 ame: full=100 kda coactivator ame: full=snd p102 ame: full=p100 co-activator ame: full=p105 coactivator
EMILISO_01817	GEFK01001795	451	120.45	5	snai2_human ame: full=zinc finger protein snai2 ame: full=neural crest transcription factor slug ame: full=protein snail homolog 2
EMILISO_01818	GEFK01001796	447	145.84	6	psmd2_bovin ame: full=26s proteasome non-atpase regulatory subunit 2 ame: full=26s proteasome regulatory subunit rpn1 ame: full=26s proteasome regulatory subunit s2 ame: full=26s proteasome subunit p97 ame: full=tumor necrosis factor type 1 receptor-associated protein 2
EMILISO_01819	GEFK01001797	450	48.29	2	pantherophis guttatus hoxc13 complete cds and hoxc12 partial cds
EMILISO_01820	GEFK01001798	450	169.01	7	kc1a_rat ame: full=casein kinase i isoform alpha short=cki-alpha ame: full=ck1
EMILISO_01821	GEFK01001799	449	120.99	5	hsp70_chick ame: full=heat shock 70 kda protein short=hsp70
EMILISO_01822	GEFK01001800	444	97.88	4	hnrdl_chick ame: full=heterogeneous nuclear ribonucleoprotein d-like short=hnrnp d-like short=hnrnp dl
EMILISO_01823	GEFK01001801	450	458.74	19	---NA---
EMILISO_01824	GEFK01001802	449	72.59	3	crotalus adamanteus serine proteinase 9 partial cds
EMILISO_01825	GEFK01001803	449	387.17	16	anolis carolinensis protein kish-b-like mrna
EMILISO_01826	GEFK01001804	446	48.72	2	---NA---
EMILISO_01827	GEFK01001805	445	97.66	4	af097001naja sputatrix post synaptic alpha neurotoxin precursor ntx-4 complete cds
EMILISO_01828	GEFK01001806	446	97.44	4	---NA---
EMILISO_01829	GEFK01001807	447	97.22	4	---NA---
EMILISO_01830	GEFK01001808	448	48.5	2	---NA---
EMILISO_01831	GEFK01001809	447	72.92	3	---NA---
EMILISO_01832	GEFK01001810	447	121.53	5	pantherophis guttatus hoxd13 hoxd11 and hoxd10 complete cds
EMILISO_01833	GEFK01001811	446	219.25	9	---NA---
EMILISO_01834	GEFK01001812	444	97.88	4	macf1_rat ame: full=microtubule-actin cross-linking factor 1 ame: full=actin cross-linking family 7
EMILISO_01835	GEFK01001813	444	73.41	3	taeniopygia guttata nuclear receptor subfamily group member 2 mrna
EMILISO_01836	GEFK01001814	446	146.16	6	chd9_mouse ame: full=chromodomain-helicase-dna-binding protein 9 short=chd-9 ame: full=atp-dependent helicase chd9 ame: full=ppar-alpha-interacting complex protein 320 kda ame: full=peroxisomal proliferator-activated receptor a-interacting complex 320 kda protein
EMILISO_01837	GEFK01001815	444	122.35	5	---NA---
EMILISO_01838	GEFK01001816	440	98.77	4	po22_popja ame: full=retrovirus-related pol polyprotein from type-1 retrotransposable element r2 ame: full=retrovirus-related pol polyprotein from type i retrotransposable element r2 includes: ame: full=reverse transcriptase includes: ame: full=endonuclease
EMILISO_01839	GEFK01001817	446	73.08	3	calm_rat ame: full=calmodulin short=
EMILISO_01840	GEFK01001818	444	146.82	6	tom70_human ame: full=mitochondrial import receptor subunit tom70 ame: full=mitochondrial precursor proteins import receptor ame: full=translocase of outer membrane 70 kda subunit
EMILISO_01841	GEFK01001819	443	98.1	4	---NA---
EMILISO_01842	GEFK01001820	441	714.47	29	rs12_chick ame: full=40s ribosomal protein s12
EMILISO_01843	GEFK01001821	439	148.49	6	tc1a_caeel ame: full=transposable element tc1 transposase
EMILISO_01844	GEFK01001822	440	197.54	8	---NA---
EMILISO_01845	GEFK01001823	439	346.49	14	reverse transcriptase-like protein
EMILISO_01846	GEFK01001824	439	148.49	6	osbl5_mouse ame: full=oxysterol-binding protein 5 short=orp-5 short=osbp-related protein 5 ame: full=oxysterol-binding protein homolog 1
EMILISO_01847	GEFK01001825	434	125.17	5	sjchgc04878 protein
EMILISO_01848	GEFK01001826	434	275.38	11	nec1_human ame: full=neuroendocrine convertase 1 short=nec 1 ame: full=prohormone convertase 1 ame: full=proprotein convertase 1 short=pc1 flags: precursor
EMILISO_01849	GEFK01001827	432	704.2	28	wap1_liopo ame: full=waprin-lio1 flags: precursor
EMILISO_01850	GEFK01001828	428	76.16	3	dna-dependent protein kinase catalytic subunit
EMILISO_01851	GEFK01001829	428	304.62	12	iqec1_mouse ame: full=iq motif and sec7 domain-containing protein 1
EMILISO_01852	GEFK01001830	428	152.31	6	---NA---
EMILISO_01853	GEFK01001831	438	49.61	2	polx_tobac ame: full=retrovirus-related pol polyprotein from transposon tnt 1-94 includes: ame: full=protease includes: ame: full=reverse transcriptase includes: ame: full=endonuclease
EMILISO_01854	GEFK01001832	427	152.67	6	---NA---
EMILISO_01855	GEFK01001833	427	229	9	---NA---
EMILISO_01856	GEFK01001834	426	255.04	10	pantherophis guttatus hoxc13 complete cds and hoxc12 partial cds
EMILISO_01857	GEFK01001835	426	127.52	5	conserved hypothetical protein [Streptomyces sp. C]
EMILISO_01858	GEFK01001836	424	102.5	4	laticauda semifasciata pla2 gene for phospholipase promoter clone: 2gl16-1
EMILISO_01859	GEFK01001837	424	179.37	7	monodelphis domestica sterol regulatory element binding transcription factor 1 mrna
EMILISO_01860	GEFK01001838	416	78.35	3	agkistrodon contortrix clone e33difj02i8hrz microsatellite sequence
EMILISO_01861	GEFK01001839	419	414.89	16	frih_chick ame: full=ferritin heavy chain short=ferritin h subunit
EMILISO_01862	GEFK01001840	419	155.58	6	pgk_chick ame: full=phosphoglycerate kinase
EMILISO_01863	GEFK01001841	411	237.92	9	bungarus multicinctus pilp-1 gene for protease inhibitor-like protein exons 1-3
EMILISO_01864	GEFK01001842	408	292.92	11	plasmodium falciparum 3d7 myb-like dna-binding complete cds
EMILISO_01865	GEFK01001843	404	53.79	2	naja sputatrix neutral phospholipase a2 complete cds
EMILISO_01866	GEFK01001844	404	161.36	6	---NA---
EMILISO_01867	GEFK01001845	399	245.07	9	---NA---
EMILISO_01868	GEFK01001846	395	192.54	7	---NA---
EMILISO_01869	GEFK01001847	384	226.35	8	rfxk_human ame: full=dna-binding protein rfxank ame: full=ankyrin repeat family a protein 1 ame: full=regulatory factor x subunit b short=rfx-b ame: full=regulatory factor x-associated ankyrin-containing protein
EMILISO_01870	GEFK01001848	392	166.3	6	---NA---
EMILISO_01871	GEFK01001849	383	198.57	7	rm13_bovin ame: full=39s ribosomal protein mitochondrial short=l13mt short=mrp-l13
EMILISO_01872	GEFK01001850	384	141.47	5	mus musculus riken cdna d930048n14 mrna (cdna clone image:30549860) partial cds
EMILISO_01873	GEFK01001851	383	198.57	7	cab39_human ame: full=calcium-binding protein 39 ame: full=protein mo25
EMILISO_01874	GEFK01001852	374	348.6	12	botryotinia fuckeliana protein partial mrna
EMILISO_01875	GEFK01001853	374	116.2	4	crotalus adamanteus serine proteinase 3 complete cds
EMILISO_01876	GEFK01001854	326	1633.06	49	---NA---
EMILISO_01877	GEFK01001855	303	502.01	14	mus musculus phosphatase and actin regulator 1 transcript variant mrna
EMILISO_01878	GEFK01001856	298	437.51	12	bombus terrestris nicastrin-like mrna
EMILISO_01879	GEFK01001857	273	557.17	14	---NA---
EMILISO_01880	GEFK01001858	259	41.95	1	---NA---
EMILISO_01882	GEFK01001860	249	130.9	3	oryza sativa japonica group cdna clone: full insert sequence
EMILISO_01883	GEFK01001861	233	279.78	6	danio rerio signal cub egf-like mrna (cdna clone image:7427863) partial cds
EMILISO_01884	GEFK01001862	220	345.7	7	---NA---
EMILISO_01885	GEFK01001863	214	1218.49	24	---NA---
EMILREF_MMP1a	GEFK01001928	2.109	22250	4319	Matrix metalloproteinase-9; Short=MMP-9; AltName: Full=92 kDa gelatinase; AltName: Full=92 kDa type IV collagenase; AltName: Full=Gelatinase B
EMILREF_MMP1b	GEFK01001929	2.109	25490.3	4948	Matrix metalloproteinase-9; Short=MMP-9; AltName: Full=92 kDa gelatinase; AltName: Full=92 kDa type IV collagenase; AltName: Full=Gelatinase B
EMILREF_MMP1c	GEFK01001930	2.109	406.98	79	Matrix metalloproteinase-9; Short=MMP-9; AltName: Full=92 kDa gelatinase; AltName: Full=92 kDa type IV collagenase; AltName: Full=Gelatinase B
EMILREF_MMP1d	GEFK01001931	2.109	94635.8	18370	Matrix metalloproteinase-9; Short=MMP-9; AltName: Full=92 kDa gelatinase; AltName: Full=92 kDa type IV collagenase; AltName: Full=Gelatinase B
EMILREF_MMP2a	GEFK01001932	1.939	59776.2	10668	Matrix metalloproteinase-9; Short=MMP-9; AltName: Full=92 kDa gelatinase; AltName: Full=92 kDa type IV collagenase; AltName: Full=Gelatinase B
EMILREF_MMP3a	GEFK01001933	1.533	20602.8	2907	Matrix metalloproteinase-9; Short=MMP-9; AltName: Full=92 kDa gelatinase; AltName: Full=92 kDa type IV collagenase; AltName: Full=Gelatinase B
EMILREF_MMP4a	GEFK01001934	1.301	45497	5448	Collagenase 3; AltName: Full=Matrix metalloproteinase-13; Short=MMP-13; Flags: Precursor
EMILREF_MMP4b	GEFK01001935	1.301	114619	13725	Collagenase 3; AltName: Full=Matrix metalloproteinase-13; Short=MMP-13; Flags: Precursor

## Sheet: O guibei
Seq. Name	Accession	Length	RPKM	Reads	Description
OGUICON_00003	GEFL01001457	1017	1391.07	119	reverse transcriptase-like protein
OGUICON_00009	GEFL01001456	867	1083.25	79	---NA---
OGUICON_00016	GEFL01001455	1035	930.39	81	---NA---
OGUICON_00017	GEFL01001454	518	895.07	39	disks large homolog 1-like
OGUICON_00018	GEFL01001453	1053	1264.48	112	---NA---
OGUICON_00021	GEFL01001452	742	785.08	49	nucleoside diphosphate kinase
OGUICON_00025	GEFL01001451	718	430.5	26	---NA---
OGUICON_00026	GEFL01001450	1757	236.82	35	rna-directed dna polymerase from mobile element jockey-like
OGUICON_00029	GEFL01001449	635	786.32	42	---NA---
OGUICON_00033	GEFL01001448	1067	947.06	85	---NA---
OGUICON_00036	GEFL01001447	2038	1032.5	177	reverse partial
OGUICON_00038	GEFL01001446	644	756.87	41	---NA---
OGUICON_00043	GEFL01001445	1015	304.53	26	---NA---
OGUICON_00051	GEFL01001444	3855	305.3	99	25-hydroxycholesterol 7-alpha-hydroxylase-like
OGUICON_00053	GEFL01001443	1141	458.45	44	vomeronasal type-2 receptor 1-like
OGUICON_00056	GEFL01001442	524	952.89	42	vomeronasal type-2 receptor 1-like
OGUICON_00059	GEFL01001441	2152	784.46	142	---NA---
OGUICON_00063	GEFL01001440	1267	403.47	43	---NA---
OGUICON_00072	GEFL01001439	1182	1599.2	159	---NA---
OGUICON_00073	GEFL01001438	1532	85.36	11	sequestosome 1
OGUICON_00075	GEFL01001437	551	107.88	5	sequestosome-1 isoform 1
OGUICON_00078	GEFL01001436	664	519.22	29	---NA---
OGUICON_00080	GEFL01001435	940	392.06	31	---NA---
OGUICON_00092	GEFL01001434	2747	783.33	181	---NA---
OGUICON_00094	GEFL01001433	1439	264.37	32	---NA---
OGUICON_00098	GEFL01001432	1427	266.59	32	---NA---
OGUICON_00109	GEFL01001431	850	489.52	35	---NA---
OGUICON_00113	GEFL01001430	1047	806.18	71	---NA---
OGUICON_00119	GEFL01001429	755	535.37	34	---NA---
OGUICON_00129	GEFL01001428	1773	241.39	36	---NA---
OGUICON_00144	GEFL01001427	679	1925.95	110	---NA---
OGUICON_00146	GEFL01001426	528	720.51	32	---NA---
OGUICON_00180	GEFL01001425	845	98.48	7	---NA---
OGUICON_00199	GEFL01001424	712	734.67	44	---NA---
OGUICON_00221	GEFL01001423	528	90.06	4	---NA---
OGUICON_00286	GEFL01001422	1075	962.13	87	---NA---
OGUICON_00294	GEFL01001421	623	5553	291	---NA---
OGUICON_00300	GEFL01001420	566	420.08	20	---NA---
OGUICON_00305	GEFL01001419	766	807.04	52	---NA---
OGUICON_00312	GEFL01001418	681	645.92	37	lipocalin
OGUICON_00402	GEFL01001417	1307	654.91	72	---NA---
OGUICON_00485	GEFL01001416	1008	342.03	29	rna-directed dna polymerase from mobile element jockey-like
OGUICON_00520	GEFL01001415	503	661.78	28	---NA---
OGUICON_00576	GEFL01001414	513	324.44	14	---NA---
OGUICON_00789	GEFL01001413	1273	102.73	11	---NA---
OGUICON_01286	GEFL01001412	685	41531.2	2393	senescence-associated protein
OGUICON_01287	GEFL01001411	2420	29642.3	6034	rrna promoter binding protein
OGUIISO_00001	GEFL01001410	2308	499.64	97	snake venom metalloprotease
OGUIISO_00002	GEFL01001409	2308	1813.13	352	snake venom metalloprotease
OGUIISO_00003	GEFL01001408	2307	412.25	80	snake venom metalloprotease
OGUIISO_00004	GEFL01001407	2307	51.53	10	snake venom metalloprotease
OGUIISO_00005	GEFL01001406	2295	414.41	80	snake venom metalloprotease
OGUIISO_00006	GEFL01001405	2295	82.88	16	snake venom metalloprotease
OGUIISO_00007	GEFL01001404	2217	187.68	35	snake venom metalloprotease
OGUIISO_00008	GEFL01001403	2216	262.87	49	snake venom metalloprotease
OGUIISO_00009	GEFL01001402	2204	253.52	47	snake venom metalloprotease
OGUIISO_00010	GEFL01001401	2216	64.38	12	snake venom metalloprotease
OGUIISO_00011	GEFL01001400	2215	413.28	77	snake venom metalloprotease
OGUIISO_00012	GEFL01001399	2203	124.12	23	snake venom metalloprotease
OGUIISO_00013	GEFL01001398	2065	472.08	82	snake venom metalloprotease
OGUIISO_00014	GEFL01001397	2064	161.28	28	snake venom metalloprotease
OGUIISO_00015	GEFL01001396	2052	196.98	34	snake venom metalloprotease
OGUIISO_00016	GEFL01001395	1534	534.74	69	snake venom metalloprotease
OGUIISO_00017	GEFL01001394	771	15.42	1	snake venom metalloprotease
OGUIISO_00018	GEFL01001393	770	200.71	13	snake venom metalloprotease
OGUIISO_00019	GEFL01001392	758	203.89	13	snake venom metalloprotease
OGUIISO_00020	GEFL01001391	4129	958.79	333	bactericidal permeability-increasing 3
OGUIISO_00021	GEFL01001390	4072	645.22	221	bactericidal permeability-increasing 3
OGUIISO_00022	GEFL01001389	3915	1032.45	340	reverse transcriptase-like protein
OGUIISO_00023	GEFL01001388	3858	751.88	244	reverse transcriptase-like protein
OGUIISO_00024	GEFL01001387	2561	2752.76	593	bactericidal permeability-increasing 3
OGUIISO_00025	GEFL01001386	2211	8436.39	1569	bactericidal permeability-increasing 3
OGUIISO_00026	GEFL01001385	1997	654.84	110	rna-directed dna polymerase from mobile element jockey-like
OGUIISO_00027	GEFL01001384	1122	339.06	32	bactericidal permeability-increasing 3
OGUIISO_00028	GEFL01001383	608	136.87	7	bactericidal permeability-increasing 3
OGUIISO_00029	GEFL01001382	2239	376.99	71	zinc finger protein 492
OGUIISO_00030	GEFL01001381	1531	302.84	39	zinc finger protein 492
OGUIISO_00031	GEFL01001380	1509	141.81	18	zinc finger protein 492
OGUIISO_00032	GEFL01001379	1438	99.21	12	zinc finger protein 167-like
OGUIISO_00033	GEFL01001378	555	42.84	2	zinc finger protein 167-like
OGUIISO_00034	GEFL01001377	4279	30.56	11	rna-directed dna polymerase from mobile element jockey-like
OGUIISO_00035	GEFL01001376	3838	157.97	51	rna-directed dna polymerase from mobile element jockey-like
OGUIISO_00036	GEFL01001375	3187	507.32	136	rna-directed dna polymerase from mobile element jockey-like
OGUIISO_00037	GEFL01001374	2158	176.29	32	---NA---
OGUIISO_00038	GEFL01001373	2079	228.73	40	---NA---
OGUIISO_00039	GEFL01001372	1717	484.67	70	---NA---
OGUIISO_00040	GEFL01001371	1638	522.57	72	---NA---
OGUIISO_00041	GEFL01001370	1066	1115.23	100	---NA---
OGUIISO_00042	GEFL01001369	987	1361.08	113	---NA---
OGUIISO_00043	GEFL01001368	311	229.36	6	---NA---
OGUIISO_00044	GEFL01001367	2401	24.76	5	snake venom metalloprotease
OGUIISO_00045	GEFL01001366	2282	31.26	6	snake venom metalloprotease
OGUIISO_00046	GEFL01001365	2312	35.99	7	vm3_najat ame: full=zinc metalloproteinase-disintegrin ame: full=snake venom metalloproteinase short=svmp flags: precursor
OGUIISO_00047	GEFL01001364	2193	43.37	8	vm3_najat ame: full=zinc metalloproteinase-disintegrin ame: full=snake venom metalloproteinase short=svmp flags: precursor
OGUIISO_00048	GEFL01001363	1966	24.19	4	snake venom metalloprotease
OGUIISO_00049	GEFL01001362	1847	45.06	7	snake venom metalloprotease
OGUIISO_00050	GEFL01001361	1744	13.63	2	snake venom metalloprotease
OGUIISO_00051	GEFL01001360	1655	71.83	10	vm3_najat ame: full=zinc metalloproteinase-disintegrin ame: full=snake venom metalloproteinase short=svmp flags: precursor
OGUIISO_00052	GEFL01001359	1442	49.47	6	snake venom metalloprotease
OGUIISO_00053	GEFL01001358	1309	27.25	3	snake venom metalloprotease
OGUIISO_00054	GEFL01001357	1007	94.45	8	vm3_najat ame: full=zinc metalloproteinase-disintegrin ame: full=snake venom metalloproteinase short=svmp flags: precursor
OGUIISO_00055	GEFL01001356	662	161.62	9	metalloproteinase
OGUIISO_00056	GEFL01001355	1949	176.89	29	---NA---
OGUIISO_00057	GEFL01001354	1454	6222.18	761	---NA---
OGUIISO_00058	GEFL01001353	1399	1113.21	131	---NA---
OGUIISO_00059	GEFL01001352	5268	124.12	55	rna-directed dna polymerase from mobile element jockey-like
OGUIISO_00060	GEFL01001351	5265	140	62	rna-directed dna polymerase from mobile element jockey-like
OGUIISO_00061	GEFL01001350	4710	128.73	51	cholinesterase-like
OGUIISO_00062	GEFL01001349	4707	159.12	63	rna-directed dna polymerase from mobile element jockey-like
OGUIISO_00063	GEFL01001348	3143	242.08	64	cholinesterase-like
OGUIISO_00064	GEFL01001347	3141	200.6	53	cholinesterase-like
OGUIISO_00065	GEFL01001346	3063	675.34	174	cholinesterase-like
OGUIISO_00066	GEFL01001345	3060	338	87	cholinesterase-like
OGUIISO_00067	GEFL01001344	2826	113.58	27	rna-directed dna polymerase from mobile element jockey-like
OGUIISO_00068	GEFL01001343	2268	152.01	29	rna-directed dna polymerase from mobile element jockey-like
OGUIISO_00069	GEFL01001342	702	67.74	4	---NA---
OGUIISO_00070	GEFL01001341	621	153.15	8	rna-directed dna polymerase from mobile element jockey-like
OGUIISO_00071	GEFL01001340	3224	626.87	170	protein phosphatase
OGUIISO_00072	GEFL01001339	1910	2551.95	410	protein phosphatase
OGUIISO_00073	GEFL01001338	1871	31.77	5	protein phosphatase
OGUIISO_00074	GEFL01001337	1662	228.9	32	protein phosphatase
OGUIISO_00075	GEFL01001336	1728	158.24	23	retinol dehydrogenase 16-like
OGUIISO_00076	GEFL01001335	1682	120.16	17	retroelement pol poly
OGUIISO_00077	GEFL01001334	1664	7.14	1	retinol dehydrogenase 16-like
OGUIISO_00078	GEFL01001333	1482	0	0	copia-type partial
OGUIISO_00079	GEFL01001332	1418	41.92	5	copia-type partial
OGUIISO_00080	GEFL01001331	762	78.01	5	---NA---
OGUIISO_00081	GEFL01001330	698	0	0	---NA---
OGUIISO_00082	GEFL01001329	1106	75.24	7	---NA---
OGUIISO_00083	GEFL01001328	1059	348.01	31	---NA---
OGUIISO_00084	GEFL01001327	1064	55.87	5	predicted protein
OGUIISO_00085	GEFL01001326	1040	57.16	5	predicted protein
OGUIISO_00086	GEFL01001325	1045	91.01	8	predicted protein
OGUIISO_00087	GEFL01001324	1025	46.39	4	predicted protein
OGUIISO_00088	GEFL01001323	1006	59.09	5	predicted protein
OGUIISO_00089	GEFL01001322	1622	7.33	1	---NA---
OGUIISO_00090	GEFL01001321	1612	7.37	1	---NA---
OGUIISO_00091	GEFL01001320	1598	81.83	11	---NA---
OGUIISO_00092	GEFL01001319	713	50.02	3	---NA---
OGUIISO_00093	GEFL01001318	703	16.91	1	---NA---
OGUIISO_00094	GEFL01001317	689	0	0	---NA---
OGUIISO_00095	GEFL01001316	516	46.08	2	---NA---
OGUIISO_00096	GEFL01001315	506	0	0	---NA---
OGUIISO_00097	GEFL01001314	492	96.65	4	---NA---
OGUIISO_00098	GEFL01001313	1495	31.81	4	solute carrier family member 1
OGUIISO_00099	GEFL01001312	1241	47.9	5	large neutral amino acids transporter small subunit 3
OGUIISO_00100	GEFL01001311	897	66.27	5	large neutral amino acids transporter small subunit 3
OGUIISO_00101	GEFL01001310	747	79.57	5	large neutral amino acids transporter small subunit 3-like
OGUIISO_00102	GEFL01001309	643	36.98	2	large neutral amino acids transporter small subunit 3
OGUIISO_00103	GEFL01001308	3558	1085.93	325	deleted in malignant brain tumors 1
OGUIISO_00104	GEFL01001307	3558	1159.43	347	deleted in malignant brain tumors 1
OGUIISO_00105	GEFL01001306	3245	1351.87	369	deleted in malignant brain tumors 1 protein
OGUIISO_00106	GEFL01001305	3245	1117.4	305	deleted in malignant brain tumors 1 protein
OGUIISO_00107	GEFL01001304	3854	92.54	30	solute carrier family 12 member 2
OGUIISO_00108	GEFL01001303	3786	135.02	43	solute carrier family 12 member 2
OGUIISO_00109	GEFL01001302	1239	95.95	10	ficolin-1 precursor
OGUIISO_00110	GEFL01001301	1222	48.64	5	ficolin-1 precursor
OGUIISO_00111	GEFL01001300	1202	0	0	ficolin-1 precursor
OGUIISO_00112	GEFL01001299	1185	80.26	8	ficolin-2 precursor
OGUIISO_00113	GEFL01001298	1219	136.54	14	adp-ribosylation factor 1
OGUIISO_00114	GEFL01001297	1181	0	0	adp-ribosylation factor 1
OGUIISO_00115	GEFL01001296	930	12.78	1	adp-ribosylation factor 1
OGUIISO_00116	GEFL01001295	892	53.31	4	adp-ribosylation factor 1
OGUIISO_00117	GEFL01001294	962	10838	877	---NA---
OGUIISO_00118	GEFL01001293	974	3490.84	286	---NA---
OGUIISO_00119	GEFL01001292	802	163.06	11	---NA---
OGUIISO_00120	GEFL01001291	814	14.6	1	---NA---
OGUIISO_00121	GEFL01001290	564	0	0	---NA---
OGUIISO_00122	GEFL01001289	540	66.05	3	---NA---
OGUIISO_00123	GEFL01001288	538	44.19	2	---NA---
OGUIISO_00124	GEFL01001287	514	0	0	---NA---
OGUIISO_00125	GEFL01001286	937	20135.4	1587	---NA---
OGUIISO_00126	GEFL01001285	937	3704.81	292	---NA---
OGUIISO_00127	GEFL01001284	960	136.22	11	---NA---
OGUIISO_00128	GEFL01001283	921	23260.4	1802	---NA---
OGUIISO_00129	GEFL01001282	896	132.68	10	---NA---
OGUIISO_00130	GEFL01001281	553	494.45	23	---NA---
OGUIISO_00131	GEFL01001280	476	374.63	15	---NA---
OGUIISO_00132	GEFL01001279	2509	75.81	16	rna-directed dna polymerase from mobile element jockey-like
OGUIISO_00133	GEFL01001278	2176	109.27	20	tpa: endonuclease-reverse transcriptase
OGUIISO_00134	GEFL01001277	1262	122.46	13	rna-directed dna polymerase from mobile element jockey-like
OGUIISO_00135	GEFL01001276	929	51.19	4	tpa: endonuclease-reverse transcriptase
OGUIISO_00136	GEFL01001275	1271	93.54	10	poly -binding protein 2 isoform 1
OGUIISO_00137	GEFL01001274	1232	96.5	10	poly -binding protein 2 isoform 1
OGUIISO_00138	GEFL01001273	1142	52.05	5	poly -binding protein 2 isoform 2
OGUIISO_00139	GEFL01001272	1103	75.45	7	poly -binding protein 2 isoform 2
OGUIISO_00140	GEFL01001271	2396	1235.48	249	snake venom metalloprotease
OGUIISO_00141	GEFL01001270	2367	472.12	94	snake venom metalloprotease
OGUIISO_00142	GEFL01001269	885	188.06	14	snake venom metalloprotease
OGUIISO_00143	GEFL01001268	1522	140.6	18	mhc class i antigen
OGUIISO_00144	GEFL01001267	1500	87.18	11	mhc class i antigen
OGUIISO_00145	GEFL01001266	1479	72.34	9	mhc class i antigen
OGUIISO_00146	GEFL01001265	1329	143.13	16	---NA---
OGUIISO_00147	GEFL01001264	1009	82.48	7	---NA---
OGUIISO_00148	GEFL01001263	501	94.92	4	---NA---
OGUIISO_00149	GEFL01001262	878	94.78	7	heme oxygenase 2
OGUIISO_00150	GEFL01001261	688	51.84	3	heme oxygenase 2
OGUIISO_00151	GEFL01001260	533	111.52	5	heme oxygenase 2
OGUIISO_00152	GEFL01001259	448	53.07	2	---NA---
OGUIISO_00153	GEFL01001258	395	662.14	22	ubiquitin c
OGUIISO_00154	GEFL01001257	261	455.49	10	b chain structure of ovarian tumor domain in complex with ubiquitin
OGUIISO_00155	GEFL01001256	1050	79.26	7	serine arginine-rich splicing factor 2
OGUIISO_00156	GEFL01001255	807	29.46	2	serine arginine-rich splicing factor 2
OGUIISO_00157	GEFL01001254	405	88.06	3	---NA---
OGUIISO_00158	GEFL01001253	758	47.05	3	pith domain-containing protein 1
OGUIISO_00159	GEFL01001252	583	20.39	1	pith domain-containing protein 1
OGUIISO_00160	GEFL01001251	463	51.35	2	---NA---
OGUIISO_00161	GEFL01001250	841	98.95	7	unnamed protein product
OGUIISO_00162	GEFL01001249	472	75.56	3	sfrs11 partial
OGUIISO_00163	GEFL01001248	411	0	0	sfrs11 partial
OGUIISO_00164	GEFL01001247	3162	127.83	34	complement c3-like
OGUIISO_00165	GEFL01001246	3162	109.03	29	complement c3-like
OGUIISO_00166	GEFL01001245	2523	179.06	38	---NA---
OGUIISO_00167	GEFL01001244	2506	180.27	38	---NA---
OGUIISO_00168	GEFL01001243	1466	137.86	17	claudin-15
OGUIISO_00169	GEFL01001242	1303	63.87	7	claudin-15
OGUIISO_00170	GEFL01001241	1081	87.98	8	---NA---
OGUIISO_00171	GEFL01001240	1074	99.62	9	---NA---
OGUIISO_00172	GEFL01001239	900	132.09	10	calcium and integrin-binding protein 1
OGUIISO_00173	GEFL01001238	899	171.91	13	calcium and integrin-binding protein 1
OGUIISO_00174	GEFL01001237	770	123.52	8	immunoglobulin lambda light chain
OGUIISO_00175	GEFL01001236	767	62	4	immunoglobulin lambda light chain
OGUIISO_00176	GEFL01001235	648	495.35	27	---NA---
OGUIISO_00177	GEFL01001234	654	1036.14	57	---NA---
OGUIISO_00178	GEFL01001233	1065	3036.28	272	fibrinogen-binding protein
OGUIISO_00179	GEFL01001232	4991	154.83	65	retrotransposon ty1-copia subclass
OGUIISO_00180	GEFL01001231	4778	144.31	58	retrotransposon ty1-copia subclass
OGUIISO_00181	GEFL01001230	4275	222.47	80	endonuclease reverse transcriptase
OGUIISO_00182	GEFL01001229	4186	457.25	161	endonuclease reverse transcriptase
OGUIISO_00183	GEFL01001228	2895	201.22	49	rna-directed dna polymerase from mobile element jockey-like
OGUIISO_00184	GEFL01001227	1869	197.19	31	rna-directed dna polymerase from mobile element jockey-like
OGUIISO_00185	GEFL01001226	2323	112.59	22	golgi integral membrane protein 4
OGUIISO_00186	GEFL01001225	2294	62.19	12	golgi integral membrane protein 4
OGUIISO_00187	GEFL01001224	2215	101.98	19	programmed cell death 4 (neoplastic transformation inhibitor)
OGUIISO_00188	GEFL01001223	2187	103.28	19	programmed cell death 4 (neoplastic transformation inhibitor)
OGUIISO_00189	GEFL01001222	2124	61.57	11	udp-n-acetylglucosamine--peptide n-acetylglucosaminyltransferase 110 kda subunit
OGUIISO_00190	GEFL01001221	1958	97.15	16	udp-n-acetylglucosamine--peptide n-acetylglucosaminyltransferase 110 kda subunit
OGUIISO_00191	GEFL01001220	2001	582.24	98	adp atp translocase 2
OGUIISO_00192	GEFL01001219	1994	250.41	42	adp atp translocase 3
OGUIISO_00193	GEFL01001218	2433	635.22	130	galectin-4
OGUIISO_00194	GEFL01001217	1539	100.42	13	galectin-4
OGUIISO_00195	GEFL01001216	2280	583.99	112	snake venom metalloprotease
OGUIISO_00196	GEFL01001215	1255	123.15	13	snake venom metalloprotease
OGUIISO_00197	GEFL01001214	2086	165.27	29	reverse transcriptase-like protein
OGUIISO_00198	GEFL01001213	1413	67.31	8	reverse transcriptase-like protein
OGUIISO_00199	GEFL01001212	1894	276.18	44	hypothetical protein G5I_07730
OGUIISO_00200	GEFL01001211	1397	85.1	10	---NA---
OGUIISO_00201	GEFL01001210	1540	100.36	13	hsp90 co-chaperone cpr7 cyclophilin
OGUIISO_00202	GEFL01001209	1348	97.01	11	natural killer tumor recognition isoform cra_d
OGUIISO_00203	GEFL01001208	1787	133.05	20	tyrosine 3-monooxygenase tryptophan 5-monooxygenase activation theta polypeptide
OGUIISO_00204	GEFL01001207	1072	44.36	4	---NA---
OGUIISO_00205	GEFL01001206	1739	191.42	28	probable atp-dependent rna helicase ddx5
OGUIISO_00206	GEFL01001205	1087	43.75	4	probable atp-dependent rna helicase ddx5 isoform 2
OGUIISO_00207	GEFL01001204	1464	4328.21	533	crvp_phiol ame: full=cysteine-rich secretory protein ame: full=crisp-phi1 ame: full=crisp-phi2 flags: precursor
OGUIISO_00208	GEFL01001203	1237	317.15	33	crvp_phiol ame: full=cysteine-rich secretory protein ame: full=crisp-phi1 ame: full=crisp-phi2 flags: precursor
OGUIISO_00209	GEFL01001202	1373	493.55	57	line-1 type transposase domain-containing protein 1-like
OGUIISO_00210	GEFL01001201	1325	107.67	12	PREDICTED: hypothetical protein LOC100563288
OGUIISO_00211	GEFL01001200	1969	138.87	23	eukaryotic translation initiation factor 5
OGUIISO_00212	GEFL01001199	721	32.98	2	eukaryotic translation initiation factor 5
OGUIISO_00213	GEFL01001198	1553	145.45	19	---NA---
OGUIISO_00214	GEFL01001197	1114	7203.46	675	---NA---
OGUIISO_00215	GEFL01001196	1309	54.49	6	rna binding motif protein 10
OGUIISO_00216	GEFL01001195	1269	65.58	7	rna-binding protein 10 isoform 1
OGUIISO_00217	GEFL01001194	1818	568.92	87	---NA---
OGUIISO_00218	GEFL01001193	593	80.19	4	---NA---
OGUIISO_00219	GEFL01001192	1585	172.51	23	spike glycoprotein precursor
OGUIISO_00220	GEFL01001191	797	119.33	8	---NA---
OGUIISO_00221	GEFL01001190	1293	45.97	5	queuine trna-ribosyltransferase
OGUIISO_00222	GEFL01001189	997	47.7	4	queuine trna-ribosyltransferase
OGUIISO_00223	GEFL01001188	1309	26238	2889	---NA---
OGUIISO_00224	GEFL01001187	864	55.04	4	---NA---
OGUIISO_00225	GEFL01001186	1829	188.5	29	---NA---
OGUIISO_00226	GEFL01001185	312	76.21	2	---NA---
OGUIISO_00227	GEFL01001184	1348	114.65	13	---NA---
OGUIISO_00228	GEFL01001183	765	31.08	2	---NA---
OGUIISO_00229	GEFL01001182	1315	207.93	23	rna-binding protein 3
OGUIISO_00230	GEFL01001181	778	61.12	4	rna-binding protein 3
OGUIISO_00231	GEFL01001180	1356	105.21	12	aldehyde mitochondrial isoform 2
OGUIISO_00232	GEFL01001179	691	51.61	3	mitochondrial aldehyde dehydrogenase partial
OGUIISO_00233	GEFL01001178	1016	105.31	9	galectin-3
OGUIISO_00234	GEFL01001177	995	95.58	8	galectin-3
OGUIISO_00235	GEFL01001176	1070	44.44	4	torsin family member b (torsin b)
OGUIISO_00236	GEFL01001175	934	63.64	5	torsin-1b
OGUIISO_00237	GEFL01001174	1152	196.08	19	choline kinase alpha
OGUIISO_00238	GEFL01001173	803	29.61	2	choline kinase alpha
OGUIISO_00239	GEFL01001172	1001	59.38	5	basic leucine zipper and w2 domain-containing protein 1 isoform 2
OGUIISO_00240	GEFL01001171	911	52.2	4	basic leucine zipper and w2 domain-containing protein 1 isoform 1
OGUIISO_00241	GEFL01001170	1001	190.02	16	elongation factor 1-delta isoform 1
OGUIISO_00242	GEFL01001169	896	318.44	24	elongation factor 1-delta-like isoform 2
OGUIISO_00243	GEFL01001168	1103	118.56	11	tropomyosin alpha-4 chain
OGUIISO_00244	GEFL01001167	780	30.48	2	tropomyosin alpha-3 chain
OGUIISO_00245	GEFL01001166	1046	193.21	17	lysosomal acid lipase cholesteryl ester hydrolase precursor
OGUIISO_00246	GEFL01001165	827	43.13	3	lysosomal acid lipase cholesteryl ester hydrolase-like
OGUIISO_00247	GEFL01001164	932	89.29	7	---NA---
OGUIISO_00248	GEFL01001163	913	104.17	8	---NA---
OGUIISO_00249	GEFL01001162	1264	141.08	15	influenza virus ns1a-binding protein homolog
OGUIISO_00250	GEFL01001161	560	84.92	4	influenza virus ns1a-binding protein homolog isoform 2
OGUIISO_00251	GEFL01001160	1116	170.44	16	rna-directed dna polymerase from mobile element jockey-like
OGUIISO_00252	GEFL01001159	706	67.36	4	rna-directed dna polymerase from mobile element jockey-like
OGUIISO_00253	GEFL01001158	957	37.27	3	rna-binding protein 39
OGUIISO_00254	GEFL01001157	809	58.78	4	rna binding motif protein 39 isoform a
OGUIISO_00255	GEFL01001156	999	23.8	2	---NA---
OGUIISO_00256	GEFL01001155	747	63.66	4	---NA---
OGUIISO_00257	GEFL01001154	875	40.76	3	low quality protein: mucin-5b-like
OGUIISO_00258	GEFL01001153	777	168.3	11	mucin-5b
OGUIISO_00259	GEFL01001152	828	57.43	4	plasminogen activator inhibitor 1 rna-binding protein isoform 1
OGUIISO_00260	GEFL01001151	804	29.57	2	plasminogen activator inhibitor 1 rna-binding protein isoform 1
OGUIISO_00261	GEFL01001150	1089	98.25	9	retroelement pol polyprotein
OGUIISO_00262	GEFL01001149	538	44.19	2	retroelement pol polyprotein
OGUIISO_00263	GEFL01001148	1071	88.8	8	high mobility group protein b3-like
OGUIISO_00264	GEFL01001147	538	44.19	2	---NA---
OGUIISO_00265	GEFL01001146	911	65.25	5	inositol hexaphosphate kinase 2
OGUIISO_00266	GEFL01001145	698	102.19	6	---NA---
OGUIISO_00267	GEFL01001144	872	40.9	3	collagen alpha-1 chain-like
OGUIISO_00268	GEFL01001143	696	51.24	3	collagen alpha-1 chain-like
OGUIISO_00269	GEFL01001142	892	39.98	3	---NA---
OGUIISO_00270	GEFL01001141	671	35.43	2	mitochondrial import receptor subunit tom5 homolog
OGUIISO_00271	GEFL01001140	791	495.98	33	serum amyloid p-component-like
OGUIISO_00272	GEFL01001139	773	538.28	35	serum amyloid p-component-like
OGUIISO_00273	GEFL01001138	867	205.68	15	---NA---
OGUIISO_00274	GEFL01001137	686	51.99	3	f-box wd repeat-containing protein 4-like
OGUIISO_00275	GEFL01001136	844	1309.97	93	venom c-type lectin mannose binding isoform 3
OGUIISO_00276	GEFL01001135	677	140.48	8	cleca_phiol ame: full=c-type lectin subunit a flags: precursor
OGUIISO_00277	GEFL01001134	758	94.1	6	coiled-coil-helix-coiled-coil-helix domain-containing protein mitochondrial-like
OGUIISO_00278	GEFL01001133	749	31.74	2	coiled-coil-helix-coiled-coil-helix domain containing 2
OGUIISO_00279	GEFL01001132	932	127.56	10	---NA---
OGUIISO_00280	GEFL01001131	556	85.53	4	---NA---
OGUIISO_00281	GEFL01001130	836	56.88	4	gamma-tubulin complex component 4
OGUIISO_00282	GEFL01001129	649	54.95	3	---NA---
OGUIISO_00283	GEFL01001128	934	50.91	4	---NA---
OGUIISO_00284	GEFL01001127	556	85.53	4	---NA---
OGUIISO_00285	GEFL01001126	806	59	4	utp--glucose-1-phosphate uridylyltransferase
OGUIISO_00286	GEFL01001125	661	53.96	3	utp--glucose-1-phosphate uridylyltransferase
OGUIISO_00287	GEFL01001124	1110	139.23	13	---NA---
OGUIISO_00288	GEFL01001123	307	309.79	8	---NA---
OGUIISO_00289	GEFL01001122	794	44.92	3	protein red
OGUIISO_00290	GEFL01001121	546	43.55	2	protein red
OGUIISO_00291	GEFL01001120	938	76.05	6	---NA---
OGUIISO_00292	GEFL01001119	397	89.84	3	---NA---
OGUIISO_00293	GEFL01001118	736	145.37	9	---NA---
OGUIISO_00294	GEFL01001117	585	40.64	2	---NA---
OGUIISO_00295	GEFL01001116	688	51.84	3	---NA---
OGUIISO_00296	GEFL01001115	616	57.9	3	---NA---
OGUIISO_00297	GEFL01001114	781	45.67	3	---NA---
OGUIISO_00298	GEFL01001113	505	94.17	4	---NA---
OGUIISO_00299	GEFL01001112	808	132.42	9	---NA---
OGUIISO_00300	GEFL01001111	460	103.38	4	---NA---
OGUIISO_00301	GEFL01001110	721	16.49	1	---NA---
OGUIISO_00302	GEFL01001109	516	46.08	2	---NA---
OGUIISO_00303	GEFL01001108	720	115.58	7	serine threonine-protein phosphatase 2b catalytic subunit gamma isoform
OGUIISO_00304	GEFL01001107	484	98.25	4	serine threonine-protein phosphatase 2b catalytic subunit gamma isoform
OGUIISO_00305	GEFL01001106	687	86.52	5	unnamed protein product
OGUIISO_00306	GEFL01001105	506	46.99	2	---NA---
OGUIISO_00307	GEFL01001104	710	50.23	3	---NA---
OGUIISO_00308	GEFL01001103	483	73.84	3	---NA---
OGUIISO_00309	GEFL01001102	587	60.76	3	---NA---
OGUIISO_00310	GEFL01001101	583	61.18	3	---NA---
OGUIISO_00311	GEFL01001100	659	54.12	3	---NA---
OGUIISO_00312	GEFL01001099	494	48.13	2	---NA---
OGUIISO_00313	GEFL01001098	631	113.04	6	luc7 homolog (cerevisiae)- isoform cra_a
OGUIISO_00314	GEFL01001097	505	47.08	2	---NA---
OGUIISO_00315	GEFL01001096	604	78.73	4	---NA---
OGUIISO_00316	GEFL01001095	539	66.17	3	splicing proline- and glutamine-rich
OGUIISO_00317	GEFL01001094	754	189.2	12	l-threonine 3- mitochondrial-like
OGUIISO_00318	GEFL01001093	387	61.44	2	---NA---
OGUIISO_00319	GEFL01001092	645	36.86	2	---NA---
OGUIISO_00320	GEFL01001091	479	49.64	2	---NA---
OGUIISO_00321	GEFL01001090	635	37.44	2	---NA---
OGUIISO_00322	GEFL01001089	480	74.3	3	---NA---
OGUIISO_00323	GEFL01001088	577	20.6	1	---NA---
OGUIISO_00324	GEFL01001087	520	91.45	4	zinc finger protein 850-like
OGUIISO_00325	GEFL01001086	613	38.79	2	dna damage-binding protein 1
OGUIISO_00326	GEFL01001085	478	124.36	5	dna damage-binding protein 1
OGUIISO_00327	GEFL01001084	707	151.34	9	adp-ribosylation factor gtpase-activating protein 3 isoform 2
OGUIISO_00328	GEFL01001083	379	94.1	3	adp-ribosylation factor gtpase-activating protein 3
OGUIISO_00329	GEFL01001082	557	21.34	1	fragile x mental retardation protein 1 homolog
OGUIISO_00330	GEFL01001081	521	45.64	2	fragile x mental retardation syndrome protein
OGUIISO_00331	GEFL01001080	643	55.47	3	ankyrin repeat and kh domain-containing protein 1
OGUIISO_00332	GEFL01001079	432	27.52	1	ankyrin repeat and kh domain-containing protein 1
OGUIISO_00333	GEFL01001078	620	38.35	2	non-specific lipid-transfer protein
OGUIISO_00334	GEFL01001077	445	80.15	3	atp synthase h+ transporting mitochondrial f0 complex subunit f variant 1
OGUIISO_00335	GEFL01001076	554	257.51	12	pol- partial
OGUIISO_00336	GEFL01001075	506	70.48	3	pol- partial
OGUIISO_00337	GEFL01001074	590	40.3	2	intermediate conductance calcium-activated potassium channel protein 4
OGUIISO_00338	GEFL01001073	463	51.35	2	intermediate conductance calcium-activated potassium channel protein 4
OGUIISO_00339	GEFL01001072	718	49.67	3	cold inducible rna binding protein
OGUIISO_00340	GEFL01001071	321	74.07	2	---NA---
OGUIISO_00341	GEFL01001070	580	61.49	3	tumor protein d54
OGUIISO_00342	GEFL01001069	457	52.03	2	tumor protein d54
OGUIISO_00343	GEFL01001068	543	65.68	3	sterol-c4-methyl oxidase-like
OGUIISO_00344	GEFL01001067	493	96.46	4	sterol-c4-methyl oxidase-like
OGUIISO_00345	GEFL01001066	522	45.55	2	heterogeneous nuclear ribonucleoprotein h2
OGUIISO_00346	GEFL01001065	506	70.48	3	heterogeneous nuclear ribonucleoprotein h
OGUIISO_00347	GEFL01001064	583	122.35	6	cell cycle associated protein 1
OGUIISO_00348	GEFL01001063	447	53.19	2	cell cycle associated protein 1
OGUIISO_00349	GEFL01001062	520	45.72	2	gdp-fucose protein o-fucosyltransferase 2
OGUIISO_00350	GEFL01001061	491	48.43	2	gdp-fucose protein o-fucosyltransferase 2
OGUIISO_00351	GEFL01001060	578	41.14	2	copia-type polyprotein
OGUIISO_00352	GEFL01001059	434	109.57	4	copia-type polyprotein
OGUIISO_00353	GEFL01001058	526	45.2	2	differentially expressed in fdcp 8 homolog
OGUIISO_00354	GEFL01001057	420	56.61	2	differentially expressed in fdcp 8 homolog
OGUIISO_00355	GEFL01001056	521	45.64	2	n-alpha-acetyltransferase 50
OGUIISO_00356	GEFL01001055	410	57.99	2	n-alpha-acetyltransferase 50
OGUIISO_00357	GEFL01001054	575	103.38	5	zinc finger protein 572
OGUIISO_00358	GEFL01001053	350	101.9	3	zinc finger protein 572
OGUIISO_00359	GEFL01001052	503	70.9	3	dedicator of cytokinesis protein 11
OGUIISO_00360	GEFL01001051	409	87.2	3	dedicator of cytokinesis 11
OGUIISO_00361	GEFL01001050	473	50.27	2	frataxin
OGUIISO_00362	GEFL01001049	421	56.48	2	mitochondrial-like
OGUIISO_00363	GEFL01001048	460	51.69	2	dna-dependent protein kinase catalytic subunit
OGUIISO_00364	GEFL01001047	401	118.59	4	dna-dependent protein kinase catalytic subunit
OGUIISO_00365	GEFL01001046	433	54.91	2	---NA---
OGUIISO_00366	GEFL01001045	418	28.44	1	PREDICTED: NFATC2-interacting protein-like
OGUIISO_00367	GEFL01001044	417	57.02	2	uhrf1-binding protein 1-like
OGUIISO_00368	GEFL01001043	414	86.15	3	---NA---
OGUIISO_00369	GEFL01001042	497	47.84	2	---NA---
OGUIISO_00370	GEFL01001041	330	36.03	1	rna-directed dna polymerase from mobile element jockey-like
OGUIISO_00371	GEFL01001040	427	55.68	2	rna-directed dna polymerase from mobile element jockey-like
OGUIISO_00372	GEFL01001039	364	32.66	1	reverse partial
OGUIISO_00373	GEFL01001038	390	0	0	---NA---
OGUIISO_00374	GEFL01001037	382	62.24	2	---NA---
OGUIISO_00375	GEFL01001036	441	80.87	3	---NA---
OGUIISO_00376	GEFL01001035	323	2208.37	60	---NA---
OGUIISO_00377	GEFL01001034	347	34.26	1	---NA---
OGUIISO_00378	GEFL01001033	331	35.92	1	---NA---
OGUIISO_00379	GEFL01001032	377	63.07	2	---NA---
OGUIISO_00380	GEFL01001031	243	48.92	1	---NA---
OGUIISO_00381	GEFL01001030	510	46.62	2	eukaryotic translation initiation factor 3 subunit i
OGUIISO_00382	GEFL01001029	1304	1148.72	126	---NA---
OGUIISO_00383	GEFL01001028	690	2515.51	146	proline-rich protein partial
OGUIISO_00384	GEFL01001027	600	396.28	20	---NA---
OGUIISO_00385	GEFL01001026	4917	761.61	315	vascular endothelial growth factor a
OGUIISO_00386	GEFL01001025	4814	3963.61	1605	alpha-2-macroglobulin precursor
OGUIISO_00387	GEFL01001024	4085	2342.75	805	cytochrome c oxidase subunit i
OGUIISO_00388	GEFL01001023	3792	755.56	241	nadh dehydrogenase subunit 5
OGUIISO_00389	GEFL01001022	3415	3167.91	910	eukaryotic translation elongation factor 1 alpha 1
OGUIISO_00390	GEFL01001021	3212	181.36	49	nk-tumor recognition protein
OGUIISO_00391	GEFL01001020	3170	1488.86	397	elongation factor 2
OGUIISO_00392	GEFL01001019	3081	254.67	66	---NA---
OGUIISO_00393	GEFL01001018	2960	313.27	78	aquaporin 5
OGUIISO_00394	GEFL01001017	2882	1456.14	353	polyadenylate-binding protein 1
OGUIISO_00395	GEFL01001016	2872	293.9	71	protein ndrg2 isoform 1
OGUIISO_00396	GEFL01001015	2836	226.37	54	protein g7c-like
OGUIISO_00397	GEFL01001014	2757	2087.04	484	protein disulfide-isomerase precursor
OGUIISO_00398	GEFL01001013	2707	707.07	161	heat shock protein 90kda alpha class b member 1
OGUIISO_00399	GEFL01001012	2622	172.3	38	cd164 sialomucin
OGUIISO_00400	GEFL01001011	2583	418.83	91	nucleolar rna helicase 2
OGUIISO_00401	GEFL01001010	2577	387.51	84	eukaryotic translation initiation factor 4b
OGUIISO_00402	GEFL01001009	2538	107.74	23	fad-dependent oxidoreductase domain-containing protein 1-like
OGUIISO_00403	GEFL01001008	2504	170.92	36	---NA---
OGUIISO_00404	GEFL01001007	2501	2671.44	562	nadh dehydrogenase subunit 1
OGUIISO_00405	GEFL01001006	2489	95.53	20	solute carrier family 1 (neutral amino acid transporter) member 5
OGUIISO_00406	GEFL01001005	2438	131.66	27	ORF2
OGUIISO_00407	GEFL01001004	2394	233.4	47	e3 ubiquitin-protein ligase mylip
OGUIISO_00408	GEFL01001003	2349	273.3	54	deleted in malignant brain tumors 1 protein
OGUIISO_00409	GEFL01001002	2336	916.06	180	transferrin
OGUIISO_00410	GEFL01001001	2327	541.54	106	membrane palmitoylated 55kda
OGUIISO_00411	GEFL01001000	2316	143.73	28	splicing factor 3b subunit 1
OGUIISO_00412	GEFL01000999	2292	160.79	31	rna-binding protein 5
OGUIISO_00413	GEFL01000998	2273	32689.1	6250	ac1147-like protein
OGUIISO_00414	GEFL01000997	2250	163.8	31	splicing arginine serine-rich 5
OGUIISO_00415	GEFL01000996	2189	249.82	46	high mobility group protein b1
OGUIISO_00416	GEFL01000995	2182	163.45	30	glutamine synthetase
OGUIISO_00417	GEFL01000994	2138	255.78	46	60s ribosomal protein l21
OGUIISO_00418	GEFL01000993	2116	134.84	24	protein phosphatase catalytic beta isoform
OGUIISO_00419	GEFL01000992	2098	385.32	68	alpha- -galactosyltransferase
OGUIISO_00420	GEFL01000991	2036	344.51	59	---NA---
OGUIISO_00421	GEFL01000990	2033	187.13	32	translocating chain-associated membrane protein 1
OGUIISO_00422	GEFL01000989	2025	117.42	20	death-associated protein 1
OGUIISO_00423	GEFL01000988	1991	238.84	40	sodium potassium-transporting atpase subunit alpha-1 isoform 2
OGUIISO_00424	GEFL01000987	1970	132.76	22	probable atp-dependent rna helicase ddx17
OGUIISO_00425	GEFL01000986	1967	193.41	32	rna-directed dna polymerase from mobile element jockey-like
OGUIISO_00426	GEFL01000985	1964	302.66	50	kunitz-type protease inhibitor 2 isoform 2
OGUIISO_00427	GEFL01000984	1959	139.58	23	cysteine and glycine-rich protein 1
OGUIISO_00428	GEFL01000983	1953	1022.66	168	cytoplasmic 1
OGUIISO_00429	GEFL01000982	1919	130.1	21	transposon ty3-i gag-pol poly partial
OGUIISO_00430	GEFL01000981	1913	155.36	25	zinc transporter zip13-like
OGUIISO_00431	GEFL01000980	1907	224.43	36	---NA---
OGUIISO_00432	GEFL01000979	1908	1152.7	185	ornithine aminotransferase
OGUIISO_00433	GEFL01000978	1897	156.67	25	5 -nucleotidase domain-containing protein 2-like
OGUIISO_00434	GEFL01000977	1897	169.21	27	bifunctional purine biosynthesis protein purh
OGUIISO_00435	GEFL01000976	1895	125.47	20	retinoblastoma binding protein 4
OGUIISO_00436	GEFL01000975	1876	481.62	76	keratin 7
OGUIISO_00437	GEFL01000974	1863	1193.3	187	c-type natriuretic peptide precursor
OGUIISO_00438	GEFL01000973	1840	122.76	19	rna-directed dna polymerase from mobile element jockey-like
OGUIISO_00439	GEFL01000972	1813	183.6	28	adp-ribosylation factor-like protein 6-interacting protein 1
OGUIISO_00440	GEFL01000971	1812	269	41	protein disulfide-isomerase a3 precursor
OGUIISO_00441	GEFL01000970	1801	138.62	21	transmembrane protein 63c
OGUIISO_00442	GEFL01000969	1792	298.54	45	t-complex 1
OGUIISO_00443	GEFL01000968	1797	145.54	22	---NA---
OGUIISO_00444	GEFL01000967	1786	93.19	14	retrovirus-related pol polyprotein line-1
OGUIISO_00445	GEFL01000966	1782	293.54	44	integral membrane protein 2a
OGUIISO_00446	GEFL01000965	1762	141.69	21	transmembrane emp24 domain-containing protein 2
OGUIISO_00447	GEFL01000964	1735	171.3	25	coatomer subunit beta
OGUIISO_00448	GEFL01000963	1723	172.5	25	purinergic receptor ligand-gated ion 4
OGUIISO_00449	GEFL01000962	1705	195.23	28	d-3-phosphoglycerate dehydrogenase
OGUIISO_00450	GEFL01000961	1687	169.13	24	---NA---
OGUIISO_00451	GEFL01000960	1687	91.61	13	chaperone activity of bc1 complex- mitochondrial-like
OGUIISO_00452	GEFL01000959	1686	169.23	24	heterogeneous nuclear ribonucleoprotein a3
OGUIISO_00453	GEFL01000958	1684	148.25	21	probable atp-dependent rna helicase ddx17
OGUIISO_00454	GEFL01000957	1679	212.42	30	ribophorin i
OGUIISO_00455	GEFL01000956	1659	157.65	22	eukaryotic translation initiation factor 3 subunit d
OGUIISO_00456	GEFL01000955	1646	202.23	28	staphylococcal nuclease domain-containing protein 1
OGUIISO_00457	GEFL01000954	1637	530.15	73	rna-directed dna polymerase from mobile element jockey-like
OGUIISO_00458	GEFL01000953	1616	882.8	120	mesothelin
OGUIISO_00459	GEFL01000952	1598	119.03	16	gelsolin isoform b
OGUIISO_00460	GEFL01000951	1609	192.11	26	l1-encoded reverse transcriptase-like protein
OGUIISO_00461	GEFL01000950	1588	209.62	28	tumor protein d52
OGUIISO_00462	GEFL01000949	1585	247.52	33	aldolase fructose-bisphosphate
OGUIISO_00463	GEFL01000948	1586	187.4	25	receptor expression-enhancing protein 5
OGUIISO_00464	GEFL01000947	1584	405.29	54	protein transport protein sec61 subunit alpha isoform 1
OGUIISO_00465	GEFL01000946	1584	270.19	36	dna-dependent protein kinase catalytic subunit
OGUIISO_00466	GEFL01000945	1579	97.88	13	type ii cytoskeletal 5
OGUIISO_00467	GEFL01000944	1574	468.28	62	egf-like repeat and discoidin i-like domain-containing protein 3-like
OGUIISO_00468	GEFL01000943	1571	128.65	17	nucleolysin tiar isoform 2
OGUIISO_00469	GEFL01000942	1562	494.71	65	tetraspanin 1
OGUIISO_00470	GEFL01000941	1560	137.17	18	phosphogluconate dehydrogenase
OGUIISO_00471	GEFL01000940	1552	183.84	24	---NA---
OGUIISO_00472	GEFL01000939	1548	153.6	20	nedd4 family-interacting protein 1
OGUIISO_00473	GEFL01000938	1538	123.68	16	---NA---
OGUIISO_00474	GEFL01000937	1539	463.48	60	chitinase 1
OGUIISO_00475	GEFL01000936	1508	126.14	16	eukaryotic translation initiation factor 4 gamma 2 isoform 1
OGUIISO_00476	GEFL01000935	1507	1388.42	176	eukaryotic translation elongation factor 1 gamma
OGUIISO_00477	GEFL01000934	1495	127.23	16	basigin precursor
OGUIISO_00478	GEFL01000933	1486	88	11	nipa-like domain containing 3
OGUIISO_00479	GEFL01000932	1487	175.89	22	malate cytoplasmic isoform 2
OGUIISO_00480	GEFL01000931	1485	144.1	18	eukaryotic translation initiation factor 3 subunit b
OGUIISO_00481	GEFL01000930	1476	136.93	17	utp--glucose-1-phosphate uridylyltransferase
OGUIISO_00482	GEFL01000929	1479	996.73	124	transcript antisense to ribosomal rna protein
OGUIISO_00483	GEFL01000928	1477	169.03	21	t-complex protein 1 subunit epsilon
OGUIISO_00484	GEFL01000927	1458	81.54	10	tetraspanin 3
OGUIISO_00485	GEFL01000926	1464	251.73	31	immunoglobulin m heavy chain constant region
OGUIISO_00486	GEFL01000925	1460	244.28	30	keratin 18
OGUIISO_00487	GEFL01000924	1456	138.81	17	citrate synthase
OGUIISO_00488	GEFL01000923	1460	268.71	33	non-specific lipid-transfer protein
OGUIISO_00489	GEFL01000922	1446	213.76	26	rna-directed dna polymerase from mobile element jockey-like
OGUIISO_00490	GEFL01000921	1447	312.2	38	eukaryotic translation initiation factor 3 subunit e
OGUIISO_00491	GEFL01000920	1444	98.8	12	atp-binding cassette sub-family f member 2
OGUIISO_00492	GEFL01000919	1444	2346.39	285	ribosomal p0
OGUIISO_00493	GEFL01000918	1438	99.21	12	---NA---
OGUIISO_00494	GEFL01000917	1434	140.94	17	intracellular hyaluronan-binding protein 4
OGUIISO_00495	GEFL01000916	1430	224.47	27	---NA---
OGUIISO_00496	GEFL01000915	1430	116.39	14	---NA---
OGUIISO_00497	GEFL01000914	1423	133.67	16	---NA---
OGUIISO_00498	GEFL01000913	1418	75.46	9	macrophage erythroblast attacher
OGUIISO_00499	GEFL01000912	1416	1318.13	157	eukaryotic translation initiation factor 4e-binding protein 1
OGUIISO_00500	GEFL01000911	1403	152.52	18	rna-binding protein luc7-like 1
OGUIISO_00501	GEFL01000910	1400	475.53	56	class a basic helix-loop-helix protein 15
OGUIISO_00502	GEFL01000909	1399	127.47	15	atp-binding cassette sub-family f member 1
OGUIISO_00503	GEFL01000908	1399	416.39	49	annexin a2
OGUIISO_00504	GEFL01000907	1399	2277.4	268	translationally-controlled tumor protein
OGUIISO_00505	GEFL01000906	1387	77.14	9	upf0577 protein kiaa1324- partial
OGUIISO_00506	GEFL01000905	1393	170.69	20	ribosome biogenesis protein nsa2 homolog
OGUIISO_00507	GEFL01000904	1378	94.9	11	---NA---
OGUIISO_00508	GEFL01000903	1387	497.13	58	glutathione peroxidase 3 precursor
OGUIISO_00509	GEFL01000902	1371	147.41	17	prostaglandin e synthase 3
OGUIISO_00510	GEFL01000901	1358	105.05	12	phosphotidylinositol phosphatase ptprq-like
OGUIISO_00511	GEFL01000900	1362	122.2	14	cationic amino acid transporter 3
OGUIISO_00512	GEFL01000899	1358	148.82	17	---NA---
OGUIISO_00513	GEFL01000898	1354	87.8	10	golgi reassembly-stacking protein 2 isoform 1
OGUIISO_00514	GEFL01000897	1354	96.58	11	---NA---
OGUIISO_00515	GEFL01000896	1345	106.07	12	gdp dissociation inhibitor 2
OGUIISO_00516	GEFL01000895	1348	229.3	26	ribosomal protein l19
OGUIISO_00517	GEFL01000894	1347	158.86	18	serine threonine-protein phosphatase 2a catalytic subunit beta isoform
OGUIISO_00518	GEFL01000893	1336	133.48	15	peptidase (mitochondrial processing) beta
OGUIISO_00519	GEFL01000892	1344	106.15	12	cold shock domain-containing protein e1
OGUIISO_00520	GEFL01000891	1344	415.74	47	y box binding protein 1
OGUIISO_00521	GEFL01000890	1337	142.27	16	---NA---
OGUIISO_00522	GEFL01000889	1336	88.98	10	branched-chain-amino-acid cytosolic
OGUIISO_00523	GEFL01000888	1339	106.54	12	sodium potassium-transporting atpase subunit beta-1
OGUIISO_00524	GEFL01000887	1338	186.59	21	voltage-dependent anion channel 2
OGUIISO_00525	GEFL01000886	1336	258.06	29	cellular nucleic acid binding protein
OGUIISO_00526	GEFL01000885	1338	328.75	37	cytoplasmic 1
OGUIISO_00527	GEFL01000884	1322	116.91	13	cbp p300-interacting transactivator 3-like
OGUIISO_00528	GEFL01000883	1323	98.85	11	protein tyrosine phosphatase type member 2
OGUIISO_00529	GEFL01000882	1321	116.99	13	---NA---
OGUIISO_00530	GEFL01000881	1322	116.91	13	microtubule-associated proteins 1a 1b light chain 3b
OGUIISO_00531	GEFL01000880	1318	81.18	9	nadh dehydrogenase
OGUIISO_00532	GEFL01000879	1322	692.44	77	selenoprotein m precursor
OGUIISO_00533	GEFL01000878	1308	163.6	18	glucose phosphate isomerase
OGUIISO_00534	GEFL01000877	1303	301.09	33	---NA---
OGUIISO_00535	GEFL01000876	1291	488.06	53	peroxiredoxin 6
OGUIISO_00536	GEFL01000875	1292	561.29	61	lactate dehydrogenase b
OGUIISO_00537	GEFL01000874	1290	147.45	16	osteoclast-stimulating factor 1
OGUIISO_00538	GEFL01000873	1288	101.53	11	thioredoxin interacting protein
OGUIISO_00539	GEFL01000872	1290	230.39	25	nucleobindin 2
OGUIISO_00540	GEFL01000871	1285	166.53	18	---NA---
OGUIISO_00541	GEFL01000870	1286	101.69	11	transmembrane emp24 domain-containing protein 9-like
OGUIISO_00542	GEFL01000869	1286	129.42	14	cytochrome b-c1 complex subunit mitochondrial-like
OGUIISO_00543	GEFL01000868	1279	130.13	14	protein disulfide-isomerase a6-like
OGUIISO_00544	GEFL01000867	1278	260.47	28	calreticulin
OGUIISO_00545	GEFL01000866	1273	205.46	22	---NA---
OGUIISO_00546	GEFL01000865	1270	149.77	16	matrix metalloproteinase 9
OGUIISO_00547	GEFL01000864	1270	177.86	19	nuclear protein 1-like
OGUIISO_00548	GEFL01000863	1268	150.01	16	d chain low resolution structures of bovine mitochondrial f1-atpase during controlled dehydration: hydration state
OGUIISO_00549	GEFL01000862	1267	572.37	61	phosphate carrier mitochondrial
OGUIISO_00550	GEFL01000861	1266	122.08	13	---NA---
OGUIISO_00551	GEFL01000860	1264	112.86	12	serine arginine repetitive matrix 1
OGUIISO_00552	GEFL01000859	1251	152.05	16	transmembrane protein 59
OGUIISO_00553	GEFL01000858	1256	179.84	19	---NA---
OGUIISO_00554	GEFL01000857	1255	1913.51	202	ribosomal protein l4
OGUIISO_00555	GEFL01000856	1254	94.8	10	heterogeneous nuclear ribonucleoprotein a2 b1
OGUIISO_00556	GEFL01000855	1247	95.34	10	filamin alpha
OGUIISO_00557	GEFL01000854	1247	143	15	muc5ac protein
OGUIISO_00558	GEFL01000853	1240	115.05	12	non-histone chromosomal protein hmg-14-like
OGUIISO_00559	GEFL01000852	1237	172.99	18	glioma tumor suppressor candidate region gene 2 protein
OGUIISO_00560	GEFL01000851	1236	250.08	26	translocon-associated protein subunit beta-like
OGUIISO_00561	GEFL01000850	1235	105.89	11	t-complex protein 1 subunit gamma-like isoform 2
OGUIISO_00562	GEFL01000849	1237	345.98	36	na+ k+ alpha 1 polypeptide
OGUIISO_00563	GEFL01000848	1227	116.27	12	transmembrane 9 superfamily member 2
OGUIISO_00564	GEFL01000847	1232	424.58	44	ribosomal protein l3
OGUIISO_00565	GEFL01000846	1228	116.17	12	ancient ubiquitous protein 1
OGUIISO_00566	GEFL01000845	1214	195.85	20	aldolase fructose-bisphosphate
OGUIISO_00567	GEFL01000844	1210	186.68	19	---NA---
OGUIISO_00568	GEFL01000843	1207	118.19	12	estrogen receptor binding site 9
OGUIISO_00569	GEFL01000842	1206	966.05	98	glyceraldehyde-3-phosphate dehydrogenase
OGUIISO_00570	GEFL01000841	1196	178.92	18	---NA---
OGUIISO_00571	GEFL01000840	1200	99.07	10	cancer susceptibility candidate 4
OGUIISO_00572	GEFL01000839	1190	69.93	7	3-hydroxyisobutyryl- mitochondrial
OGUIISO_00573	GEFL01000838	1192	109.71	11	eukaryotic translation initiation factor subunit b
OGUIISO_00574	GEFL01000837	1188	110.08	11	scaffold attachment factor b2
OGUIISO_00575	GEFL01000836	1178	121.1	12	vesicle-associated membrane protein 8
OGUIISO_00576	GEFL01000835	1182	130.75	13	huntingtin-interacting protein 1-related protein
OGUIISO_00577	GEFL01000834	1182	432.49	43	---NA---
OGUIISO_00578	GEFL01000833	1178	131.2	13	78 kda glucose-regulated protein precursor
OGUIISO_00579	GEFL01000832	1175	91.06	9	---NA---
OGUIISO_00580	GEFL01000831	1167	101.87	10	cold shock domain-containing protein e1-like isoform 2
OGUIISO_00581	GEFL01000830	1173	222.97	22	adp atp translocase 2
OGUIISO_00582	GEFL01000829	1171	142.13	14	p53 apoptosis effector related to pmp-22-like
OGUIISO_00583	GEFL01000828	1171	182.74	18	galectin-4
OGUIISO_00584	GEFL01000827	1169	152.55	15	malate mitochondrial-like
OGUIISO_00585	GEFL01000826	1166	183.53	18	eukaryotic translation initiation factor 3 subunit m
OGUIISO_00586	GEFL01000825	1161	255.99	25	---NA---
OGUIISO_00587	GEFL01000824	1158	133.46	13	alcohol dehydrogenase
OGUIISO_00588	GEFL01000823	1147	134.74	13	---NA---
OGUIISO_00589	GEFL01000822	1152	82.56	8	eukaryotic translation initiation factor 4 2
OGUIISO_00590	GEFL01000821	1150	144.73	14	---NA---
OGUIISO_00591	GEFL01000820	1144	62.35	6	rna-directed dna polymerase from mobile element jockey-like
OGUIISO_00592	GEFL01000819	1146	124.49	12	---NA---
OGUIISO_00593	GEFL01000818	1150	82.7	8	---NA---
OGUIISO_00594	GEFL01000817	1145	83.06	8	atp-dependent rna helicase ddx3x
OGUIISO_00595	GEFL01000816	1143	156.02	15	atp-binding cassette sub-family f member 1
OGUIISO_00596	GEFL01000815	1139	146.13	14	---NA---
OGUIISO_00597	GEFL01000814	1139	219.19	21	glycerol-3-phosphate dehydrogenase 1-like protein
OGUIISO_00598	GEFL01000813	1141	187.55	18	ficolin (collagen fibrinogen domain containing) 1
OGUIISO_00599	GEFL01000812	1134	83.87	8	constitutive coactivator of ppar-gamma-like protein 1-like
OGUIISO_00600	GEFL01000811	1138	198.49	19	alpha skeletal muscle
OGUIISO_00601	GEFL01000810	1135	209.49	20	transmembrane protein 214 isoform 2
OGUIISO_00602	GEFL01000809	1135	104.74	10	---NA---
OGUIISO_00603	GEFL01000808	1133	94.44	9	probable phospholipid-transporting atpase if
OGUIISO_00604	GEFL01000807	1128	105.39	10	---NA---
OGUIISO_00605	GEFL01000806	1131	105.11	10	nuclear migration protein nudc
OGUIISO_00606	GEFL01000805	1125	95.11	9	---NA---
OGUIISO_00607	GEFL01000804	1138	177.59	17	vesicular integral-membrane protein vip36
OGUIISO_00608	GEFL01000803	1120	159.22	15	bactericidal permeability-increasing 3
OGUIISO_00609	GEFL01000802	1120	159.22	15	acyl- synthetase family member mitochondrial
OGUIISO_00610	GEFL01000801	1120	84.92	8	---NA---
OGUIISO_00611	GEFL01000800	1106	193.48	18	tetraspanin-15
OGUIISO_00612	GEFL01000799	1113	74.77	7	voltage-dependent anion channel 1
OGUIISO_00613	GEFL01000798	1108	75.11	7	---NA---
OGUIISO_00614	GEFL01000797	1105	150.62	14	---NA---
OGUIISO_00615	GEFL01000796	1098	151.58	14	ncl protein
OGUIISO_00616	GEFL01000795	1097	86.7	8	chromosome 6 open reading frame 72
OGUIISO_00617	GEFL01000794	1101	118.78	11	tax1-binding protein 1 isoform 1
OGUIISO_00618	GEFL01000793	1101	129.57	12	immunoglobulin j chain
OGUIISO_00619	GEFL01000792	1096	97.62	9	---NA---
OGUIISO_00620	GEFL01000791	1098	606.33	56	60s ribosomal protein l5
OGUIISO_00621	GEFL01000790	1097	151.72	14	tropomyosin 2
OGUIISO_00622	GEFL01000789	1099	86.54	8	complement component 1 q subcomponent-binding mitochondrial-like
OGUIISO_00623	GEFL01000788	1094	76.07	7	---NA---
OGUIISO_00624	GEFL01000787	1096	108.47	10	amyloid protein-binding protein 2
OGUIISO_00625	GEFL01000786	1089	65.5	6	---NA---
OGUIISO_00626	GEFL01000785	1092	130.64	12	transmembrane emp24 domain-containing protein 10-like
OGUIISO_00627	GEFL01000784	1091	1024.3	94	guanine nucleotide-binding protein subunit beta-2-like 1
OGUIISO_00628	GEFL01000783	1087	207.8	19	eukaryotic translation initiation factor 3 subunit f
OGUIISO_00629	GEFL01000782	1091	228.83	21	stress-associated endoplasmic reticulum protein 1
OGUIISO_00630	GEFL01000781	1087	54.68	5	protein arginine methyltransferase 1
OGUIISO_00631	GEFL01000780	1091	1961.42	180	cytochrome b
OGUIISO_00632	GEFL01000779	1082	120.86	11	pulmonary surfactant-associated protein d-like
OGUIISO_00633	GEFL01000778	1082	175.8	16	epididymal secretory protein 4-like
OGUIISO_00634	GEFL01000777	1077	55.19	5	phosphoglucomutase 2
OGUIISO_00635	GEFL01000776	1079	165.27	15	---NA---
OGUIISO_00636	GEFL01000775	1076	88.39	8	rho gdp-dissociation inhibitor 1
OGUIISO_00637	GEFL01000774	1073	110.8	10	iron-sulfur cluster assembly enzyme mitochondrial
OGUIISO_00638	GEFL01000773	1073	88.64	8	transaldolase
OGUIISO_00639	GEFL01000772	1073	155.11	14	atp-binding cassette sub-family e member 1
OGUIISO_00640	GEFL01000771	1069	133.45	12	---NA---
OGUIISO_00641	GEFL01000770	1071	177.6	16	er degradation-enhancing alpha-mannosidase-like 2 isoform 2
OGUIISO_00642	GEFL01000769	1069	133.45	12	rna-directed dna polymerase from mobile element jockey-like
OGUIISO_00643	GEFL01000768	1068	389.6	35	eukaryotic translation initiation factor 1
OGUIISO_00644	GEFL01000767	1064	89.39	8	echinoderm microtubule-associated 4 isoform 2
OGUIISO_00645	GEFL01000766	1056	135.1	12	orf2-encoded protein
OGUIISO_00646	GEFL01000765	1059	179.62	16	complement c3-like
OGUIISO_00647	GEFL01000764	1060	112.15	10	antizyme inhibitor 1
OGUIISO_00648	GEFL01000763	1059	123.49	11	---NA---
OGUIISO_00649	GEFL01000762	1055	146.49	13	cathepsin b
OGUIISO_00650	GEFL01000761	1055	495.82	44	nadh dehydrogenase subunit 2
OGUIISO_00651	GEFL01000760	1052	192.11	17	---NA---
OGUIISO_00652	GEFL01000759	1047	90.84	8	glycerophosphodiester phosphodiesterase 1
OGUIISO_00653	GEFL01000758	1046	90.92	8	integral membrane protein 2b
OGUIISO_00654	GEFL01000757	1042	114.09	10	lysosomal-associated transmembrane protein 4a
OGUIISO_00655	GEFL01000756	1040	91.45	8	ste20 sps1-related proline-alanine-rich protein kinase
OGUIISO_00656	GEFL01000755	1043	125.38	11	tetraspanin-13
OGUIISO_00657	GEFL01000754	1040	148.6	13	cd9 antigen
OGUIISO_00658	GEFL01000753	1038	68.72	6	---NA---
OGUIISO_00659	GEFL01000752	1036	160.65	14	non-pou domain-containing octamer-binding protein
OGUIISO_00660	GEFL01000751	1036	183.6	16	minor histocompatibility antigen h13 isoform 1
OGUIISO_00661	GEFL01000750	1034	241.45	21	---NA---
OGUIISO_00662	GEFL01000749	1037	91.71	8	flna protein
OGUIISO_00663	GEFL01000748	1031	115.31	10	rna-directed dna polymerase from mobile element jockey-like
OGUIISO_00664	GEFL01000747	1032	149.76	13	proliferation-associated protein 2g4
OGUIISO_00665	GEFL01000746	1033	172.63	15	---NA---
OGUIISO_00666	GEFL01000745	1030	69.25	6	arginyl aminopeptidase (aminopeptidase b)-like 1
OGUIISO_00667	GEFL01000744	1031	103.78	9	complement factor h
OGUIISO_00668	GEFL01000743	1024	162.54	14	phospholipase d3
OGUIISO_00669	GEFL01000742	1024	174.15	15	vacuolar atp synthase 16 kda proteolipid subunit
OGUIISO_00670	GEFL01000741	1025	92.79	8	---NA---
OGUIISO_00671	GEFL01000740	1020	128.21	11	carboxy-terminal domain rna polymerase ii polypeptide a small phosphatase 2
OGUIISO_00672	GEFL01000739	1015	187.4	16	---NA---
OGUIISO_00673	GEFL01000738	1009	94.26	8	---NA---
OGUIISO_00674	GEFL01000737	1013	93.89	8	---NA---
OGUIISO_00675	GEFL01000736	1014	2755.2	235	serum amyloid p-component-like
OGUIISO_00676	GEFL01000735	1010	141.25	12	mucin subtype tracheobronchial precursor
OGUIISO_00677	GEFL01000734	1011	258.7	22	---NA---
OGUIISO_00678	GEFL01000733	1008	129.73	11	---NA---
OGUIISO_00679	GEFL01000732	1004	201.3	17	iron zinc purple acid phosphatase-like
OGUIISO_00680	GEFL01000731	1005	118.29	10	---NA---
OGUIISO_00681	GEFL01000730	1004	402.59	34	---NA---
OGUIISO_00682	GEFL01000729	999	107.1	9	glutaminyl-peptide cyclotransferase
OGUIISO_00683	GEFL01000728	1000	118.88	10	cytosolic non-specific dipeptidase-like
OGUIISO_00684	GEFL01000727	996	107.43	9	---NA---
OGUIISO_00685	GEFL01000726	993	191.55	16	transducer of 1
OGUIISO_00686	GEFL01000725	996	71.62	6	glutamyl aminopeptidase
OGUIISO_00687	GEFL01000724	994	358.8	30	cofilin-2
OGUIISO_00688	GEFL01000723	991	143.96	12	calmodulin
OGUIISO_00689	GEFL01000722	987	180.67	15	histone
OGUIISO_00690	GEFL01000721	992	167.78	14	vimentin
OGUIISO_00691	GEFL01000720	989	120.21	10	alpha 1b
OGUIISO_00692	GEFL01000719	989	264.45	22	---NA---
OGUIISO_00693	GEFL01000718	988	120.33	10	ORF2
OGUIISO_00694	GEFL01000717	987	108.4	9	---NA---
OGUIISO_00695	GEFL01000716	983	108.85	9	---NA---
OGUIISO_00696	GEFL01000715	983	157.22	13	s-phase kinase-associated protein 1
OGUIISO_00697	GEFL01000714	985	120.69	10	---NA---
OGUIISO_00698	GEFL01000713	982	447.93	37	ribosomal protein sa
OGUIISO_00699	GEFL01000712	980	72.79	6	achain lem domain of human inner nuclear membrane protein emerin
OGUIISO_00700	GEFL01000711	977	121.68	10	lysosome-associated membrane glycoprotein 1
OGUIISO_00701	GEFL01000710	975	134.13	11	---NA---
OGUIISO_00702	GEFL01000709	971	110.19	9	sid1 transmembrane family member 1
OGUIISO_00703	GEFL01000708	962	98.86	8	mesencephalic astrocyte-derived neurotrophic factor
OGUIISO_00704	GEFL01000707	967	135.23	11	ribophorin ii
OGUIISO_00705	GEFL01000706	968	98.25	8	rna-directed dna polymerase from mobile element jockey-like
OGUIISO_00706	GEFL01000705	960	111.45	9	hla-b associated transcript 1
OGUIISO_00707	GEFL01000704	964	110.99	9	---NA---
OGUIISO_00708	GEFL01000703	962	86.51	7	peroxisomal biogenesis factor 19
OGUIISO_00709	GEFL01000702	959	235.54	19	---NA---
OGUIISO_00710	GEFL01000701	958	99.28	8	alkaline phosphatase
OGUIISO_00711	GEFL01000700	960	99.07	8	mediator of cell motility 1
OGUIISO_00712	GEFL01000699	959	929.75	75	ribosomal protein s2
OGUIISO_00713	GEFL01000698	957	86.96	7	---NA---
OGUIISO_00714	GEFL01000697	957	149.07	12	---NA---
OGUIISO_00715	GEFL01000696	955	99.59	8	---NA---
OGUIISO_00716	GEFL01000695	957	161.49	13	cd63 antigen-like
OGUIISO_00717	GEFL01000694	956	124.36	10	---NA---
OGUIISO_00718	GEFL01000693	955	236.52	19	---NA---
OGUIISO_00719	GEFL01000692	955	124.49	10	poly -specific ribonuclease parn isoform 1
OGUIISO_00720	GEFL01000691	951	162.51	13	preli domain-containing protein mitochondrial
OGUIISO_00721	GEFL01000690	950	100.11	8	---NA---
OGUIISO_00722	GEFL01000689	944	113.34	9	heterogeneous nuclear ribonucleoprotein a b
OGUIISO_00723	GEFL01000688	944	176.31	14	polymeric immunoglobulin receptor
OGUIISO_00724	GEFL01000687	947	100.43	8	---NA---
OGUIISO_00725	GEFL01000686	943	113.46	9	sialin
OGUIISO_00726	GEFL01000685	943	100.86	8	rna-directed dna polymerase from mobile element jockey-like
OGUIISO_00727	GEFL01000684	939	88.62	7	actin-related protein 2 3 complex subunit 2
OGUIISO_00728	GEFL01000683	937	101.5	8	sialic acid synthase
OGUIISO_00729	GEFL01000682	936	114.31	9	catenin beta-1
OGUIISO_00730	GEFL01000681	936	850.98	67	40s ribosomal protein s4
OGUIISO_00731	GEFL01000680	934	127.28	10	reverse transcriptase family protein
OGUIISO_00732	GEFL01000679	933	101.94	8	zinc finger miz domain-containing protein 2 isoform 1
OGUIISO_00733	GEFL01000678	931	102.16	8	protein lyric
OGUIISO_00734	GEFL01000677	928	115.3	9	glutamate dehydrogenase mitochondrial-like
OGUIISO_00735	GEFL01000676	927	166.72	13	myosin-9
OGUIISO_00736	GEFL01000675	929	166.36	13	protein phosphatase 1 regulatory subunit 1b
OGUIISO_00737	GEFL01000674	923	64.4	5	calcium-transporting atpase type 2c member partial
OGUIISO_00738	GEFL01000673	924	77.2	6	---NA---
OGUIISO_00739	GEFL01000672	921	103.26	8	g-rich sequence factor 1
OGUIISO_00740	GEFL01000671	922	219.2	17	high density lipoprotein binding isoform cra_b
OGUIISO_00741	GEFL01000670	915	64.96	5	pdz and lim domain protein 3
OGUIISO_00742	GEFL01000669	919	310.47	24	ornithine decarboxylase antizyme 1
OGUIISO_00743	GEFL01000668	919	103.49	8	atpase h+ transporting v1 subunit g isoform 1
OGUIISO_00744	GEFL01000667	917	77.79	6	---NA---
OGUIISO_00745	GEFL01000666	916	90.85	7	adp-ribosylation factor gtpase activating protein 3
OGUIISO_00746	GEFL01000665	912	130.35	10	protein set isoform 2
OGUIISO_00747	GEFL01000664	917	2268.77	175	c-reactive protein
OGUIISO_00748	GEFL01000663	916	1090.2	84	ribosomal protein l8
OGUIISO_00749	GEFL01000662	916	142.76	11	adaptor-related protein complex mu 1 subunit
OGUIISO_00750	GEFL01000661	914	299.16	23	signal peptidase complex subunit 3
OGUIISO_00751	GEFL01000660	913	169.28	13	phospholipase b-like 1
OGUIISO_00752	GEFL01000659	914	130.07	10	---NA---
OGUIISO_00753	GEFL01000658	913	312.51	24	bax inhibitor 1
OGUIISO_00754	GEFL01000657	914	104.06	8	n-lysine methyltransferase smyd2
OGUIISO_00755	GEFL01000656	907	78.64	6	ankyrin repeat domain-containing protein 13c
OGUIISO_00756	GEFL01000655	907	183.5	14	type ii cytoskeletal 8-like
OGUIISO_00757	GEFL01000654	910	235.15	18	---NA---
OGUIISO_00758	GEFL01000653	904	236.72	18	nucleophosmin-like isoform 1
OGUIISO_00759	GEFL01000652	893	93.19	7	pre-mrna branch site protein p14
OGUIISO_00760	GEFL01000651	900	184.93	14	proteasome subunit beta type-4
OGUIISO_00761	GEFL01000650	898	105.91	8	disintegrin and metalloproteinase domain-containing protein 10
OGUIISO_00762	GEFL01000649	896	79.61	6	---NA---
OGUIISO_00763	GEFL01000648	892	119.95	9	---NA---
OGUIISO_00764	GEFL01000647	893	79.88	6	---NA---
OGUIISO_00765	GEFL01000646	892	146.61	11	transforming protein
OGUIISO_00766	GEFL01000645	891	106.74	8	---NA---
OGUIISO_00767	GEFL01000644	890	187.01	14	---NA---
OGUIISO_00768	GEFL01000643	890	120.22	9	---NA---
OGUIISO_00769	GEFL01000642	889	106.98	8	t-complex protein 1 subunit beta
OGUIISO_00770	GEFL01000641	887	254.66	19	atp synthase subunit mitochondrial
OGUIISO_00771	GEFL01000640	882	94.35	7	calmodulin
OGUIISO_00772	GEFL01000639	883	228.88	17	atp h+ mitochondrial f1 alpha subunit cardiac muscle
OGUIISO_00773	GEFL01000638	882	256.1	19	peroxiredoxin 4
OGUIISO_00774	GEFL01000637	882	148.27	11	staphylococcal nuclease domain-containing protein 1
OGUIISO_00775	GEFL01000636	881	107.95	8	heat shock cognate 71 kda protein
OGUIISO_00776	GEFL01000635	875	81.52	6	plectin isoform 1hij
OGUIISO_00777	GEFL01000634	876	190	14	---NA---
OGUIISO_00778	GEFL01000633	876	162.85	12	syntenin-1 isoform 2
OGUIISO_00779	GEFL01000632	873	313.21	23	beta-2-microglobulin precursor
OGUIISO_00780	GEFL01000631	875	67.93	5	sortilin 1
OGUIISO_00781	GEFL01000630	872	122.7	9	glutaminyl-peptide cyclotransferase
OGUIISO_00782	GEFL01000629	867	150.83	11	---NA---
OGUIISO_00783	GEFL01000628	870	177.64	13	phosphatidylethanolamine-binding protein variant 1
OGUIISO_00784	GEFL01000627	866	205.92	15	chaperonin containing subunit 4
OGUIISO_00785	GEFL01000626	865	68.72	5	vigilin
OGUIISO_00786	GEFL01000625	865	109.95	8	myelin protein zero-like protein 3 isoform 2
OGUIISO_00787	GEFL01000624	863	137.76	10	---NA---
OGUIISO_00788	GEFL01000623	860	110.59	8	---NA---
OGUIISO_00789	GEFL01000622	861	455.65	33	glutathione s-transferase theta-1-like
OGUIISO_00790	GEFL01000621	860	787.95	57	PREDICTED: uncharacterized protein LOC100925129
OGUIISO_00791	GEFL01000620	859	221.44	16	vigilin
OGUIISO_00792	GEFL01000619	853	209.06	15	nadph--cytochrome p450 reductase-like
OGUIISO_00793	GEFL01000618	854	125.29	9	---NA---
OGUIISO_00794	GEFL01000617	853	83.62	6	sumo-activating enzyme subunit 2
OGUIISO_00795	GEFL01000616	850	111.89	8	---NA---
OGUIISO_00796	GEFL01000615	855	152.95	11	---NA---
OGUIISO_00797	GEFL01000614	848	266.37	19	chloride intracellular channel protein 1
OGUIISO_00798	GEFL01000613	849	7435.49	531	---NA---
OGUIISO_00799	GEFL01000612	846	281.05	20	60s ribosomal protein l27a-like
OGUIISO_00800	GEFL01000611	845	84.41	6	---NA---
OGUIISO_00801	GEFL01000610	847	140.36	10	phosphoglycerate kinase 1
OGUIISO_00802	GEFL01000609	846	154.58	11	hsc70-interacting protein
OGUIISO_00803	GEFL01000608	845	211.04	15	transmembrane protein 214
OGUIISO_00804	GEFL01000607	845	1336.56	95	ribosomal protein l7a
OGUIISO_00805	GEFL01000606	837	99.42	7	---NA---
OGUIISO_00806	GEFL01000605	841	113.09	8	death effector domain-containing protein
OGUIISO_00807	GEFL01000604	841	98.95	7	plasminogen activator inhibitor 1 rna-binding
OGUIISO_00808	GEFL01000603	833	99.9	7	---NA---
OGUIISO_00809	GEFL01000602	835	85.43	6	---NA---
OGUIISO_00810	GEFL01000601	838	156.05	11	dolichyl-diphosphooligosaccharide--protein glycosyltransferase subunit stt3a-like
OGUIISO_00811	GEFL01000600	837	99.42	7	rna-directed dna polymerase from mobile element jockey-like
OGUIISO_00812	GEFL01000599	833	71.36	5	cyclin pas1 pho80 domain containing 1
OGUIISO_00813	GEFL01000598	838	113.49	8	polyadenylate-binding protein-interacting protein 2
OGUIISO_00814	GEFL01000597	838	85.12	6	small ubiquitin-related modifier 2 precursor
OGUIISO_00815	GEFL01000596	833	128.45	9	saccharopine dehydrogenase
OGUIISO_00816	GEFL01000595	830	286.47	20	serine-threonine kinase receptor-associated protein
OGUIISO_00817	GEFL01000594	831	114.45	8	---NA---
OGUIISO_00818	GEFL01000593	831	100.14	7	arglu1 protein
OGUIISO_00819	GEFL01000592	831	529.33	37	cold inducible rna binding protein
OGUIISO_00820	GEFL01000591	826	86.36	6	low quality protein: mucin-5b-like
OGUIISO_00821	GEFL01000590	830	143.23	10	protein dj-1
OGUIISO_00822	GEFL01000589	828	100.51	7	---NA---
OGUIISO_00823	GEFL01000588	826	172.71	12	heterogeneous nuclear ribonucleoprotein d-like
OGUIISO_00824	GEFL01000587	827	143.75	10	actin-related protein 2 3 complex subunit 1b
OGUIISO_00825	GEFL01000586	821	86.88	6	---NA---
OGUIISO_00826	GEFL01000585	820	159.48	11	---NA---
OGUIISO_00827	GEFL01000584	826	2389.19	166	ribosomal protein s6
OGUIISO_00828	GEFL01000583	826	86.36	6	transmembrane emp24 domain-containing protein 10
OGUIISO_00829	GEFL01000582	824	129.85	9	---NA---
OGUIISO_00830	GEFL01000581	823	115.56	8	lim domain transcription factor lmo4
OGUIISO_00831	GEFL01000580	823	938.94	65	ribosomal protein s3a
OGUIISO_00832	GEFL01000579	810	146.77	10	sorting nexin-17
OGUIISO_00833	GEFL01000578	818	130.8	9	eno1 partial
OGUIISO_00834	GEFL01000577	819	101.61	7	---NA---
OGUIISO_00835	GEFL01000576	818	101.73	7	liprin-beta-2
OGUIISO_00836	GEFL01000575	818	87.2	6	ras-related protein rab-10
OGUIISO_00837	GEFL01000574	815	116.7	8	---NA---
OGUIISO_00838	GEFL01000573	814	131.44	9	---NA---
OGUIISO_00839	GEFL01000572	812	117.13	8	15 kda selenoprotein precursor
OGUIISO_00840	GEFL01000571	815	102.11	7	multiple egf-like-domains 6
OGUIISO_00841	GEFL01000570	814	832.48	57	peptidyl-prolyl cis-trans isomerase a-like
OGUIISO_00842	GEFL01000569	813	102.36	7	leucine-rich repeat-containing protein 59
OGUIISO_00843	GEFL01000568	814	496.57	34	ribosomal protein s13
OGUIISO_00844	GEFL01000567	812	556.35	38	ferritin heavy chain
OGUIISO_00845	GEFL01000566	811	205.22	14	sulfotransferase 1a1-like
OGUIISO_00846	GEFL01000565	812	87.85	6	sister chromatid cohesion protein pds5 homolog a
OGUIISO_00847	GEFL01000564	812	131.77	9	eukaryotic translation elongation factor 1 epsilon-1
OGUIISO_00848	GEFL01000563	807	132.58	9	zona pellucida 3 receptor
OGUIISO_00849	GEFL01000562	810	968.68	66	ribosomal protein s3
OGUIISO_00850	GEFL01000561	808	132.42	9	peptidyl-prolyl cis-trans isomerase b
OGUIISO_00851	GEFL01000560	806	132.75	9	---NA---
OGUIISO_00852	GEFL01000559	805	354.44	24	pancreatic progenitor cell differentiation and proliferation factor-like
OGUIISO_00853	GEFL01000558	803	118.44	8	id14 protein
OGUIISO_00854	GEFL01000557	803	103.63	7	annexin a6-like
OGUIISO_00855	GEFL01000556	801	1617.77	109	60s ribosomal protein l7-like
OGUIISO_00856	GEFL01000555	800	89.16	6	gdp-l-fucose synthase
OGUIISO_00857	GEFL01000554	801	74.21	5	PREDICTED: hypothetical protein LOC100427272 (Macaca mulatta hypothetical protein LOC100427272 (LOC100427272), mRNA)
OGUIISO_00858	GEFL01000553	796	134.42	9	---NA---
OGUIISO_00859	GEFL01000552	795	74.77	5	---NA---
OGUIISO_00860	GEFL01000551	798	89.39	6	signal recognition particle receptor subunit alpha isoform 1
OGUIISO_00861	GEFL01000550	796	104.55	7	---NA---
OGUIISO_00862	GEFL01000549	795	119.63	8	splicing arginine serine-rich 3
OGUIISO_00863	GEFL01000548	792	150.11	10	bridging integrator 1
OGUIISO_00864	GEFL01000547	794	209.62	14	hnrpa1 protein
OGUIISO_00865	GEFL01000546	794	254.54	17	nascent polypeptide-associated complex subunit alpha
OGUIISO_00866	GEFL01000545	787	120.85	8	ubiquitin-conjugating enzyme e2 d2
OGUIISO_00867	GEFL01000544	791	120.24	8	protein tbrg4
OGUIISO_00868	GEFL01000543	791	105.21	7	---NA---
OGUIISO_00869	GEFL01000542	793	119.93	8	dolichyl-diphosphooligosaccharide--protein glycosyltransferase subunit stt3b
OGUIISO_00870	GEFL01000541	789	105.47	7	---NA---
OGUIISO_00871	GEFL01000540	787	120.85	8	integrator complex subunit 12
OGUIISO_00872	GEFL01000539	790	270.87	18	heavy subunit
OGUIISO_00873	GEFL01000538	791	90.18	6	---NA---
OGUIISO_00874	GEFL01000537	787	90.64	6	serine threonine-protein kinase mark1
OGUIISO_00875	GEFL01000536	786	196.63	13	endoplasmic reticulum-golgi intermediate compartment protein 2
OGUIISO_00876	GEFL01000535	786	136.13	9	---NA---
OGUIISO_00877	GEFL01000534	786	75.63	5	tetratricopeptide repeat protein 28
OGUIISO_00878	GEFL01000533	779	61.04	4	---NA---
OGUIISO_00879	GEFL01000532	783	227.75	15	parvalbumin
OGUIISO_00880	GEFL01000531	785	106.01	7	sortilin isoform 2
OGUIISO_00881	GEFL01000530	781	91.33	6	transmembrane and coiled-coil domains 1
OGUIISO_00882	GEFL01000529	785	196.88	13	ferritin light partial
OGUIISO_00883	GEFL01000528	782	121.62	8	acyl- synthetase family member 2
OGUIISO_00884	GEFL01000527	783	926.17	61	phospholipase a2 inhibitor subunit gamma b-like
OGUIISO_00885	GEFL01000526	782	121.62	8	fxyd domain containing ion transport regulator 3
OGUIISO_00886	GEFL01000525	782	805.73	53	60s ribosomal protein l6-like
OGUIISO_00887	GEFL01000524	780	243.86	16	small edrk-rich factor 1
OGUIISO_00888	GEFL01000523	776	76.6	5	mitochondrial trna-specific 2-thiouridylase 1
OGUIISO_00889	GEFL01000522	780	167.66	11	ubx domain-containing protein 1
OGUIISO_00890	GEFL01000521	771	77.1	5	---NA---
OGUIISO_00891	GEFL01000520	777	168.3	11	n-acetylgalactosaminyltransferase 7-like
OGUIISO_00892	GEFL01000519	777	107.1	7	---NA---
OGUIISO_00893	GEFL01000518	772	123.2	8	---NA---
OGUIISO_00894	GEFL01000517	774	61.44	4	peptide chain release factor mitochondrial
OGUIISO_00895	GEFL01000516	773	107.66	7	---NA---
OGUIISO_00896	GEFL01000515	772	92.4	6	golgin b1
OGUIISO_00897	GEFL01000514	768	123.84	8	---NA---
OGUIISO_00898	GEFL01000513	773	169.17	11	---NA---
OGUIISO_00899	GEFL01000512	771	123.36	8	tax1-binding protein 1 homolog
OGUIISO_00900	GEFL01000511	768	170.28	11	---NA---
OGUIISO_00901	GEFL01000510	771	92.52	6	constitutive coactivator of ppar-gamma-like protein 1-like
OGUIISO_00902	GEFL01000509	774	107.52	7	gdnf family receptor alpha-4-like
OGUIISO_00903	GEFL01000508	767	108.5	7	upf0663 transmembrane protein c17orf28 homolog
OGUIISO_00904	GEFL01000507	762	93.61	6	la-related protein 7
OGUIISO_00905	GEFL01000506	764	140.05	9	prosaposin
OGUIISO_00906	GEFL01000505	767	217	14	eukaryotic translation initiation factor 3 subunit k
OGUIISO_00907	GEFL01000504	765	93.24	6	interleukin-18
OGUIISO_00908	GEFL01000503	763	77.91	5	high density lipoprotein binding protein
OGUIISO_00909	GEFL01000502	759	187.96	12	cathepsin l1 precursor
OGUIISO_00910	GEFL01000501	763	545.34	35	60s ribosomal protein l12
OGUIISO_00911	GEFL01000500	752	94.85	6	---NA---
OGUIISO_00912	GEFL01000499	760	125.14	8	---NA---
OGUIISO_00913	GEFL01000498	759	93.98	6	u2 small nuclear rna auxiliary factor 2
OGUIISO_00914	GEFL01000497	756	94.35	6	snake venom metalloprotease
OGUIISO_00915	GEFL01000496	758	125.47	8	beta-keratin-like protein
OGUIISO_00916	GEFL01000495	752	94.85	6	unconventional myosin-ic
OGUIISO_00917	GEFL01000494	750	142.66	9	---NA---
OGUIISO_00918	GEFL01000493	755	110.22	7	structural maintenance of chromosomes protein 1a
OGUIISO_00919	GEFL01000492	754	110.37	7	dihydrolipoyl mitochondrial
OGUIISO_00920	GEFL01000491	749	142.85	9	---NA---
OGUIISO_00921	GEFL01000490	744	111.85	7	---NA---
OGUIISO_00922	GEFL01000489	742	80.11	5	---NA---
OGUIISO_00923	GEFL01000488	745	111.7	7	ubx domain-containing protein 4-like
OGUIISO_00924	GEFL01000487	744	175.77	11	heat shock cognate 71 kda protein isoform 2
OGUIISO_00925	GEFL01000486	739	96.52	6	guanylate cyclase soluble subunit alpha-3
OGUIISO_00926	GEFL01000485	735	129.4	8	---NA---
OGUIISO_00927	GEFL01000484	740	96.39	6	---NA---
OGUIISO_00928	GEFL01000483	737	80.65	5	insulin induced gene 1
OGUIISO_00929	GEFL01000482	738	112.76	7	---NA---
OGUIISO_00930	GEFL01000481	740	96.39	6	syntaxin binding protein 2
OGUIISO_00931	GEFL01000480	737	161.31	10	---NA---
OGUIISO_00932	GEFL01000479	737	112.92	7	cdc42 effector protein 1
OGUIISO_00933	GEFL01000478	736	80.76	5	---NA---
OGUIISO_00934	GEFL01000477	734	113.38	7	stearoyl- desaturase (delta-9-desaturase)
OGUIISO_00935	GEFL01000476	734	161.97	10	transcription factor btf3
OGUIISO_00936	GEFL01000475	731	97.58	6	transmembrane protein 87a-like
OGUIISO_00937	GEFL01000474	731	130.11	8	---NA---
OGUIISO_00938	GEFL01000473	733	129.75	8	---NA---
OGUIISO_00939	GEFL01000472	732	568.43	35	---NA---
OGUIISO_00940	GEFL01000471	730	114	7	serine threonine-protein phosphatase 2b catalytic subunit gamma isoform
OGUIISO_00941	GEFL01000470	727	98.12	6	fumarylacetoacetate hydrolase domain-containing protein 2a
OGUIISO_00942	GEFL01000469	728	65.32	4	---NA---
OGUIISO_00943	GEFL01000468	729	114.15	7	mgc86483 protein
OGUIISO_00944	GEFL01000467	729	212	13	pol- partial
OGUIISO_00945	GEFL01000466	730	1433.12	88	ribosomal protein l10
OGUIISO_00946	GEFL01000465	723	82.22	5	alkaline phosphatase
OGUIISO_00947	GEFL01000464	720	99.07	6	---NA---
OGUIISO_00948	GEFL01000463	722	82.33	5	---NA---
OGUIISO_00949	GEFL01000462	723	115.1	7	non-receptor tyrosine-protein kinase tyk2
OGUIISO_00950	GEFL01000461	723	476.85	29	elongation factor 1-beta
OGUIISO_00951	GEFL01000460	723	98.66	6	snake venom metalloprotease
OGUIISO_00952	GEFL01000459	718	198.69	12	---NA---
OGUIISO_00953	GEFL01000458	718	66.23	4	calsequestrin-1 precursor
OGUIISO_00954	GEFL01000457	721	98.93	6	phosphoribosylaminoimidazole phosphoribosylaminoimidazole succinocarboxamide synthetase
OGUIISO_00955	GEFL01000456	716	83.02	5	catenin alpha-1 isoform 2
OGUIISO_00956	GEFL01000455	722	115.26	7	---NA---
OGUIISO_00957	GEFL01000454	721	164.89	10	reverse transcriptase-like protein
OGUIISO_00958	GEFL01000453	717	66.32	4	---NA---
OGUIISO_00959	GEFL01000452	718	99.35	6	---NA---
OGUIISO_00960	GEFL01000451	716	99.62	6	wd repeat and fyve domain-containing protein 2
OGUIISO_00961	GEFL01000450	717	99.48	6	---NA---
OGUIISO_00962	GEFL01000449	712	83.49	5	ogdh protein
OGUIISO_00963	GEFL01000448	717	630.07	38	ribosomal protein s9
OGUIISO_00964	GEFL01000447	717	82.9	5	---NA---
OGUIISO_00965	GEFL01000446	715	133.02	8	---NA---
OGUIISO_00966	GEFL01000445	716	99.62	6	proteasome (macropain) 26s non- 2
OGUIISO_00967	GEFL01000444	714	549.46	33	ribosomal protein l9
OGUIISO_00968	GEFL01000443	714	1248.78	75	ribosomal protein l13
OGUIISO_00969	GEFL01000442	714	183.15	11	beta- partial
OGUIISO_00970	GEFL01000441	713	200.08	12	multifunctional protein ade2
OGUIISO_00971	GEFL01000440	710	184.19	11	heterogeneous nuclear ribonucleoprotein h-like
OGUIISO_00972	GEFL01000439	710	100.47	6	beta-hexosaminidase subunit alpha
OGUIISO_00973	GEFL01000438	711	100.32	6	peptidyl-prolyl cis-trans isomerase-like 3
OGUIISO_00974	GEFL01000437	712	267.15	16	zinc transporter zip13
OGUIISO_00975	GEFL01000436	710	117.21	7	protein yipf2-like
OGUIISO_00976	GEFL01000435	707	117.71	7	---NA---
OGUIISO_00977	GEFL01000434	708	117.54	7	creatine kinase m-type
OGUIISO_00978	GEFL01000433	703	152.2	9	methylmalonate-semialdehyde dehydrogenase
OGUIISO_00979	GEFL01000432	702	101.61	6	gtp-binding protein
OGUIISO_00980	GEFL01000431	704	151.98	9	ras gtpase-activating-like protein iqgap1
OGUIISO_00981	GEFL01000430	704	101.32	6	upf0160 protein mitochondrial-like
OGUIISO_00982	GEFL01000429	704	84.43	5	---NA---
OGUIISO_00983	GEFL01000428	705	168.63	10	---NA---
OGUIISO_00984	GEFL01000427	704	810.57	48	ubiquitin a-52 residue ribosomal protein fusion product 1
OGUIISO_00985	GEFL01000426	703	152.2	9	---NA---
OGUIISO_00986	GEFL01000425	702	101.61	6	daz-associated protein 2
OGUIISO_00987	GEFL01000424	701	203.51	12	cytochrome c oxydase subunit 4
OGUIISO_00988	GEFL01000423	702	118.55	7	v-type proton atpase 21 kda proteolipid subunit-like
OGUIISO_00989	GEFL01000422	701	152.63	9	signal peptidase complex subunit 2
OGUIISO_00990	GEFL01000421	698	1141.15	67	venom c-type lectin mannose binding isoform 3
OGUIISO_00991	GEFL01000420	695	153.95	9	---NA---
OGUIISO_00992	GEFL01000419	695	307.9	18	thioredoxin
OGUIISO_00993	GEFL01000418	693	120.08	7	arginine serine-rich coiled-coil protein 2
OGUIISO_00994	GEFL01000417	691	189.25	11	glutathione s-transferase mu 3
OGUIISO_00995	GEFL01000416	689	310.58	18	atp synthase lipid-binding mitochondrial-like
OGUIISO_00996	GEFL01000415	689	103.53	6	pre-mrna-processing-splicing factor 8
OGUIISO_00997	GEFL01000414	688	120.96	7	secretory carrier-associated membrane protein 2
OGUIISO_00998	GEFL01000413	686	103.98	6	chromosome 21 open reading frame 59
OGUIISO_00999	GEFL01000412	689	103.53	6	---NA---
OGUIISO_01000	GEFL01000411	685	121.49	7	sphingomyelin phosphodiesterase isoform 1
OGUIISO_01001	GEFL01000410	680	122.38	7	calmin delta
OGUIISO_01002	GEFL01000409	685	86.78	5	a chain tricyclic series of hsp90 inhibitors
OGUIISO_01003	GEFL01000408	686	225.29	13	eukaryotic translation initiation factor x-chromosomal
OGUIISO_01004	GEFL01000407	685	86.78	5	---NA---
OGUIISO_01005	GEFL01000406	684	1512.12	87	ribosomal protein l15
OGUIISO_01006	GEFL01000405	682	69.73	4	sodium- and chloride-dependent taurine transporter-like
OGUIISO_01007	GEFL01000404	683	156.66	9	---NA---
OGUIISO_01008	GEFL01000403	684	260.71	15	---NA---
OGUIISO_01009	GEFL01000402	681	663.37	38	40s ribosomal protein s5
OGUIISO_01010	GEFL01000401	677	105.36	6	---NA---
OGUIISO_01011	GEFL01000400	675	88.06	5	eukaryotic translation initiation factor 3 subunit j
OGUIISO_01012	GEFL01000399	679	1348.17	77	ribosomal protein l13a
OGUIISO_01013	GEFL01000398	679	87.54	5	ocia domain-containing protein 1 isoform 1
OGUIISO_01014	GEFL01000397	675	123.29	7	eukaryotic translation initiation factor 3 subunit h
OGUIISO_01015	GEFL01000396	676	140.69	8	serine arginine-rich splicing factor 6 isoform 2
OGUIISO_01016	GEFL01000395	677	105.36	6	---NA---
OGUIISO_01017	GEFL01000394	679	157.58	9	nadh dehydrogenase
OGUIISO_01018	GEFL01000393	678	122.74	7	---NA---
OGUIISO_01019	GEFL01000392	677	105.36	6	coiled-coil domain-containing protein 9-like
OGUIISO_01020	GEFL01000391	678	175.34	10	proteasome maturation protein
OGUIISO_01021	GEFL01000390	674	123.47	7	rna-directed dna polymerase from mobile element jockey-like
OGUIISO_01022	GEFL01000389	676	369.31	21	40s ribosomal protein s25
OGUIISO_01023	GEFL01000388	676	105.52	6	---NA---
OGUIISO_01024	GEFL01000387	675	105.67	6	palmitoyl-protein thioesterase 2
OGUIISO_01025	GEFL01000386	674	123.47	7	double-stranded rna-binding protein staufen homolog 1
OGUIISO_01026	GEFL01000385	673	141.32	8	---NA---
OGUIISO_01027	GEFL01000384	669	106.62	6	ensconsin isoform 1
OGUIISO_01028	GEFL01000383	674	158.75	9	-dihydroxyvitamin d 24- mitochondrial-like
OGUIISO_01029	GEFL01000382	672	53.07	3	atp-binding sub-family d member 3
OGUIISO_01030	GEFL01000381	672	176.91	10	---NA---
OGUIISO_01031	GEFL01000380	669	106.62	6	PREDICTED: hypothetical protein LOC100488659 (Xenopus (Silurana) tropicalis hypothetical protein LOC100488659 (LOC100488659), mRNA)
OGUIISO_01032	GEFL01000379	669	106.62	6	sec31a protein
OGUIISO_01033	GEFL01000378	670	230.67	13	---NA---
OGUIISO_01034	GEFL01000377	668	427.13	24	lysozyme milk isozyme-like
OGUIISO_01035	GEFL01000376	667	124.77	7	---NA---
OGUIISO_01036	GEFL01000375	660	108.08	6	cytoplasmic fmr1 interacting protein 1
OGUIISO_01037	GEFL01000374	667	178.24	10	atp h+ mitochondrial f1 delta subunit
OGUIISO_01038	GEFL01000373	658	126.47	7	cystatin precursor
OGUIISO_01039	GEFL01000372	664	232.75	13	lipocalin-type prostaglandin d synthase
OGUIISO_01040	GEFL01000371	660	126.09	7	---NA---
OGUIISO_01041	GEFL01000370	662	879.96	49	40s ribosomal protein s8
OGUIISO_01042	GEFL01000369	659	126.28	7	histone
OGUIISO_01043	GEFL01000368	661	125.9	7	---NA---
OGUIISO_01044	GEFL01000367	657	162.85	9	hydroxyacyl-coenzyme a mitochondrial-like
OGUIISO_01045	GEFL01000366	656	126.86	7	peroxiredoxin 3
OGUIISO_01046	GEFL01000365	657	488.56	27	40s ribosomal protein s14
OGUIISO_01047	GEFL01000364	658	90.34	5	map microtubule affinity-regulating kinase 4
OGUIISO_01048	GEFL01000363	655	326.7	18	---NA---
OGUIISO_01049	GEFL01000362	649	128.23	7	prenylcysteine oxidase-like
OGUIISO_01050	GEFL01000361	653	145.65	8	dnaj homolog subfamily a member 2
OGUIISO_01051	GEFL01000360	653	91.03	5	ubiquitin carboxyl-terminal hydrolase 36
OGUIISO_01052	GEFL01000359	650	109.74	6	choline transporter-like protein 4
OGUIISO_01053	GEFL01000358	651	109.57	6	inorganic pyrophosphatase
OGUIISO_01054	GEFL01000357	649	201.5	11	---NA---
OGUIISO_01055	GEFL01000356	651	109.57	6	heat shock 70kda protein 2
OGUIISO_01056	GEFL01000355	651	109.57	6	anterior gradient protein 2 homolog isoform 2
OGUIISO_01057	GEFL01000354	653	182.06	10	capping protein (actin filament) muscle z- beta
OGUIISO_01058	GEFL01000353	650	146.32	8	tlc domain containing 1
OGUIISO_01059	GEFL01000352	645	129.02	7	quinoid dihydropteridine reductase
OGUIISO_01060	GEFL01000351	649	146.54	8	f-box protein 9
OGUIISO_01061	GEFL01000350	649	91.59	5	dual specificity protein phosphatase 13-like
OGUIISO_01062	GEFL01000349	645	110.59	6	---NA---
OGUIISO_01063	GEFL01000348	647	220.5	12	---NA---
OGUIISO_01064	GEFL01000347	648	183.46	10	neural proliferation differentiation and control protein 1
OGUIISO_01065	GEFL01000346	645	92.16	5	---NA---
OGUIISO_01066	GEFL01000345	646	92.02	5	transposon ty3-g gag-pol poly
OGUIISO_01067	GEFL01000344	647	165.37	9	myosin light chain 4
OGUIISO_01068	GEFL01000343	647	110.25	6	---NA---
OGUIISO_01069	GEFL01000342	646	110.42	6	---NA---
OGUIISO_01070	GEFL01000341	644	110.76	6	---NA---
OGUIISO_01071	GEFL01000340	646	147.22	8	nucleolar gtp-binding protein 1
OGUIISO_01072	GEFL01000339	645	258.04	14	---NA---
OGUIISO_01073	GEFL01000338	643	110.93	6	pumilio homolog 1
OGUIISO_01074	GEFL01000337	642	203.69	11	---NA---
OGUIISO_01075	GEFL01000336	641	111.28	6	78 kda glucose-regulated protein
OGUIISO_01076	GEFL01000335	641	185.47	10	---NA---
OGUIISO_01077	GEFL01000334	642	111.11	6	---NA---
OGUIISO_01078	GEFL01000333	644	110.76	6	---NA---
OGUIISO_01079	GEFL01000332	640	92.88	5	reverse transcriptase-like protein
OGUIISO_01080	GEFL01000331	637	74.65	4	sphingomyelin phosphodiesterase isoform 2
OGUIISO_01081	GEFL01000330	639	111.63	6	---NA---
OGUIISO_01082	GEFL01000329	637	93.32	5	major facilitator superfamily domain-containing protein 7
OGUIISO_01083	GEFL01000328	636	93.46	5	tbc1 domain family member 8
OGUIISO_01084	GEFL01000327	635	74.89	4	nucleic acid binding protein
OGUIISO_01085	GEFL01000326	633	300.5	16	vm3_najat ame: full=zinc metalloproteinase-disintegrin ame: full=snake venom metalloproteinase short=svmp flags: precursor
OGUIISO_01086	GEFL01000325	632	282.16	15	PREDICTED: hypothetical protein
OGUIISO_01087	GEFL01000324	629	113.4	6	PREDICTED: hypothetical protein LOC100565762
OGUIISO_01088	GEFL01000323	624	114.31	6	---NA---
OGUIISO_01089	GEFL01000322	630	94.35	5	synaptophysin-like protein 1-like
OGUIISO_01090	GEFL01000321	630	94.35	5	---NA---
OGUIISO_01091	GEFL01000320	627	94.8	5	h2a histone member v
OGUIISO_01092	GEFL01000319	629	132.3	7	39s ribosomal protein mitochondrial
OGUIISO_01093	GEFL01000318	628	1116.9	59	ribosomal protein s7
OGUIISO_01094	GEFL01000317	627	151.69	8	kinectin isoform 1
OGUIISO_01095	GEFL01000316	626	113.95	6	protein tyrosine non-receptor type 2
OGUIISO_01096	GEFL01000315	628	113.58	6	mucin oligomeric mucus gel-forming
OGUIISO_01097	GEFL01000314	622	172.02	9	---NA---
OGUIISO_01098	GEFL01000313	622	114.68	6	kif1-binding protein
OGUIISO_01099	GEFL01000312	624	1352.68	71	ribosomal protein l17
OGUIISO_01100	GEFL01000311	623	209.91	11	60s ribosomal protein l31-like
OGUIISO_01101	GEFL01000310	622	592.51	31	peptidyl-prolyl cis-trans isomerase fkbp11-like
OGUIISO_01102	GEFL01000309	622	172.02	9	kiaa1191
OGUIISO_01103	GEFL01000308	620	76.7	4	beta-keratin-like protein
OGUIISO_01104	GEFL01000307	618	115.42	6	2-oxoisovalerate dehydrogenase subunit mitochondrial
OGUIISO_01105	GEFL01000306	620	76.7	4	---NA---
OGUIISO_01106	GEFL01000305	619	134.44	7	---NA---
OGUIISO_01107	GEFL01000304	618	230.84	12	---NA---
OGUIISO_01108	GEFL01000303	611	194.57	10	profilin 1
OGUIISO_01109	GEFL01000302	620	210.92	11	transmembrane emp24 domain-containing protein 7 precursor
OGUIISO_01110	GEFL01000301	0	1353.15	70	group iie secretory phospholipase a2
OGUIISO_01111	GEFL01000300	614	135.54	7	amino-terminal enhancer of split
OGUIISO_01112	GEFL01000299	612	116.55	6	myosin regulatory light polypeptide 9-like isoform 1
OGUIISO_01113	GEFL01000298	614	116.17	6	v-type proton atpase 116 kda subunit a isoform 2
OGUIISO_01114	GEFL01000297	612	116.55	6	rna polymerase ii elongation factor ell2
OGUIISO_01115	GEFL01000296	612	252.53	13	---NA---
OGUIISO_01116	GEFL01000295	613	116.36	6	nucleobindin-2
OGUIISO_01117	GEFL01000294	607	215.44	11	splicing factor 3b subunit 1
OGUIISO_01118	GEFL01000293	612	116.55	6	ubiquitin-conjugating enzyme e2g 2
OGUIISO_01119	GEFL01000292	611	97.29	5	crk-like protein
OGUIISO_01120	GEFL01000291	611	330.77	17	wap four-disulfide core domain protein 2
OGUIISO_01121	GEFL01000290	614	251.71	13	tmsb4x protein
OGUIISO_01122	GEFL01000289	613	155.15	8	---NA---
OGUIISO_01123	GEFL01000288	606	98.09	5	alpha-aminoadipic semialdehyde dehydrogenase
OGUIISO_01124	GEFL01000287	610	116.93	6	upf0663 transmembrane protein c17orf28 homolog
OGUIISO_01125	GEFL01000286	608	117.32	6	atp-binding cassette sub-family a member 2
OGUIISO_01126	GEFL01000285	608	136.87	7	monocarboxylate transporter 1
OGUIISO_01127	GEFL01000284	607	97.93	5	---NA---
OGUIISO_01128	GEFL01000283	604	137.78	7	---NA---
OGUIISO_01129	GEFL01000282	603	157.72	8	---NA---
OGUIISO_01130	GEFL01000281	602	236.98	12	ribosomal protein l10a
OGUIISO_01131	GEFL01000280	603	118.29	6	eukaryotic elongation factor 2 kinase
OGUIISO_01132	GEFL01000279	602	98.74	5	actin-related protein 2 3 complex subunit 3
OGUIISO_01133	GEFL01000278	603	197.15	10	interleukin enhancer-binding factor 3 isoform 3
OGUIISO_01134	GEFL01000277	598	178.92	9	transcription factor hes-1
OGUIISO_01135	GEFL01000276	599	119.08	6	syntaxin-binding protein 2
OGUIISO_01136	GEFL01000275	592	80.33	4	---NA---
OGUIISO_01137	GEFL01000274	591	100.58	5	caspase-7
OGUIISO_01138	GEFL01000273	596	179.52	9	---NA---
OGUIISO_01139	GEFL01000272	594	140.1	7	---NA---
OGUIISO_01140	GEFL01000271	594	160.11	8	cyclic amp-dependent transcription factor atf-4
OGUIISO_01141	GEFL01000270	595	259.75	13	mitochondrial atp synthase f0 complex subunit c isoform 3
OGUIISO_01142	GEFL01000269	595	119.88	6	nadh dehydrogenase
OGUIISO_01143	GEFL01000268	593	120.29	6	---NA---
OGUIISO_01144	GEFL01000267	594	680.48	34	60s ribosomal protein l18
OGUIISO_01145	GEFL01000266	592	220.9	11	ribosomal protein l18a
OGUIISO_01146	GEFL01000265	593	120.29	6	microprocessor complex subunit dgcr8
OGUIISO_01147	GEFL01000264	593	160.38	8	ras-related protein rab-2a
OGUIISO_01148	GEFL01000263	593	100.24	5	gpi mannosyltransferase 2
OGUIISO_01149	GEFL01000262	586	121.72	6	annexin a11
OGUIISO_01150	GEFL01000261	589	80.74	4	---NA---
OGUIISO_01151	GEFL01000260	586	121.72	6	protein dopey-2
OGUIISO_01152	GEFL01000259	587	60.76	3	regulation of nuclear pre-mrna domain-containing protein 1b
OGUIISO_01153	GEFL01000258	586	81.15	4	---NA---
OGUIISO_01154	GEFL01000257	586	101.44	5	---NA---
OGUIISO_01155	GEFL01000256	587	263.29	13	fk506 binding protein 13kda
OGUIISO_01156	GEFL01000255	585	121.93	6	---NA---
OGUIISO_01157	GEFL01000254	585	81.29	4	subfamily member 11
OGUIISO_01158	GEFL01000253	580	163.98	8	fructose- -bisphosphatase 1
OGUIISO_01159	GEFL01000252	583	163.13	8	histone
OGUIISO_01160	GEFL01000251	579	205.33	10	x-box-binding protein 1 isoform xbp1
OGUIISO_01161	GEFL01000250	581	634.32	31	60s ribosomal protein l23a-like
OGUIISO_01162	GEFL01000249	581	81.85	4	heat shock 70kda protein 9
OGUIISO_01163	GEFL01000248	578	226.25	11	---NA---
OGUIISO_01164	GEFL01000247	578	123.41	6	calumenin isoform 3
OGUIISO_01165	GEFL01000246	577	103.02	5	upstream stimulatory factor 1 isoform 1
OGUIISO_01166	GEFL01000245	572	103.92	5	nudc domain-containing protein 2
OGUIISO_01167	GEFL01000244	574	103.56	5	immunoglobulin lambda light chain
OGUIISO_01168	GEFL01000243	574	144.98	7	tudor domain-containing protein 1-like
OGUIISO_01169	GEFL01000242	573	497.94	24	protein transport protein sec61 subunit beta
OGUIISO_01170	GEFL01000241	577	412.08	20	---NA---
OGUIISO_01171	GEFL01000240	570	146	7	PREDICTED: hypothetical protein LOC100552488
OGUIISO_01172	GEFL01000239	570	187.71	9	nadh dehydrogenase
OGUIISO_01173	GEFL01000238	564	126.47	6	---NA---
OGUIISO_01174	GEFL01000237	567	125.8	6	---NA---
OGUIISO_01175	GEFL01000236	567	125.8	6	glutaredoxin-1
OGUIISO_01176	GEFL01000235	566	147.03	7	182 kda tankyrase-1-binding
OGUIISO_01177	GEFL01000234	566	189.04	9	cold shock domain-containing protein e1 isoform 1
OGUIISO_01178	GEFL01000233	562	232.69	11	3-hydroxyacyl- dehydratase 2
OGUIISO_01179	GEFL01000232	562	126.92	6	---NA---
OGUIISO_01180	GEFL01000231	563	126.7	6	chromosome 4 open reading frame 34
OGUIISO_01181	GEFL01000230	562	105.77	5	reverse transcriptase-like protein
OGUIISO_01182	GEFL01000229	563	274.51	13	splicing arginine serine-rich 6
OGUIISO_01183	GEFL01000228	562	84.61	4	phosphatidylethanolamine-binding protein 4
OGUIISO_01184	GEFL01000227	563	126.7	6	---NA---
OGUIISO_01185	GEFL01000226	560	106.15	5	---NA---
OGUIISO_01186	GEFL01000225	559	148.87	7	loc733321 protein
OGUIISO_01187	GEFL01000224	559	106.34	5	pin2 terf1-interacting telomerase inhibitor 1
OGUIISO_01188	GEFL01000223	558	106.53	5	26s protease regulatory subunit 7
OGUIISO_01189	GEFL01000222	559	106.34	5	---NA---
OGUIISO_01190	GEFL01000221	558	170.44	8	---NA---
OGUIISO_01191	GEFL01000220	557	170.75	8	eukaryotic translation initiation factor 5a-1
OGUIISO_01192	GEFL01000219	556	149.67	7	tsc22 domain family protein 4
OGUIISO_01193	GEFL01000218	555	192.78	9	---NA---
OGUIISO_01194	GEFL01000217	552	150.76	7	---NA---
OGUIISO_01195	GEFL01000216	552	236.91	11	triosephosphate isomerase
OGUIISO_01196	GEFL01000215	553	515.95	24	40s ribosomal protein s10
OGUIISO_01197	GEFL01000214	553	107.49	5	hiv tat-specific factor 1 homolog
OGUIISO_01198	GEFL01000213	547	108.67	5	nedd8-conjugating enzyme ube2f
OGUIISO_01199	GEFL01000212	552	107.68	5	type i cytoskeletal 15
OGUIISO_01200	GEFL01000211	550	151.31	7	ring finger protein 181
OGUIISO_01201	GEFL01000210	550	237.77	11	protein s100-a10
OGUIISO_01202	GEFL01000209	549	129.93	6	---NA---
OGUIISO_01203	GEFL01000208	548	260.33	12	---NA---
OGUIISO_01204	GEFL01000207	546	152.42	7	a chain l-ficolin complexed to n-acetyl-cystein
OGUIISO_01205	GEFL01000206	543	87.58	4	---NA---
OGUIISO_01206	GEFL01000205	548	173.55	8	u6 snrna-associated sm-like protein lsm5
OGUIISO_01207	GEFL01000204	547	1151.89	53	ribosomal protein l11
OGUIISO_01208	GEFL01000203	546	130.64	6	60s ribosomal protein l36a-like
OGUIISO_01209	GEFL01000202	546	130.64	6	reverse transcriptase family protein
OGUIISO_01210	GEFL01000201	544	65.56	3	villin-like partial
OGUIISO_01211	GEFL01000200	545	218.14	10	---NA---
OGUIISO_01212	GEFL01000199	542	153.54	7	---NA---
OGUIISO_01213	GEFL01000198	545	283.58	13	g-rich rna sequence binding factor 1
OGUIISO_01214	GEFL01000197	546	413.7	19	40s ribosomal protein s27
OGUIISO_01215	GEFL01000196	543	328.41	15	venom c-type lectin mannose binding isoform 3
OGUIISO_01216	GEFL01000195	542	372.88	17	ribosomal protein l21
OGUIISO_01217	GEFL01000194	542	153.54	7	---NA---
OGUIISO_01218	GEFL01000193	542	109.67	5	---NA---
OGUIISO_01219	GEFL01000192	541	153.82	7	eukaryotic translation initiation factor 2 subunit 3
OGUIISO_01220	GEFL01000191	537	132.83	6	---NA---
OGUIISO_01221	GEFL01000190	539	154.39	7	---NA---
OGUIISO_01222	GEFL01000189	540	154.11	7	succinyl- ligase
OGUIISO_01223	GEFL01000188	535	88.89	4	f-actin-capping protein subunit alpha-1
OGUIISO_01224	GEFL01000187	538	132.58	6	---NA---
OGUIISO_01225	GEFL01000186	538	132.58	6	---NA---
OGUIISO_01226	GEFL01000185	536	199.62	9	t-complex protein 1 subunit theta
OGUIISO_01227	GEFL01000184	535	244.43	11	ribosomal protein l24
OGUIISO_01228	GEFL01000183	535	155.55	7	---NA---
OGUIISO_01229	GEFL01000182	534	155.84	7	fxyd domain-containing ion transport regulator 5-like
OGUIISO_01230	GEFL01000181	535	199.99	9	zinc finger protein 113
OGUIISO_01231	GEFL01000180	532	156.43	7	---NA---
OGUIISO_01232	GEFL01000179	532	89.39	4	---NA---
OGUIISO_01233	GEFL01000178	526	113.01	5	zinc finger protein 182
OGUIISO_01234	GEFL01000177	530	112.15	5	nucleotide exchange factor sil1
OGUIISO_01235	GEFL01000176	532	223.47	10	---NA---
OGUIISO_01236	GEFL01000175	529	89.89	4	transmembrane protein 214-like
OGUIISO_01237	GEFL01000174	527	293.26	13	---NA---
OGUIISO_01238	GEFL01000173	528	135.1	6	poly rna mitochondrial
OGUIISO_01239	GEFL01000172	526	158.21	7	tpa_inf: sialidase
OGUIISO_01240	GEFL01000171	527	225.59	10	---NA---
OGUIISO_01241	GEFL01000170	526	158.21	7	---NA---
OGUIISO_01242	GEFL01000169	528	180.13	8	---NA---
OGUIISO_01243	GEFL01000168	526	361.62	16	ribosomal protein s11
OGUIISO_01244	GEFL01000167	525	135.87	6	saccharopine dehydrogenase
OGUIISO_01245	GEFL01000166	527	180.47	8	---NA---
OGUIISO_01246	GEFL01000165	524	181.5	8	---NA---
OGUIISO_01247	GEFL01000164	518	206.55	9	---NA---
OGUIISO_01248	GEFL01000163	523	159.12	7	---NA---
OGUIISO_01249	GEFL01000162	522	136.65	6	---NA---
OGUIISO_01250	GEFL01000161	520	160.04	7	transcription factor btf3 homolog 4
OGUIISO_01251	GEFL01000160	521	182.55	8	---NA---
OGUIISO_01252	GEFL01000159	519	68.72	3	reverse transcriptase-like protein
OGUIISO_01253	GEFL01000158	518	229.51	10	---NA---
OGUIISO_01254	GEFL01000157	517	114.97	5	---NA---
OGUIISO_01255	GEFL01000156	519	183.25	8	mucin-16- partial
OGUIISO_01256	GEFL01000155	517	114.97	5	dna-directed rna polymerase ii subunit rpb1
OGUIISO_01257	GEFL01000154	517	137.97	6	v-type proton atpase subunit e 1
OGUIISO_01258	GEFL01000153	518	183.6	8	---NA---
OGUIISO_01259	GEFL01000152	515	161.59	7	60s ribosomal protein l37-like
OGUIISO_01260	GEFL01000151	516	138.24	6	f-box wd repeat-containing protein 4
OGUIISO_01261	GEFL01000150	516	138.24	6	perq amino acid-rich with gyf domain-containing protein 2 isoform b
OGUIISO_01262	GEFL01000149	517	160.96	7	mitochondrial cytochrome c oxidase subunit va
OGUIISO_01263	GEFL01000148	517	229.95	10	dynein light chain roadblock-type 2
OGUIISO_01264	GEFL01000147	515	138.51	6	heterogeneous nuclear ribonucleoprotein h
OGUIISO_01265	GEFL01000146	518	160.65	7	ribosomal l24 domain containing 1
OGUIISO_01266	GEFL01000145	516	345.59	15	40s ribosomal protein s18
OGUIISO_01267	GEFL01000144	515	115.42	5	chromosome 16 open reading frame 42
OGUIISO_01268	GEFL01000143	515	161.59	7	antithrombin-iii precursor
OGUIISO_01269	GEFL01000142	509	140.14	6	---NA---
OGUIISO_01270	GEFL01000141	513	115.87	5	---NA---
OGUIISO_01271	GEFL01000140	513	139.05	6	er lipid raft associated 1
OGUIISO_01272	GEFL01000139	511	69.79	3	rna-directed dna polymerase from mobile element jockey-like
OGUIISO_01273	GEFL01000138	512	139.32	6	---NA---
OGUIISO_01274	GEFL01000137	512	208.98	9	---NA---
OGUIISO_01275	GEFL01000136	509	116.78	5	zinc transporter zip6-like
OGUIISO_01276	GEFL01000135	512	139.32	6	---NA---
OGUIISO_01277	GEFL01000134	510	139.86	6	brother of cdo
OGUIISO_01278	GEFL01000133	509	116.78	5	cop9 signalosome complex subunit 4
OGUIISO_01279	GEFL01000132	505	141.25	6	---NA---
OGUIISO_01280	GEFL01000131	508	117.01	5	proteasome subunit beta type-6
OGUIISO_01281	GEFL01000130	508	117.01	5	phosphotidylinositol phosphatase ptprq-like
OGUIISO_01282	GEFL01000129	508	140.41	6	---NA---
OGUIISO_01283	GEFL01000128	508	491.45	21	ubiquitin-like protein fubi
OGUIISO_01284	GEFL01000127	506	140.97	6	---NA---
OGUIISO_01285	GEFL01000126	510	139.86	6	dolichyl-diphosphooligosaccharide--protein glycosyltransferase 48 kda subunit
OGUIISO_01286	GEFL01000125	504	141.53	6	brefeldin a-inhibited guanine nucleotide-exchange protein 2
OGUIISO_01287	GEFL01000124	507	117.24	5	p31 beta subunit
OGUIISO_01288	GEFL01000123	505	94.17	4	complement factor d
OGUIISO_01289	GEFL01000122	504	141.53	6	---NA---
OGUIISO_01290	GEFL01000121	507	140.69	6	---NA---
OGUIISO_01291	GEFL01000120	504	448.17	19	60s ribosomal protein l26-like
OGUIISO_01292	GEFL01000119	499	142.95	6	dolichyl-diphosphooligosaccharide--protein glycosyltransferase subunit stt3a-like
OGUIISO_01293	GEFL01000118	500	142.66	6	---NA---
OGUIISO_01294	GEFL01000117	503	12952	548	---NA---
OGUIISO_01295	GEFL01000116	496	95.87	4	---NA---
OGUIISO_01296	GEFL01000115	501	94.92	4	probable e3 ubiquitin-protein ligase makorin-2
OGUIISO_01297	GEFL01000114	501	142.38	6	---NA---
OGUIISO_01298	GEFL01000113	500	118.88	5	delta-aminolevulinic acid dehydratase
OGUIISO_01299	GEFL01000112	499	333.54	14	60s ribosomal protein l14-like
OGUIISO_01300	GEFL01000111	500	166.44	7	afadin
OGUIISO_01301	GEFL01000110	499	142.95	6	chromodomain-helicase-dna-binding protein 4
OGUIISO_01302	GEFL01000109	490	145.57	6	tia1 cytotoxic granule-associated rna binding protein
OGUIISO_01303	GEFL01000108	498	286.47	12	cytochrome c oxidase subunit vb
OGUIISO_01304	GEFL01000107	497	119.6	5	ccr4-not transcription complex subunit 8
OGUIISO_01305	GEFL01000106	495	168.12	7	epithelial cell adhesion molecule
OGUIISO_01306	GEFL01000105	492	144.98	6	probable atp-dependent rna helicase dhx36 isoform 2
OGUIISO_01307	GEFL01000104	495	192.14	8	40s ribosomal protein s16
OGUIISO_01308	GEFL01000103	494	120.33	5	ubiquitin-conjugating enzyme e2 d3
OGUIISO_01309	GEFL01000102	494	144.39	6	---NA---
OGUIISO_01310	GEFL01000101	494	144.39	6	low density lipoprotein receptor-related protein associated protein 1
OGUIISO_01311	GEFL01000100	494	144.39	6	transcription elongation factor b polypeptide 2-like
OGUIISO_01312	GEFL01000099	492	96.65	4	sortilin 1
OGUIISO_01313	GEFL01000098	490	121.31	5	run and fyve domain containing 1
OGUIISO_01314	GEFL01000097	492	193.31	8	protein elys
OGUIISO_01315	GEFL01000096	491	145.28	6	---NA---
OGUIISO_01316	GEFL01000095	490	121.31	5	zinc finger and btb domain-containing protein 46
OGUIISO_01317	GEFL01000094	490	145.57	6	plectin isoform 1hij
OGUIISO_01318	GEFL01000093	489	194.49	8	von hippel-lindau disease tumor suppressor
OGUIISO_01319	GEFL01000092	488	121.81	5	cd82 molecule
OGUIISO_01320	GEFL01000091	487	146.47	6	heme-binding protein 1
OGUIISO_01321	GEFL01000090	485	122.56	5	general transcription factor ii-i isoform 3
OGUIISO_01322	GEFL01000089	484	147.38	6	phosphoglycerate mutase 1
OGUIISO_01323	GEFL01000088	485	196.1	8	transitional endoplasmic reticulum atpase
OGUIISO_01324	GEFL01000087	481	197.73	8	dna-dependent protein kinase catalytic subunit
OGUIISO_01325	GEFL01000086	486	318	13	ribosomal protein l32
OGUIISO_01326	GEFL01000085	485	1078.53	44	60s ribosomal protein l28-like protein
OGUIISO_01327	GEFL01000084	487	43428	1779	---NA---
OGUIISO_01328	GEFL01000083	483	123.07	5	nadh dehydrogenase
OGUIISO_01329	GEFL01000082	482	147.99	6	a chain crystal structure of chk2 in complex with an inhibitor
OGUIISO_01330	GEFL01000081	482	172.65	7	rna-directed dna polymerase from mobile element jockey-like
OGUIISO_01331	GEFL01000080	481	148.3	6	poly -specific ribonuclease (deadenylation nuclease)
OGUIISO_01332	GEFL01000079	482	147.99	6	cytochrome c oxidase subunit viia polypeptide 2 like
OGUIISO_01333	GEFL01000078	481	617.9	25	40s ribosomal protein s23
OGUIISO_01334	GEFL01000077	481	197.73	8	60s ribosomal protein l23
OGUIISO_01335	GEFL01000076	480	123.84	5	---NA---
OGUIISO_01336	GEFL01000075	478	99.48	4	zinc finger protein 630
OGUIISO_01337	GEFL01000074	479	148.91	6	cysteine dioxygenase type 1
OGUIISO_01338	GEFL01000073	477	124.62	5	programmed cell death protein 4-like
OGUIISO_01339	GEFL01000072	476	249.76	10	---NA---
OGUIISO_01340	GEFL01000071	474	125.4	5	solute carrier family 35 member f5
OGUIISO_01341	GEFL01000070	473	804.29	32	ribosomal protein s12
OGUIISO_01342	GEFL01000069	475	150.17	6	aldehyde dehydrogenase
OGUIISO_01343	GEFL01000068	471	227.17	9	---NA---
OGUIISO_01344	GEFL01000067	473	251.34	10	---NA---
OGUIISO_01345	GEFL01000066	473	251.34	10	succinate dehydrogenase
OGUIISO_01346	GEFL01000065	473	100.54	4	---NA---
OGUIISO_01347	GEFL01000064	468	101.61	4	vomeronasal type-2 receptor 26-like
OGUIISO_01348	GEFL01000063	469	126.74	5	leucyl-cystinyl aminopeptidase
OGUIISO_01349	GEFL01000062	472	176.31	7	star-related lipid transfer protein mitochondrial
OGUIISO_01350	GEFL01000061	471	151.44	6	venom dipeptidylpeptidase iv
OGUIISO_01351	GEFL01000060	470	126.47	5	oxidoreductase glyr1 isoform 3
OGUIISO_01352	GEFL01000059	469	228.14	9	---NA---
OGUIISO_01353	GEFL01000058	471	151.44	6	e3 ubiquitin-protein ligase uhrf2-like
OGUIISO_01354	GEFL01000057	468	127.01	5	ubiquitin carboxyl-terminal hydrolase 1
OGUIISO_01355	GEFL01000056	468	152.42	6	---NA---
OGUIISO_01356	GEFL01000055	469	278.83	11	40s ribosomal protein s19-like
OGUIISO_01357	GEFL01000054	468	127.01	5	transposase
OGUIISO_01358	GEFL01000053	466	382.67	15	ribosomal protein l27
OGUIISO_01359	GEFL01000052	467	152.74	6	probable domain-containing histone demethylation protein 2c
OGUIISO_01360	GEFL01000051	466	153.07	6	zinc finger protein 706
OGUIISO_01361	GEFL01000050	467	127.28	5	60s ribosomal protein l22
OGUIISO_01362	GEFL01000049	462	205.86	8	---NA---
OGUIISO_01363	GEFL01000048	466	76.53	3	immunoglobulin lambda-like polypeptide 5-like
OGUIISO_01364	GEFL01000047	464	128.11	5	gamma-adducin isoform 2
OGUIISO_01365	GEFL01000046	462	154.39	6	---NA---
OGUIISO_01366	GEFL01000045	461	232.09	9	pol- partial
OGUIISO_01367	GEFL01000044	461	103.15	4	ras-related gtp-binding protein c
OGUIISO_01368	GEFL01000043	458	103.83	4	reverse transcriptase-like protein
OGUIISO_01369	GEFL01000042	455	130.64	5	sjoegren syndrome scleroderma autoantigen 1
OGUIISO_01370	GEFL01000041	456	260.71	10	40s ribosomal protein s17
OGUIISO_01371	GEFL01000040	451	158.16	6	slain motif-containing
OGUIISO_01372	GEFL01000039	450	264.19	10	c-4 methylsterol oxidase-like
OGUIISO_01373	GEFL01000038	449	132.39	5	sh3 domain binding glutamic acid-rich protein like 2
OGUIISO_01374	GEFL01000037	450	158.51	6	nicotinamide riboside kinase 2
OGUIISO_01375	GEFL01000036	448	557.27	21	60s ribosomal protein l30
OGUIISO_01376	GEFL01000035	440	162.11	6	182 kda tankyrase-1-binding protein
OGUIISO_01377	GEFL01000034	442	457.25	17	40s ribosomal protein s20
OGUIISO_01378	GEFL01000033	442	215.17	8	low quality protein: splicing factor 1-like
OGUIISO_01379	GEFL01000032	439	162.48	6	reverse transcriptase-like protein
OGUIISO_01380	GEFL01000031	435	327.96	12	40s ribosomal protein s15a
OGUIISO_01381	GEFL01000030	436	272.67	10	protein tyrosine receptor n
OGUIISO_01382	GEFL01000029	430	110.59	4	---NA---
OGUIISO_01383	GEFL01000028	431	137.92	5	---NA---
OGUIISO_01384	GEFL01000027	428	194.44	7	serine threonine-protein phosphatase pp1-gamma catalytic subunit-like
OGUIISO_01385	GEFL01000026	423	140.52	5	---NA---
OGUIISO_01386	GEFL01000025	422	169.03	6	---NA---
OGUIISO_01387	GEFL01000024	415	171.88	6	---NA---
OGUIISO_01388	GEFL01000023	414	172.3	6	---NA---
OGUIISO_01389	GEFL01000022	407	146.05	5	pol- partial
OGUIISO_01390	GEFL01000021	402	177.44	6	myosin light chain 5
OGUIISO_01391	GEFL01000020	388	153.2	5	40s ribosomal protein s29
OGUIISO_01392	GEFL01000019	383	217.28	7	ylp motif-containing protein 1
OGUIISO_01393	GEFL01000018	382	28631.7	920	---NA---
OGUIISO_01394	GEFL01000017	368	419.97	13	ribosomal protein s26
OGUIISO_01395	GEFL01000016	325	73.16	2	---NA---
OGUIISO_01396	GEFL01000015	323	184.03	5	---NA---
OGUIISO_01397	GEFL01000014	315	188.7	5	integrase core domain protein
OGUIISO_01398	GEFL01000013	308	38.6	1	---NA---
OGUIISO_01399	GEFL01000012	305	350.8	9	huntingtin-interacting protein 1-related protein
OGUIISO_01400	GEFL01000011	291	2001.82	49	---NA---
OGUIISO_01401	GEFL01000010	284	251.16	6	---NA---
OGUIISO_01402	GEFL01000009	281	211.54	5	probable atp-dependent rna helicase ddx41
OGUIISO_01403	GEFL01000008	273	6444.98	148	---NA---
OGUIISO_01404	GEFL01000007	264	585.41	13	---NA---
OGUIISO_01405	GEFL01000006	251	39975.2	844	---NA---
OGUIISO_01406	GEFL01000005	230	258.44	5	desmoplakin isoform 2
OGUIISO_01407	GEFL01000004	226	1052.07	20	---NA---
OGUIISO_01408	GEFL01000003	224	955.32	18	---NA---
OGUIISO_01409	GEFL01000002	226	368.22	7	---NA---
OGUIISO_01410	GEFL01000001	220	432.3	8	---NA---
OGUIREF_Lipo01	KX450875	697	297346	17433	Lipocalin

## Sheet: X merremi
Seq. Name	Accession	Length	Number of clones	Description
XMERCLU_00001C		444	2	---NA---
XMERCLU_00002C		572	3	RL7A_BOVIN 60S ribosomal protein L7a OS=Bos taurus GN=RPL7A PE=2 SV=3
XMERCLU_00003C		751	2	HMCN1_HUMAN Hemicentin-1 OS=Homo sapiens GN=HMCN1 PE=1 SV=2
XMERCLU_00004C		716	2	---NA---
XMERCLU_00005C		668	23	SLA_PHIOL Snaclec subunit A OS=Philodryas olfersii PE=2 SV=1
XMERCLU_00006C		843	4	NU1M_LYCSM NADH-ubiquinone oxidoreductase chain 1 OS=Lycodon semicarinatus GN=MT-ND1 PE=3 SV=1
XMERCLU_00007C		916	15	SLB_PHIOL Snaclec subunit B OS=Philodryas olfersii PE=2 SV=1
XMERCLU_00008C		612	2	VM31_BOTAT Zinc metalloproteinase-disintegrin-like batroxstatin-1 OS=Bothrops atrox PE=2 SV=1
XMERCLU_00009C		871	3	NU5M_LYCSM NADH-ubiquinone oxidoreductase chain 5 OS=Lycodon semicarinatus GN=MT-ND5 PE=3 SV=1
XMERCLU_00010C		535	4	DMBT1_RABIT Deleted in malignant brain tumors 1 protein OS=Oryctolagus cuniculus GN=Dmbt1 PE=1 SV=2
XMERCLU_00011C		799	2	---NA---
XMERCLU_00012C		485	2	RLA0_RAT 60S acidic ribosomal protein P0 OS=Rattus norvegicus GN=Rplp0 PE=1 SV=2
XMERCLU_00013C		1463	8	VM34_DRYCN Zinc metalloproteinase-disintegrin-like MTP4 OS=Drysdalia coronoides PE=1 SV=1
XMERCLU_00014C		1637	6	COX1_LYCSM Cytochrome c oxidase subunit 1 OS=Lycodon semicarinatus GN=MT-CO1 PE=3 SV=1
XMERCLU_00015C		636	2	---NA---
XMERCLU_00016C		768	2	VM31_BOTAT Zinc metalloproteinase-disintegrin-like batroxstatin-1 OS=Bothrops atrox PE=2 SV=1
XMERCLU_00017C		561	2	COPIA_DROME Copia protein OS=Drosophila melanogaster GN=GIP PE=1 SV=3
XMERCLU_00018C		840	16	SLB_PHIOL Snaclec subunit B OS=Philodryas olfersii PE=2 SV=1
XMERCLU_00019C		941	2	---NA---
XMERCLU_00020C		531	2	RL21_HUMAN 60S ribosomal protein L21 OS=Homo sapiens GN=RPL21 PE=1 SV=2
XMERCLU_00021C		509	2	PPIA_SYMSY Peptidyl-prolyl cis-trans isomerase A OS=Symphalangus syndactylus GN=PPIA PE=3 SV=3
XMERCLU_00022C		667	14	SLA_PHIOL Snaclec subunit A OS=Philodryas olfersii PE=2 SV=1
XMERCLU_00023C		810	3	RL7_CHICK 60S ribosomal protein L7 OS=Gallus gallus GN=RPL7 PE=2 SV=1
XMERCLU_00024C		645	10	VM39_DRYCN Zinc metalloproteinase-disintegrin-like MTP9 OS=Drysdalia coronoides PE=1 SV=1
XMERCLU_00025C		802	2	DMBT1_PIG Deleted in malignant brain tumors 1 protein OS=Sus scrofa GN=DMBT1 PE=2 SV=1
XMERCLU_00026C		1123	5	CYB_COLCO Cytochrome b OS=Coluber constrictor GN=MT-CYB PE=3 SV=1
XMERCLU_00027C		1623	28	VM3_CERRY Zinc metalloproteinase-disintegrin-like OS=Cerberus rynchops PE=1 SV=1
XMERCLU_00028C		685	24	SLB_PHIOL Snaclec subunit B OS=Philodryas olfersii PE=2 SV=1
XMERCLU_00029C		566	4	---NA---
XMERCLU_00030C		512	2	VM3_BUNMU Zinc metalloproteinase-disintegrin-like BmMP OS=Bungarus multicinctus PE=1 SV=1
XMERCLU_00031C		295	3	---NA---
XMERCLU_00032C		522	3	VM39_DRYCN Zinc metalloproteinase-disintegrin-like MTP9 OS=Drysdalia coronoides PE=1 SV=1
XMERCLU_00033C		486	2	---NA---
XMERCLU_00034C		566	2	ACTG_XENLA Actin, cytoplasmic 2 OS=Xenopus laevis GN=actg1 PE=2 SV=1
XMERCLU_00035C		751	2	CRVP_ERYPO Cysteine-rich venom protein LIO1 (Fragment) OS=Erythrolamprus poecilogyrus PE=2 SV=1
XMERCLU_00036C		623	2	RS3_RAT 40S ribosomal protein S3 OS=Rattus norvegicus GN=Rps3 PE=1 SV=1
XMERCLU_00037C		888	3	NU4M_LYCSM NADH-ubiquinone oxidoreductase chain 4 OS=Lycodon semicarinatus GN=MT-ND4 PE=3 SV=1
XMERCLU_00038C		481	4	---NA---
XMERCLU_00039C		466	3	3SX4_DISTY Toxin 3FTx-Dis4 OS=Dispholidus typus PE=3 SV=1
XMERCLU_00040C		1160	9	---NA---
XMERCLU_00041C		308	5	NU2M_LYCSM NADH-ubiquinone oxidoreductase chain 2 OS=Lycodon semicarinatus GN=MT-ND2 PE=3 SV=1
XMERCLU_00042C		874	3	RCAS1_CANLF Receptor-binding cancer antigen expressed on SiSo cells OS=Canis lupus familiaris GN=EBAG9 PE=2 SV=1
XMERCLU_00043C		520	3	RS24_PONAB 40S ribosomal protein S24 OS=Pongo abelii GN=RPS24 PE=2 SV=1
XMERCLU_00044C		1123	34	ZP3R_MOUSE Zona pellucida sperm-binding protein 3 receptor OS=Mus musculus GN=Zp3r PE=1 SV=1
XMERCLU_00045C		546	2	AGR2_MOUSE Anterior gradient protein 2 homolog OS=Mus musculus GN=Agr2 PE=1 SV=1
XMERCLU_00046C		464	3	---NA---
XMERCLU_00047C		474	3	---NA---
XMERCLU_00048C		604	2	RL10_CHICK 60S ribosomal protein L10 (Fragment) OS=Gallus gallus GN=RPL10 PE=2 SV=1
XMERCLU_00049C		381	3	RS29_RAT 40S ribosomal protein S29 OS=Rattus norvegicus GN=Rps29 PE=1 SV=2
XMERCLU_00050C		337	4	NU3M_LYCSM NADH-ubiquinone oxidoreductase chain 3 OS=Lycodon semicarinatus GN=MT-ND3 PE=3 SV=1
XMERCLU_00051C		311	2	---NA---
XMERCLU_00052C		423	2	---NA---
XMERCLU_00053C		385	6	SLA_PHIOL Snaclec subunit A OS=Philodryas olfersii PE=2 SV=1
XMERCLU_00054C		543	2	RS10_HUMAN 40S ribosomal protein S10 OS=Homo sapiens GN=RPS10 PE=1 SV=1
XMERCLU_00055C		587	2	RS13_RAT 40S ribosomal protein S13 OS=Rattus norvegicus GN=Rps13 PE=1 SV=2
XMERCLU_00056C		647	6	---NA---
XMERCLU_00057C		496	3	RL23_RAT 60S ribosomal protein L23 OS=Rattus norvegicus GN=Rpl23 PE=2 SV=1
XMERCLU_00058C		453	3	RLA2_BOVIN 60S acidic ribosomal protein P2 OS=Bos taurus GN=RPLP2 PE=3 SV=1
XMERCLU_00059C		811	4	ATP6_LYCSM ATP synthase subunit a OS=Lycodon semicarinatus GN=MT-ATP6 PE=3 SV=1
XMERCLU_00060C		242	4	NU4M_OVOOK NADH-ubiquinone oxidoreductase chain 4 (Fragment) OS=Ovophis okinavensis GN=MT-ND4 PE=3 SV=1
XMERCLU_00061C		546	3	---NA---
XMERCLU_00062C		570	7	---NA---
XMERCLU_00063C		593	2	VM31_LACMR Zinc metalloproteinase-disintegrin-like lachestatin-1 OS=Lachesis muta rhombeata PE=2 SV=1
XMERCLU_00064C		516	5	---NA---
XMERCLU_00066C		548	4	---NA---
XMERCLU_00067C		560	2	---NA---
XMERCLU_00068C		492	2	---NA---
XMERCLU_00069C		465	3	RS15A_RAT 40S ribosomal protein S15a OS=Rattus norvegicus GN=Rps15a PE=1 SV=2
XMERCLU_00070C		505	2	RS15_BOVIN 40S ribosomal protein S15 OS=Bos taurus GN=RPS15 PE=2 SV=3
XMERCLU_00071C		498	6	NEUM_BUFJA Mesotocin-neurophysin MT OS=Bufo japonicus PE=2 SV=1
XMERCLU_00072C		381	2	---NA---
XMERCLU_00073C		250	2	---NA---
XMERCLU_00074C		966	11	---NA---
XMERCLU_00075C		533	2	LDHA_SCEUN L-lactate dehydrogenase A chain OS=Sceloporus undulatus GN=LDHA PE=2 SV=3
XMERCLU_00076S		521	1	E2AK4_MOUSE eIF-2-alpha kinase GCN2 OS=Mus musculus GN=Eif2ak4 PE=1 SV=2
XMERCLU_00077S		426	1	RT09_BOVIN 28S ribosomal protein S9, mitochondrial OS=Bos taurus GN=MRPS9 PE=1 SV=3
XMERCLU_00078S		464	1	---NA---
XMERCLU_00079S		512	1	TECTA_MOUSE Alpha-tectorin OS=Mus musculus GN=Tecta PE=1 SV=2
XMERCLU_00080S		380	1	---NA---
XMERCLU_00081S		296	1	QCR2_BOVIN Cytochrome b-c1 complex subunit 2, mitochondrial OS=Bos taurus GN=UQCRC2 PE=1 SV=2
XMERCLU_00082S		391	1	---NA---
XMERCLU_00083S		439	1	---NA---
XMERCLU_00084S		474	1	GLRX3_RAT Glutaredoxin-3 OS=Rattus norvegicus GN=Glrx3 PE=1 SV=2
XMERCLU_00085S		410	1	RL8_PONAB 60S ribosomal protein L8 OS=Pongo abelii GN=RPL8 PE=2 SV=3
XMERCLU_00086S		453	1	---NA---
XMERCLU_00087S		434	1	COPIA_DROME Copia protein OS=Drosophila melanogaster GN=GIP PE=1 SV=3
XMERCLU_00088S		443	1	C1QBP_RAT Complement component 1 Q subcomponent-binding protein, mitochondrial OS=Rattus norvegicus GN=C1qbp PE=1 SV=2
XMERCLU_00089S		464	1	SSRB_CANLF Translocon-associated protein subunit beta OS=Canis lupus familiaris GN=SSR2 PE=1 SV=1
XMERCLU_00090S		473	1	---NA---
XMERCLU_00091S		430	1	---NA---
XMERCLU_00092S		489	1	EF1G_RABIT Elongation factor 1-gamma OS=Oryctolagus cuniculus GN=EEF1G PE=2 SV=3
XMERCLU_00093S		354	1	---NA---
XMERCLU_00094S		418	1	SDA1_HUMAN Protein SDA1 homolog OS=Homo sapiens GN=SDAD1 PE=1 SV=3
XMERCLU_00095S		220	1	---NA---
XMERCLU_00096S		480	1	---NA---
XMERCLU_00097S		489	1	---NA---
XMERCLU_00098S		482	1	SIM22_HUMAN Small integral membrane protein 22 OS=Homo sapiens GN=SMIM22 PE=2 SV=1
XMERCLU_00099S		498	1	---NA---
XMERCLU_00100S		472	1	RL4_CANLF 60S ribosomal protein L4 OS=Canis lupus familiaris GN=RPL4 PE=1 SV=2
XMERCLU_00101S		294	1	LV107_HUMAN Ig lambda chain V-I region BL2 OS=Homo sapiens PE=2 SV=1
XMERCLU_00102S		205	1	ACTM_LYTPI Actin, muscle (Fragment) OS=Lytechinus pictus PE=3 SV=1
XMERCLU_00103S		236	1	TCTP_CROHD Translationally-controlled tumor protein homolog OS=Crotalus horridus PE=2 SV=1
XMERCLU_00104S		571	1	RT05_BOVIN 28S ribosomal protein S5, mitochondrial OS=Bos taurus GN=MRPS5 PE=1 SV=1
XMERCLU_00105S		533	1	SPB5_MOUSE Serpin B5 OS=Mus musculus GN=Serpinb5 PE=1 SV=1
XMERCLU_00106S		580	1	---NA---
XMERCLU_00107S		459	1	SPCS3_CHICK Signal peptidase complex subunit 3 OS=Gallus gallus GN=SPC22 PE=1 SV=1
XMERCLU_00108S		514	1	ACT5_XENLA Actin, cytoplasmic type 5 OS=Xenopus laevis PE=3 SV=1
XMERCLU_00109S		490	1	CS043_HUMAN Uncharacterized protein C19orf43 OS=Homo sapiens GN=C19orf43 PE=1 SV=1
XMERCLU_00111S		339	1	CR1L_RAT Complement component receptor 1-like protein OS=Rattus norvegicus GN=Cr1l PE=1 SV=1
XMERCLU_00112S		486	1	COX1_LYCSM Cytochrome c oxidase subunit 1 OS=Lycodon semicarinatus GN=MT-CO1 PE=3 SV=1
XMERCLU_00113S		331	1	---NA---
XMERCLU_00114S		464	1	---NA---
XMERCLU_00115S		531	1	---NA---
XMERCLU_00116S		463	1	---NA---
XMERCLU_00117S		508	1	ENTP8_CHICK Ectonucleoside triphosphate diphosphohydrolase 8 OS=Gallus gallus GN=ENTPD8 PE=1 SV=1
XMERCLU_00118S		200	1	---NA---
XMERCLU_00119S		204	1	KPYM_FELCA Pyruvate kinase PKM OS=Felis catus GN=PKM PE=1 SV=2
XMERCLU_00120S		438	1	---NA---
XMERCLU_00121S		521	1	IP6K2_RABIT Inositol hexakisphosphate kinase 2 OS=Oryctolagus cuniculus GN=IP6K2 PE=2 SV=1
XMERCLU_00122S		436	1	NUDC_CHICK Nuclear migration protein nudC OS=Gallus gallus GN=NUDC PE=2 SV=1
XMERCLU_00123S		528	1	ADT3_HUMAN ADP/ATP translocase 3 OS=Homo sapiens GN=SLC25A6 PE=1 SV=4
XMERCLU_00124S		492	1	ODO2_RAT Dihydrolipoyllysine-residue succinyltransferase component of 2-oxoglutarate dehydrogenase complex, mitochondrial OS=Rattus norvegicus GN=Dlst PE=1 SV=2
XMERCLU_00127S		474	1	---NA---
XMERCLU_00128S		521	1	SNX9_MOUSE Sorting nexin-9 OS=Mus musculus GN=Snx9 PE=1 SV=1
XMERCLU_00129S		428	1	---NA---
XMERCLU_00130S		540	1	---NA---
XMERCLU_00131S		464	1	MUC5A_HUMAN Mucin-5AC OS=Homo sapiens GN=MUC5AC PE=1 SV=4
XMERCLU_00132S		557	1	---NA---
XMERCLU_00133S		559	1	---NA---
XMERCLU_00134S		311	1	---NA---
XMERCLU_00135S		431	1	---NA---
XMERCLU_00136S		469	1	CN166_MOUSE UPF0568 protein C14orf166 homolog OS=Mus musculus PE=1 SV=1
XMERCLU_00137S		484	1	COPIA_DROME Copia protein OS=Drosophila melanogaster GN=GIP PE=1 SV=3
XMERCLU_00138S		472	1	Inhibitor of carbonic anhydrase; Flags: Precursor
XMERCLU_00139S		526	1	Receptor of activated protein C kinase 1; AltName: Full=Guanine nucleotide-binding protein subunit beta-2-like
XMERCLU_00140S		533	1	Proteasome subunit beta type-3; AltName: Full=Proteasome chain 13
XMERCLU_00141S		462	1	Serine--tRNA ligase, cytoplasmic; AltName: Full=Seryl-tRNA synthetase
XMERCLU_00142S		415	1	---NA---
XMERCLU_00143S		535	1	---NA---
XMERCLU_00144S		423	1	---NA---
XMERCLU_00145S		439	1	Serine--tRNA ligase, cytoplasmic; AltName: Full=Seryl-tRNA synthetase; Short=SerRS; AltName: Full=Seryl-tRNA(Ser/Sec) synthetase
XMERCLU_00146S		258	1	Splicing factor 3B subunit 1; AltName: Full=146 kDa nuclear protein
XMERCLU_00147S		398	1	Pre-rRNA-processing protein TSR1 homolog
XMERCLU_00148S		515	1	Proteasome subunit alpha type-4; AltName: Full=Macropain subunit C9; AltName: Full=Multicatalytic endopeptidase complex subunit C9
XMERCLU_00150S		207	1	---NA---
XMERCLU_00151S		479	1	---NA---
XMERCLU_00152S		544	1	Elongation factor 1-alpha 1; Short=EF-1-alpha-1; AltName: Full=Elongation factor Tu; Short=EF-Tu
XMERCLU_00153S		396	1	---NA---
XMERCLU_00154S		289	1	Protein FAM32A; AltName: Full=Ovarian tumor-associated gene 12; Short=OTAG-12
XMERCLU_00155S		523	1	---NA---
XMERCLU_00156S		561	1	Gamma-aminobutyric acid receptor-associated protein; AltName: Full=GABA(A) receptor-associated protein; Flags: Precursor
XMERCLU_00157S		494	1	---NA---
XMERCLU_00158S		530	1	Serine/threonine-protein kinase ULK1; AltName: Full=Autophagy-related protein 1 homolog; Short=ATG1
XMERCLU_00159S		525	1	Protein disulfide-isomerase; Short=PDI; AltName: Full=Cellular thyroid hormone-binding protein
XMERCLU_00160S		527	1	Pantothenate kinase 4; Short=hPanK4; AltName: Full=Pantothenic acid kinase 4
XMERCLU_00161S		524	1	40S ribosomal protein S3a
XMERCLU_00162S		523	1	---NA---
XMERCLU_00163S		504	1	---NA---
XMERCLU_00164S		450	1	Transcription initiation factor TFIID subunit 7
XMERCLU_00165S		437	1	Translationally-controlled tumor protein homolog; Short=TCTP [Crotalus adamanteus]
XMERCLU_00166S		482	1	---NA---
XMERCLU_00167S		579	1	---NA---
XMERCLU_00168S		551	1	---NA---
XMERCLU_00169S		528	1	Brain-specific angiogenesis inhibitor 1-associated protein 2-like protein 1; Short=BAI1-associated protein 2-like protein 1
XMERCLU_00170S		540	1	Ferritin heavy chain; Short=Ferritin H subunit
XMERCLU_00171S		498	1	Cartilage oligomeric matrix protein; Short=COMP; Flags: Precursor
XMERCLU_00172S		540	1	5'(3')-deoxyribonucleotidase, cytosolic type; AltName: Full=Cytosolic 5',3'-pyrimidine nucleotidase
XMERCLU_00173S		490	1	Dual specificity tyrosine-phosphorylation-regulated kinase 2
XMERCLU_00174S		509	1	---NA---
XMERCLU_00175S		405	1	60S ribosomal protein L14
XMERCLU_00176S		550	1	Glyceraldehyde-3-phosphate dehydrogenase; Short=GAPDH; AltName: Full=Peptidyl-cysteine S-nitrosylase GAPDH
XMERCLU_00177S		557	1	---NA---
XMERCLU_00178S		528	1	Spliceosome-associated protein CWC15 homolog
XMERCLU_00179S		407	1	---NA---
XMERCLU_00180S		278	1	---NA---
XMERCLU_00181S		433	1	Ankyrin repeat and KH domain-containing protein 1; AltName: Full=HIV-1 Vpr-binding ankyrin repeat protein
XMERCLU_00182S		518	1	Vacuolar protein sorting-associated protein 4B
XMERCLU_00183S		499	1	Programmed cell death protein 2; AltName: Full=Zinc finger protein Rp-8
XMERCLU_00184S		477	1	---NA---
XMERCLU_00185S		490	1	---NA---
XMERCLU_00186S		481	1	Nucleoside diphosphate kinase; Short=NDK; Short=NDP kinase
XMERCLU_00187S		491	1	---NA---
XMERCLU_00188S		406	1	Transcription elongation factor B polypeptide 2; AltName: Full=Elongin 18 kDa subunit
XMERCLU_00189S		503	1	Oligoribonuclease, mitochondrial; AltName: Full=RNA exonuclease 2 homolog; AltName: Full=Small fragment nuclease; Flags: Precursor
XMERCLU_00190S		562	1	---NA---
XMERCLU_00191S		472	1	Thiosulfate sulfurtransferase; AltName: Full=Rhodanese
XMERCLU_00191S		545	1	von Willebrand factor A domain-containing protein 7; AltName: Full=Protein G7c; Flags: Precursor
XMERCLU_00192S		509	1	---NA---
XMERCLU_00193S		424	1	---NA---
XMERCLU_00194S		525	1	---NA---
XMERCLU_00195S		511	1	Vesicle transport protein SEC20
XMERCLU_00196S		549	1	U4/U6 small nuclear ribonucleoprotein Prp31; AltName: Full=Pre-mRNA-processing factor 31
XMERCLU_00197S		404	1	---NA---
XMERCLU_00198S		445	1	---NA---
XMERCLU_00199S		529	1	---NA---
XMERCLU_00200S		431	1	---NA---
XMERCLU_00201S		526	1	---NA---
XMERCLU_00202S		543	1	---NA---
XMERCLU_00203S		535	1	---NA---
XMERCLU_00204S		561	1	60S ribosomal protein L5
XMERCLU_00205S		516	1	---NA---
XMERCLU_00206S		412	1	MORC family CW-type zinc finger protein 2; AltName: Full=Zinc finger CW-type coiled-coil domain protein 1
XMERCLU_00207S		255	1	---NA---
XMERCLU_00208S		541	1	---NA---
XMERCLU_00209S		310	1	---NA---
XMERCLU_00210S		366	1	---NA---
XMERCLU_00211S		325	1	---NA---
XMERCLU_00212S		380	1	Snaclec subunit B; AltName: Full=C-type lectin subunit B; Flags: Precursor
XMERCLU_00213S		364	1	---NA---
XMERCLU_00214S		266	1	---NA---
XMERCLU_00215S		363	1	---NA---
XMERCLU_00216S		253	1	---NA---
XMERCLU_00221S		270	1	---NA---
XMERCLU_00222S		467	1	Basic leucine zipper and W2 domain-containing protein 1; AltName: Full=Protein Orf
XMERCLU_00223S		250	1	---NA---
XMERCLU_00225S		232	1	---NA---
XMERCLU_00226S		509	1	---NA---
XMERCLU_00229S		400	1	60S ribosomal protein L34
XMERCLU_00230S		378	1	---NA---
XMERCLU_00231S		417	1	---NA---
XMERCLU_00232S		381	1	---NA---
XMERCLU_00233S		307	1	---NA---
XMERCLU_00236S		379	1	---NA---
XMERCLU_00237S		360	1	---NA---
XMERCLU_00238S		334	1	---NA---
XMERCLU_00239S		341	1	NADH dehydrogenase [ubiquinone] 1 beta subcomplex subunit 3; AltName: Full=Complex I-B12
XMERCLU_00240S		474	1	Toxin 3FTx-Thr5; Flags: Precursor
XMERCLU_00241S		555	1	Keratin, type I cytoskeletal 18; AltName: Full=Cell proliferation-inducing gene 46 protein; AltName: Full=Cytokeratin-18
XMERCLU_00243S		389	1	Cytochrome c oxidase subunit 2; AltName: Full=Cytochrome c oxidase polypeptide II
XMERCLU_00245S		370	1	---NA---
XMERCLU_00246S		273	1	---NA---
XMERCLU_00247S		205	1	---NA---
XMERCLU_00248S		220	1	---NA---
XMERCLU_00250S		487	1	Thioredoxin domain-containing protein 17; AltName: Full=Thioredoxin-like protein 5
XMERCLU_00251S		273	1	Cytochrome c oxidase subunit 7C, mitochondrial; AltName: Full=Cytochrome c oxidase polypeptide VIIc; Flags: Precursor
XMERCLU_00252S		385	1	---NA---
XMERCLU_00253S		425	1	---NA---
XMERCLU_00254S		384	1	---NA---
XMERCLU_00255S		315	1	40S ribosomal protein S19
XMERCLU_00256S		283	1	---NA---
XMERCLU_00259S		450	1	---NA---
XMERCLU_00260S		538	1	---NA---
XMERCLU_00261S		579	1	Prefoldin subunit 6; AltName: Full=Protein Ke2
XMERCLU_00262S		385	1	Zinc metalloproteinase-disintegrin-like lachestatin-1; AltName: Full=Snake venom metalloprotease; Short=SVMP
XMERCLU_00263S		436	1	Citrate synthase, mitochondrial; AltName: Full=Citrate (Si)-synthase; Flags: Precursor
XMERCLU_00264S		487	1	---NA---
XMERCLU_00265S		582	1	60S ribosomal protein L18
XMERCLU_00266S		304	1	Zinc metalloproteinase-disintegrin-like ACLD; AltName: Full=Snake venom metalloproteinase; Short=SVMP; AltName: Full=VMP-III
XMERCLU_00267S		269	1	---NA---
XMERCLU_00268S		464	1	---NA---
XMERCLU_00269S		443	1	40S ribosomal protein S12
XMERCLU_00270S		554	1	---NA---
XMERCLU_00271S		565	1	Zinc finger CCCH domain-containing protein 14
XMERCLU_00272S		530	1	---NA---
XMERCLU_00273S		206	1	---NA---
XMERCLU_00274S		513	1	---NA---
XMERCLU_00275S		572	1	---NA---
XMERCLU_00276S		438	1	---NA---
XMERCLU_00277S		282	1	---NA---
XMERCLU_00278S		400	1	---NA---
XMERCLU_00279S		555	1	---NA---
XMERCLU_00280S		341	1	---NA---
XMERCLU_00281S		507	1	---NA---
XMERCLU_00282S		331	1	Peptidyl-prolyl cis-trans isomerase FKBP2; Short=PPIase FKBP2; AltName: Full=FK506-binding protein 2; Short=FKBP-2
XMERCLU_00283S		549	1	60S ribosomal protein L38
XMERCLU_00284S		327	1	Cytochrome c oxidase subunit 3; AltName: Full=Cytochrome c oxidase polypeptide III
XMERCLU_00285S		204	1	Myosin-10; AltName: Full=Cellular myosin heavy chain, type B; AltName: Full=Myosin heavy chain 10
XMERCLU_00286S		232	1	---NA---
XMERCLU_00287S		370	1	---NA---
XMERCLU_00288S		506	1	60S ribosomal protein L39
XMERCLU_00289S		471	1	---NA---
XMERCLU_00290S		560	1	Probable weak neurotoxin 3FTx-Lio1; Flags: Precursor
XMERCLU_00291S		562	1	---NA---
XMERCLU_00292S		528	1	---NA---
XMERCLU_00293S		358	1	60S acidic ribosomal protein P0; AltName: Full=60S ribosomal protein L10E
XMERCLU_00294S		295	1	---NA---
XMERCLU_00295S		283	1	NADH dehydrogenase [ubiquinone] 1 alpha subcomplex subunit 2; AltName: Full=Complex I-B8; Short=CI-B8;
XMERCLU_00296S		348	1	---NA---
XMERCLU_00297S		251	1	40S ribosomal protein S28
XMERCLU_00298S		417	1	---NA---
XMERCLU_00301S		305	1	---NA---
XMERCLU_00303S		216	1	---NA---
XMERCLU_00304S		453	1	NADH dehydrogenase [ubiquinone] iron-sulfur protein 5; AltName: Full=Complex I-15 kDa
XMERCLU_00306S		218	1	---NA---
XMERCLU_00307S		221	1	---NA---
XMERCLU_00308S		509	1	---NA---
XMERCLU_00309S		265	1	---NA---
XMERCLU_00311S		329	1	Ferritin light chain; Short=Ferritin L subunit
XMERCLU_00312S		486	1	THO complex subunit 5 homolog; AltName: Full=Functional spliceosome-associated protein 79; Short=fSAP79
XMERCLU_00313S		364	1	Protein transport protein Sec61 subunit gamma
XMERCLU_00314S		364	1	---NA---
XMERCLU_00315S		347	1	---NA---
XMERCLU_00316S		258	1	---NA---
XMERCLU_00317S		249	1	---NA---
XMERCLU_00318S		420	1	Dimethyladenosine transferase 1, mitochondrial; AltName: Full=Mitochondrial 12S rRNA dimethylase 1; AltName: Full=Mitochondrial transcription factor B1
XMERCLU_00319S		255	1	---NA---
XMERCLU_00320S		234	1	---NA---
XMERCLU_00321S		233	1	---NA---
XMERCLU_00322S		468	1	Putative oxidoreductase YtkK
XMERCLU_00323S		257	1	Coatomer subunit zeta-1; AltName: Full=Zeta-1-coat protein; Short=Zeta-1 COP
XMERCLU_00324S		474	1	---NA---
XMERCLU_00325S		307	1	---NA---
XMERCLU_00329S		471	1	Mannose-binding protein C; Short=MBP-C; AltName: Full=27 kDa mannan-binding protein monomeric subunit; Short=pMBP-27
XMERCLU_00330S		309	1	---NA---
XMERCLU_00331S		499	1	C-type lectin lectoxin-Lio1; Short=CTL; Flags: Precursor [Erythrolamprus poecilogyrus]
XMERCLU_00332S		352	1	---NA---
XMERCLU_00333S		339	1	Snaclec subunit A; AltName: Full=C-type lectin subunit A; Flags: Precursor [Philodryas olfersii]
XMERCLU_00334S		511	1	Ubiquitin-like protein FUBI
XMERCLU_00335S		256	1	Protein transport protein Sec61 subunit alpha isoform 1; Short=Sec61 alpha-1
XMERCLU_00336S		452	1	---NA---
XMERCLU_00337S		374	1	---NA---
XMERCLU_00338S		330	1	Ubiquitin-40S ribosomal protein S27a; AltName: Full=Ubiquitin carboxyl extension protein 80
XMERCLU_00339S		266	1	---NA---
XMERCLU_00340S		452	1	---NA---
XMERCLU_00341S		339	1	---NA---
XMERCLU_00342S		320	1	---NA---
XMERCLU_00343S		184	1	---NA---
